# Supplementary material for: DABCO-catalyzed mono- and bisallylation of β,γ-unsaturated ketones with Morita–Baylis–Hillman carbonates
Source: Royal Society of Chemistry journal article supplement (doi:10.1039/d4nj02086c), 2024-01-01
Supplement: d4nj02086c1.pdf [file d4nj02086c1.pdf]

*New Journal of Chemistry*

*Supporting Information*

**DABCO-catalyzed mono- and bisallylation of  $\beta,\gamma$ -unsaturated ketones with  
Morita-Baylis-Hillman carbonates**

Guizhou Yue,<sup>\*a,b</sup> Biao Du,<sup>c</sup> Qiumi Wang,<sup>a</sup> Silu Cheng,<sup>a</sup> Lan Ma,<sup>a</sup> Cuifen Lu,<sup>b</sup> Juhua Feng,<sup>a</sup> Haipeng Hu,<sup>a</sup>  
Sicheng Li,<sup>a,d</sup> and Qiao He<sup>a,e</sup>

<sup>a</sup>College of Science, Sichuan Agricultural University, Ya'an, Sichuan, 625014, China.

<sup>b</sup>Collaborative Innovation Center for Advanced Organochemical Materials & Ministry-of-Education Key Laboratory for the Synthesis and Application of Organic Functional Molecules, Hubei University, Wuhan 430062, China.

<sup>c</sup>Chengdu EASTON Biopharmaceuticals Co. Ltd., Chengdu, Sichuan, 611731, China.

<sup>d</sup>The Yingjing County Emergency Management Agency, Ya'an, Sichuan, 625200, China.

<sup>e</sup>Agriculture and Rural Bureau of Daying Country, Suining, Sichuan, 629300, China.

## I. General Methods

All reactions were carried out without strict water-free and oxygen-free conditions. All reagents were obtained from commercial suppliers unless otherwise stated. All solvents and reagents were directly used for reactions without further purification unless otherwise stated. When the reactions preformed at the condition of DABCO, 1,4-Dioxane and DCM was pre-dried with CaH<sub>2</sub>. Flash chromatography was performed using silica gel (200-300 mesh). Reactions were monitored by TLC or/and colour changes of reaction solution. Visualization was achieved under a UV lamp (254 nm and 365 nm), I<sub>2</sub> and by developing the plates with anisaldehyde. <sup>1</sup>H and <sup>13</sup>C NMR were recorded on 400 and 600 MHz NMR spectrometers with tetramethylsilane (TMS) as the internal standard and were calibrated using residual undeuterated solvent as an internal reference (CHCl<sub>3</sub>: <sup>1</sup>H NMR= 7.26, <sup>13</sup>C NMR= 77.16; DMSO-*d*<sub>6</sub>: <sup>1</sup>H NMR= 2.50, <sup>13</sup>C NMR= 39.52). IR spectra were acquired on an FT-IR spectrometer and are reported in wavenumbers (cm<sup>-1</sup>). High-resolution mass spectra were obtained using electrospray ionization (ESI). The following abbreviations are used for the multiplicities: *s*: singlet, *d*: doublet, *t*: triplet, *m*: multiplet, *br s*: broad singlet for proton spectra. Coupling constants (*J*) are reported in Hertz (Hz).

## II. Preparation of intermediates

A mixture of ketone (4.0 mmol, 1.0 equiv.), alkyne (4.0 mmol, 1.0 equiv.) and *t*BuOK (4.0 mmol, 1.0 equiv.) in DMSO (10 mL) was heated and stirred at 100 °C for 0.5-1 h. After cooling to room temperature, the reaction mixture was diluted with H<sub>2</sub>O (10 mL), neutralized with saturated aqueous NH<sub>4</sub>Cl and extracted with ethyl acetate (3×10 mL). The organic layer was washed with H<sub>2</sub>O and dried with anhydrous MgSO<sub>4</sub>. After removal of ethyl acetate, the product was purified by flash chromatography (hexane/ethyl acetate = 27/1-20/1) to afford **1** as a white or yellow solid (33-72% yield).<sup>1</sup> All MBH carbonates **2** were prepared by two-step reactions, including the Morta-Maylis-Hillman reaction (1 equiv. DABCO/1 equiv. aldehyde/1.5 equiv. acrylate/1:1 dioxane:H<sub>2</sub>O or THF/2-3 days)<sup>2</sup> and the formation of *O*-Boc derivative (0.1 equiv. DMAP/1 equiv. MBH-alcohol/1.5 equiv. Boc<sub>2</sub>O/DCM/rt/overnight), with 22-64% total yields.<sup>3</sup>

## III. General procedure for condition optimization

A 10 mL tube was charged with  $\beta,\gamma$ -unsaturated ketones **1a** (0.2 mmol, 1.0 equiv.), MBH carbonate **2a** (0.3-0.6 mmol, 1.5-3.0 equiv.), base (0.01-0.04 mmol, 5-20 mol%) and solvent (0.5-2 mL). The suspended solution was vigorously stirred at rt-reflux, and then base was added. The reaction mixture was stirred at room temperature and monitor by TLC plate. The solution was added by 5 mL H<sub>2</sub>O and 10 mL brine, before the resulting mixture was extracted with EtOAc (3 x 10 mL). The combined organic layers were dry with Na<sub>2</sub>SO<sub>4</sub>, filtered, and concentrated. The residue was purified by flash silica gel chromatography eluted with EtOAc:PE (1:25) to afford the corresponding products **3a**.

## IV. General procedure for typical procedure for monoallylation

A tube (25 mL) was charged with  $\beta,\gamma$ -unsaturated ketones **1a** (0.5 mmol, 1.0 equiv.), MBH carbonate **2a** (0.75 mmol, 1.5 equiv.) and dioxane (1.25 mL). The suspended solution was vigorously stirred at rt, and then DABCO (0.025 mmol, 0.05 equiv., 5 mol%) was added. When the reaction mixture became clear the reaction finished (5 min-24 h). The solution was added by 10 mL H<sub>2</sub>O and 10 mL brine, before the resulting mixture was extracted with DCM (3 x 10 mL). The combined organic layers were dry with Na<sub>2</sub>SO<sub>4</sub>, filtered, and concentrated. The residue was purified by flash silica gel chromatography eluted with EtOAc:PE (1:27 to 1:20) to afford the corresponding monoallylated products **3**.

## V. General procedure for typical procedure for dialkylation

A tube (25mL) was charged with  $\beta,\gamma$ -unsaturated ketones **1a** (0.5 mmol, 1.0 equiv.), MBH carbonate **2a** (2.25 mmol, 4.5 equiv.) and DCM (1.25 mL). The suspended solution was vigorously stirred at rt, and then DABCO (0.1 mmol, 0.2 equiv., 20 mol%) was added. When the reaction mixture became clear the reaction finished (2-24 h). The solution was added by 10 mL H<sub>2</sub>O and 10 mL brine, before the resulting mixture was extracted with DCM (3 x 10 mL). The combined organic layers were dry with Na<sub>2</sub>SO<sub>4</sub>, filtered, and concentrated. The residue was purified by flash column chromatography eluted with EtOAc:PE (1:23 to 1:19) to afford the corresponding diallylated products **4** and **6**.

## VI. The phenomenon of the reaction and TLC.

TLC of starting materials (**1a** and **2a**) and products (**3a**, **4a** and **6a**) showed the result (Fig. 1).

EtOAc:Petroleum ether = 1:8 (v/v)

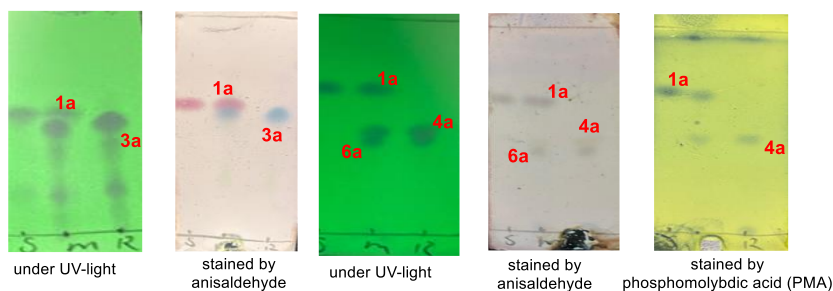

Fig. 1

## VII. Data for all new compounds

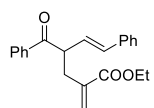

[Reaction time: 5 min]; **3a**: 158 mg, 95%, a yellow oil; IR (thin film):  $\nu_{\max}$  2982, 1712, 1631, 1447, 1192, 1027, 967, 747, 692  $\text{cm}^{-1}$ ;  $^1\text{H}$  NMR (400 MHz,  $\text{CDCl}_3$ ):  $\delta$  8.04 (m, 2H), 7.58-7.53 (m, 1H), 7.46 ( $\psi\text{t}$ ,  $J = 7.4$  Hz, 2H), 7.33-7.25 (m, 4H), 7.30-7.26 (m, 2H), 7.22-7.18 (m, 1H), 6.46 (d,  $J = 16.0$  Hz, 1H), 6.24 (dd,  $J = 16.0, 9.2$  Hz, 1H), 6.18 (d,  $J = 1.2$  Hz, 1H), 5.59 (d,  $J = 0.8$  Hz, 1H), 4.57 (td,  $J = 8.4, 6.8$  Hz, 1H), 4.21 (q,  $J = 7.2$  Hz, 2H), 3.02 (dd,  $J = 14.0, 6.4$  Hz, 1H), 2.67 (dd,  $J = 14.0, 8.0$  Hz, 1H), 1.29 (t,  $J = 7.2$  Hz, 3H);  $^{13}\text{C}$  NMR (100 MHz,  $\text{CDCl}_3$ ):  $\delta$  200.2, 167.0, 137.4, 136.7, 133.4, 133.2, 128.7, 128.6, 128.5, 128.0, 127.7, 126.3, 60.8, 49.6, 35.5, 14.2; HRMS (ESI):  $m/z$  calcd for  $\text{C}_{22}\text{H}_{22}\text{O}_3\text{Na}$   $[\text{M}+\text{Na}]^+$  357.1467, found 357.1416.

[Reaction time: 5 min]; **3b**: 139 mg, 80%, a yellow oil; IR (thin film):  $\nu_{\max}$  2982, 1712, 1447, 1264, 1193, 1142, 969, 819, 709  $\text{cm}^{-1}$ ;  $^1\text{H}$  NMR (400 MHz,  $\text{CDCl}_3$ ):  $\delta$  8.04 (dt,  $J = 7.2, 1.4$  Hz, 2H), 7.58-7.52 (m, 1H), 7.49-7.43 (m, 2H), 7.21 (dt,  $J = 8.4, 2.4$  Hz, 2H), 7.08 (d,  $J = 8.0$  Hz, 2H), 6.42 (d,  $J = 16.0$  Hz, 1H), 6.21-6.14 (m, 2H), 5.58 (d,  $J = 1.2$  Hz, 1H), 4.55 (td,  $J = 8.4, 7.2$  Hz, 1H), 4.21 (q,  $J = 7.1$  Hz, 2H), 3.01 (ddd,  $J = 15.6, 6.4, 0.8$  Hz, 1H), 2.66 (dd,  $J = 14.0, 8.0, 0.8$  Hz, 1H), 2.30 (s, 3H), 1.29 (t,  $J = 7.2$  Hz, 3H);  $^{13}\text{C}$  NMR (100 MHz,  $\text{CDCl}_3$ ):  $\delta$  200.3, 167.0, 137.5, 137.4, 136.7, 134.0, 133.3, 133.2, 129.2, 128.7, 128.0, 126.6, 126.2, 60.8, 49.6, 35.5, 21.2, 14.2; HRMS (ESI):  $m/z$  calcd for  $\text{C}_{23}\text{H}_{24}\text{O}_3\text{Na}$   $[\text{M}+\text{Na}]^+$  371.1623, found 371.2265.

[Reaction time: 5 min]; **3c**: 160 mg, 89%, a yellow oil; IR (thin film):  $\nu_{\max}$  2966, 1713, 1683, 1447, 1192, 1142, 969, 823, 707  $\text{cm}^{-1}$ ;  $^1\text{H}$  NMR (400 MHz,  $\text{CDCl}_3$ ):  $\delta$  8.04 (dt,  $J = 6.8, 1.2$  Hz, 2H), 7.57-7.52 (m, 1H), 7.50-7.42 (m, 2H), 7.24 (dt,  $J = 8.4, 2.0$  Hz, 2H), 7.11 (d,  $J = 8.0$  Hz, 2H), 6.43 (d,  $J = 16.0$  Hz, 1H), 6.21-6.14 (m, 2H), 5.58 (d,  $J = 1.2$  Hz, 1H), 4.55 (td,  $J = 8.0, 6.8$  Hz, 1H), 4.21 (q,  $J = 7.2$  Hz, 2H), 3.01 (ddd,  $J = 14.0, 6.4, 0.8$  Hz, 1H), 2.66 (ddd,  $J = 14.0, 8.0, 0.8$  Hz, 1H), 2.60 (q,  $J = 7.6$  Hz, 2H), 1.29 (t,  $J = 7.2$  Hz, 3H), 1.20 (t,  $J = 7.6$  Hz, 3H);  $^{13}\text{C}$  NMR (100 MHz,  $\text{CDCl}_3$ ):  $\delta$  200.2, 167.0, 144.0, 137.5, 136.7, 134.2, 133.3, 133.2, 128.7, 128.6, 128.0, 128.0, 126.6, 126.3, 60.8, 49.6, 35.4, 28.6, 15.6, 14.2; HRMS (ESI):  $m/z$  calcd for  $\text{C}_{24}\text{H}_{26}\text{O}_3\text{Na}$   $[\text{M}+\text{Na}]^+$  385.1780, found 385.1842.

[Reaction time: 1 h]; **3d**: 148 mg, 76%, a yellow oil; IR (thin film):  $\nu_{\max}$  2928, 1713, 1448, 1186, 1026, 967, 820, 705  $\text{cm}^{-1}$ ;  $^1\text{H}$  NMR (400 MHz,  $\text{CDCl}_3$ ):  $\delta$  8.04 (dt,  $J = 7.2, 1.2$  Hz, 2H), 7.57-7.52 (m, 1H), 7.48-7.43 (m, 2H), 7.23 (dt,  $J = 8.0, 2.4$  Hz, 2H), 7.08 (d,  $J = 8.4$  Hz, 2H), 6.43 (d,  $J = 16.0$  Hz, 1H), 6.17 (dd,  $J = 16.0, 9.2$  Hz, 1H), 6.17 (d,  $J = 1.2$  Hz, 1H), 5.58 (d,  $J = 1.2$  Hz, 1H), 4.55 (td,  $J = 8.4, 7.2$  Hz, 1H), 4.21 (q,  $J = 7.2$  Hz, 2H), 3.01 (ddd,  $J = 13.6, 6.4, 1.2$  Hz, 1H), 2.66 (ddd,  $J = 14.0, 8.0, 1.2$  Hz, 1H), 2.56 (t,  $J = 7.6$  Hz, 2H), 1.29 (t,  $J = 7.2$  Hz, 3H), 0.90 (t,  $J = 7.2$  Hz, 3H);  $^{13}\text{C}$  NMR (100 MHz,  $\text{CDCl}_3$ ):  $\delta$  200.1, 166.8, 142.5, 137.3, 136.5, 134.0, 133.2, 133.0, 128.5, 128.4, 128.4, 127.8, 126.4, 126.1, 60.6, 49.4, 35.2, 35.2, 33.4, 22.1, 14.1, 13.8; HRMS (ESI):  $m/z$  calcd for  $\text{C}_{26}\text{H}_{31}\text{O}_3\text{Na}$   $[\text{M}+\text{H}]^+$  391.2273, found 391.2289.

[Reaction time: 10 h]; **3e**: 80 mg, 44%, a yellow oil; IR (thin film):  $\nu_{\max}$  3932, 1712, 1599, 1449, 1192, 1045, 968, 778, 689  $\text{cm}^{-1}$ ;  $^1\text{H}$  NMR (400 MHz,  $\text{CDCl}_3$ ):  $\delta$  8.04 (dt,  $J = 6.8, 1.2$  Hz, 2H), 7.58-7.53 (m, 1H), 7.49-7.44 (m, 2H), 7.19 (t,  $J = 8.0$  Hz, 1H), 6.91 (d,  $J = 7.6$  Hz, 1H), 6.85 (t,  $J = 2.0$  Hz, 1H), 6.76 (ddd,  $J = 8.0, 2.4, 0.8$  Hz, 1H), 6.43 (d,  $J = 15.9$  Hz, 1H), 6.24 (dd,  $J = 16.0, 9.2$  Hz, 1H), 6.18 (d,  $J = 1.6$  Hz, 1H), 5.59 (d,  $J = 1.2$  Hz, 1H), 4.57 (td,  $J = 8.4, 6.4$  Hz, 1H), 4.21 (q,  $J = 7.2$  Hz, 2H), 3.79 (s, 3H), 3.01 (ddd,  $J = 14.0, 6.8, 1.2$  Hz, 1H), 2.67 (ddd,  $J = 14.0, 8.0, 1.2$  Hz, 1H), 1.29 (t,  $J = 7.2$  Hz, 3H);  $^{13}\text{C}$  NMR (100 MHz,  $\text{CDCl}_3$ ):  $\delta$  200.2, 167.0, 159.8, 138.2, 137.4, 136.6, 133.3, 133.3, 129.5, 128.7, 128.1, 128.0, 119.0, 113.4, 111.5, 60.8, 55.2, 49.5, 35.5, 14.2; HRMS (ESI):  $m/z$  calcd for  $\text{C}_{23}\text{H}_{24}\text{O}_4\text{K}$   $[\text{M}+\text{K}]^+$  403.1312, found 403.1310.

[Reaction time: 5 min]; **3f**: 148 mg, 81%, a yellow oil; IR (thin film):  $\nu_{\max}$  2931, 1712, 1512, 1250, 1180, 1032, 967, 827, 708  $\text{cm}^{-1}$ ;  $^1\text{H}$  NMR (400 MHz,  $\text{CDCl}_3$ ):  $\delta$  8.04 (dt,  $J = 6.8, 1.6$  Hz, 2H), 7.58-7.53 (m, 1H), 7.48-7.44 (m, 2H), 7.25 (d,  $J = 6.8$  Hz, 1H), 6.81 (dt,  $J = 8.8, 2.8$  Hz, 2H), 6.40 (d,  $J = 16.0$  Hz, 1H), 6.17 (d,  $J = 1.6$  Hz, 1H), 6.08 (dd,  $J = 16.0, 9.2$  Hz, 1H), 5.58 (d,  $J = 1.2$  Hz, 1H), 4.54 (td,  $J = 8.4, 7.2$  Hz, 1H), 4.20 (q,  $J = 7.2$  Hz, 2H), 3.78 (s, 3H), 3.00 (ddd,  $J = 14.0, 6.4, 1.2$  Hz, 1H), 2.66 (ddd,  $J = 14.0, 8.0, 1.2$  Hz, 1H), 1.29 (t,  $J = 7.2$  Hz, 3H);  $^{13}\text{C}$  NMR (100 MHz,  $\text{CDCl}_3$ ):  $\delta$  200.3, 167.0, 159.3, 137.5, 136.7, 133.2, 132.8, 129.6, 128.7, 128.6, 127.9, 127.5, 125.4, 113.9, 60.8, 55.3, 49.6, 35.5, 29.7, 14.2; HRMS (ESI):  $m/z$  calcd for  $\text{C}_{23}\text{H}_{24}\text{O}_4\text{Na}$   $[\text{M}+\text{Na}]^+$  387.1572, found 387.1534.

[Reaction time: 5 min]; **3g**: 132 mg, 75%, a yellow oil; IR (thin film):  $\nu_{\max}$  2983, 1712, 1583, 1445, 1195, 1143, 966, 780, 687  $\text{cm}^{-1}$ ;  $^1\text{H}$  NMR (400 MHz,  $\text{CDCl}_3$ ):  $\delta$  8.04 (dt,  $J = 7.2, 1.2$  Hz, 2H), 7.59-7.55 (m, 1H), 7.50-7.45 (m, 2H), 7.23 (td,  $J = 8.0, 6.0$  Hz, 1H), 7.07 (dt,  $J = 7.6, 1.6$  Hz, 1H), 7.02 (ddd,  $J = 10.0, 2.4, 1.6$  Hz, 1H), 6.90 (tdd,  $J = 8.4, 2.4, 1.0$  Hz, 1H), 6.42 (d,  $J = 16.0$  Hz, 1H), 6.27 (dd,  $J = 15.9, 8.9$  Hz, 1H), 6.18 (d,  $J = 1.2$  Hz, 1H), 5.59 (d,  $J = 1.6$  Hz, 1H), 4.58 (td,  $J = 8.0, 6.0$  Hz, 1H), 4.21 (q,  $J = 7.2$  Hz, 2H), 3.01 (ddd,  $J = 14.0, 6.4, 1.2$  Hz, 1H), 2.66 (ddd,  $J = 13.6, 8.0, 1.0$  Hz, 1H), 1.29 (t,  $J = 7.2$  Hz, 3H);  $^{13}\text{C}$  NMR (100 MHz,  $\text{CDCl}_3$ ):  $\delta$  200.1, 167.0, 139.2 (d,  $J = 8.0$  Hz), 137.4, 136.6, 133.5, 132.1 (d,  $J = 3.0$  Hz), 130.1 (d,  $J = 8.0$  Hz), 129.3, 128.9, 128.7, 128.3, 125.8, 122.2 (d,  $J = 3.0$

Hz), 114.5 (d,  $J = 21.0$  Hz), 112.9 (d,  $J = 22.0$  Hz), 61.0, 49.5, 35.6, 14.3;  $^{19}\text{F}$  NMR (376 MHz,  $\text{CDCl}_3$ ): -113.5; HRMS (ESI):  $m/z$  calcd for  $\text{C}_{22}\text{H}_{21}\text{FO}_3\text{Na}$  [ $\text{M}+\text{Na}$ ] $^+$  375.1372, found 375.1361.

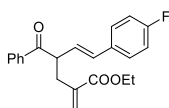

[Reaction time: 5 min]; **3h**: 141 mg, 80%, a yellow oil; IR (thin film):  $\nu_{\text{max}}$  2983, 1713, 1509, 1447, 1143, 1026, 969, 831, 711  $\text{cm}^{-1}$ ;  $^1\text{H}$  NMR (400 MHz,  $\text{CDCl}_3$ ):  $\delta$  8.04 (dt,  $J = 7.2, 1.2$  Hz, 2H), 7.58-7.54 (m, 1H), 7.50-7.45 (m, 2H), 7.30-7.26 (m, 2H), 7.00-6.93 (m, 2H), 6.41 (d,  $J = 16.0$  Hz, 1H), 6.18 (d,  $J = 1.6$  Hz, 1H), 6.16 (dd,  $J = 16.0, 9.2$  Hz, 1H), 5.58 (d,  $J = 1.2$  Hz, 1H),

4.56 (td,  $J = 8.8, 7.6$  Hz, 1H), 4.21 (q,  $J = 7.1$  Hz, 2H), 3.00 (ddd,  $J = 14.0, 6.4, 1.2$  Hz, 1H), 2.67 (ddd,  $J = 13.6, 8.0, 1.2$  Hz, 1H), 1.29 (t,  $J = 7.2$  Hz, 3H);  $^{13}\text{C}$  NMR (100 MHz,  $\text{CDCl}_3$ ):  $\delta$  200.1, 167.0, 137.4, 136.5, 133.3, 132.9 (d,  $J = 3.0$  Hz), 132.1, 128.7, 128.6, 128.0, 127.9, 127.8, 127.4 (d,  $J = 3.0$  Hz), 115.5 (d,  $J = 22.0$  Hz), 60.8, 49.5, 35.5, 14.2;  $^{19}\text{F}$  NMR (376 MHz,  $\text{CDCl}_3$ ): -114.3; HRMS (ESI):  $m/z$  calcd for  $\text{C}_{22}\text{H}_{22}\text{FO}_3$  [ $\text{M}+\text{H}$ ] $^+$  353.1553, found 353.1614.

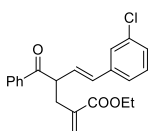

[Reaction time: 10 h]; **3i**: 88 mg, 48%, a yellow oil; IR (thin film):  $\nu_{\text{max}}$  2982, 1712, 1595, 1447, 1190, 1143, 967, 779, 687  $\text{cm}^{-1}$ ;  $^1\text{H}$  NMR (400 MHz,  $\text{CDCl}_3$ ):  $\delta$  8.04 (dt,  $J = 7.2, 1.2$  Hz, 2H), 7.60-7.55 (m, 1H), 7.50-7.45 (m, 2H), 7.30 (d,  $J = 2.0$  Hz, 1H), 7.23-7.15 (m, 3H), 6.39 (d,  $J = 16.0$  Hz, 1H), 6.27 (dd,  $J = 16.0, 8.8$  Hz, 1H), 6.19 (d,  $J = 1.2$  Hz, 1H), 5.59 (d,  $J = 1.2$  Hz, 1H), 4.57 (td,  $J = 8.4, 6.4$  Hz, 1H), 4.22 (q,  $J = 7.2$  Hz, 2H), 3.01 (ddd,  $J = 13.6, 6.4, 1.2$  Hz, 1H), 2.66

(ddd,  $J = 14.0, 8.0, 1.2$  Hz, 1H), 1.30 (t,  $J = 7.1$  Hz, 3H);  $^{13}\text{C}$  NMR (100 MHz,  $\text{CDCl}_3$ ):  $\delta$  199.9, 166.9, 138.6, 137.3, 136.4, 134.5, 133.3, 131.9, 129.7, 129.3, 128.7, 128.6, 128.1, 127.6, 126.3, 124.5, 60.8, 49.4, 35.5, 14.2; HRMS (ESI):  $m/z$  calcd for  $\text{C}_{22}\text{H}_{22}\text{ClO}_3$  [ $\text{M}+\text{H}$ ] $^+$  369.1257, found 369.1239.

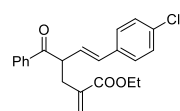

[Reaction time: 5 min]; **3j**: 125 mg, 68%, a yellow oil; IR (thin film):  $\nu_{\text{max}}$  2982, 1713, 1491, 1370, 1279, 1189, 968, 820, 693  $\text{cm}^{-1}$ ;  $^1\text{H}$  NMR (400 MHz,  $\text{CDCl}_3$ ):  $\delta$  7.79 (dt,  $J = 7.2, 1.2$  Hz, 2H), 7.55-7.50 (m, 1H), 7.40-7.35 (m, 2H), 7.30 (dt,  $J = 8.4, 2.4$  Hz, 2H), 7.15 (dt,  $J = 8.4, 2.8$  Hz, 2H), 6.57 (d,  $J = 11.2$  Hz, 1H), 6.16 (d,  $J = 1.2$  Hz, 1H), 5.72 (dd,  $J = 11.6, 10.8$  Hz, 1H), 5.59 (d,  $J = 1.2$  Hz, 1H), 4.93 (dt,  $J = 10.8, 6.8$  Hz, 1H), 4.11 (q,  $J = 7.2$  Hz, 2H), 2.99

(ddd,  $J = 13.6, 6.8, 1.2$  Hz, 1H), 2.58 (ddd,  $J = 14.0, 8.0, 1.2$  Hz, 1H), 1.23 (t,  $J = 7.2$  Hz, 3H);  $^{13}\text{C}$  NMR (100 MHz,  $\text{CDCl}_3$ ):  $\delta$  200.0, 166.9, 137.3, 136.5, 135.2, 133.3, 133.3, 132.0, 128.7, 128.7, 128.6, 128.4, 128.1, 127.5, 60.8, 49.5, 35.5, 14.2; HRMS (ESI):  $m/z$  calcd for  $\text{C}_{22}\text{H}_{21}\text{ClO}_3\text{Na}$  [ $\text{M}+\text{Na}$ ] $^+$  391.1077, found 391.1144.

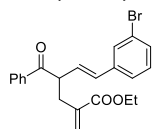

[Reaction time: 10 h]; **3k**: 92 mg, 45%, a yellow oil; IR (thin film):  $\nu_{\text{max}}$  2930, 1712, 1594, 1446, 1279, 1190, 967, 777, 688  $\text{cm}^{-1}$ ;  $^1\text{H}$  NMR (400 MHz,  $\text{CDCl}_3$ ):  $\delta$  8.04 (dt,  $J = 6.8, 1.2$  Hz, 2H), 7.59-7.55 (m, 1H), 7.49 (t,  $J = 1.6$  Hz, 1H), 7.47 (dt,  $J = 5.6, 1.6$  Hz, 2H), 7.33 (ddd,  $J = 8.0, 2.0, 1.2$  Hz, 1H), 7.23 (dt,  $J = 7.6, 1.6$  Hz, 1H), 7.14 (t,  $J = 7.8$  Hz, 1H), 6.38 (d,  $J = 16.0$  Hz, 1H), 6.26 (dd,  $J = 15.6, 8.4$  Hz, 1H), 6.19 (d,  $J = 1.2$  Hz, 1H), 5.59 (d,  $J = 1.2$  Hz, 1H), 4.57 (td,  $J = 8.4, 6.4$

Hz, 1H), 4.22 (q,  $J = 7.2$  Hz, 2H), 3.01 (ddd,  $J = 13.8, 6.4, 1.2$  Hz, 1H), 2.66 (ddd,  $J = 13.8, 8.0, 1.0$  Hz, 1H), 1.30 (t,  $J = 7.2$  Hz, 3H);  $^{13}\text{C}$  NMR (100 MHz,  $\text{CDCl}_3$ ):  $\delta$  197.6, 164.6, 136.6, 135.0, 134.1, 131.1, 129.6, 128.2, 127.7, 127.0, 126.9, 126.4, 126.3, 125.9, 122.7, 120.4, 58.6, 47.2, 33.3, 11.9; HRMS (ESI):  $m/z$  calcd for  $\text{C}_{22}\text{H}_{22}\text{BrO}_3$  [ $\text{M}+\text{H}$ ] $^+$  413.0752, found 413.0700.

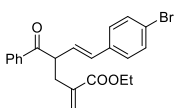

[Reaction time: 5 min]; **3l**: 106 mg, 51%, a yellow oil; IR (thin film):  $\nu_{\text{max}}$  2755, 1881, 1257, 1167, 1024, 952, 823, 686, 641  $\text{cm}^{-1}$ ;  $^1\text{H}$  NMR (400 MHz,  $\text{CDCl}_3$ ):  $\delta$  8.04 (dt,  $J = 7.2, 1.2$  Hz, 2H), 7.59-7.54 (m, 1H), 7.50-7.45 (m, 2H), 7.39 (dt,  $J = 9.0, 2.4$  Hz, 2H), 7.18 (dt,  $J = 8.4, 2.8$  Hz, 2H), 6.39 (d,  $J = 16.0$  Hz, 1H), 6.25 (dd,  $J = 16.0, 8.8$  Hz, 1H), 6.18 (d,  $J = 1.2$  Hz, 1H), 5.58 (d,  $J = 1.2$  Hz, 1H), 4.56 (td,  $J = 8.0, 6.4$  Hz, 1H), 4.21 (q,  $J = 7.2$  Hz, 2H), 3.00 (ddd,  $J = 14.0,$

6.4, 1.2 Hz, 1H), 2.66 (ddd,  $J = 13.6, 8.0, 1.0$  Hz, 1H), 2.9 (t,  $J = 7.2$  Hz, 3H);  $^{13}\text{C}$  NMR (100 MHz,  $\text{CDCl}_3$ ):  $\delta$  198.3, 165.2, 135.6, 134.8, 134.0, 131.6, 130.4, 130.0, 127.0, 126.9, 126.8, 126.4, 126.1, 119.7, 59.1, 47.8, 33.8, 12.5; HRMS (ESI):  $m/z$  calcd for  $\text{C}_{22}\text{H}_{21}\text{BrO}_3\text{Na}$  [ $\text{M}+\text{Na}$ ] $^+$  435.0572, found 435.0559.

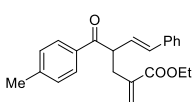

[Reaction time: 24 h]; **3m**: 126 mg, 72%, a yellow oil; IR (thin film):  $\nu_{\text{max}}$  2983, 1713, 1607, 1447, 1370, 1184, 967, 824, 744  $\text{cm}^{-1}$ ;  $^1\text{H}$  NMR (400 MHz,  $\text{CDCl}_3$ ):  $\delta$  7.95 (dt,  $J = 8.4, 2.0$  Hz, 2H), 7.33-7.28 (m, 3H), 7.27 (d,  $J = 0.8$  Hz, 2H), 7.25 (d,  $J = 1.6$  Hz, 1H), 7.22-7.17 (m, 1H), 6.45 (d,  $J = 16.0$  Hz, 1H), 6.24 (dd,  $J = 16.0, 8.8$  Hz, 1H), 6.17 (d,  $J = 1.6$  Hz, 1H), 5.58

(d,  $J = 1.2$  Hz, 1H), 4.54 (td,  $J = 8.4, 7.2$  Hz, 1H), 4.21 (q,  $J = 7.2$  Hz, 2H), 3.00 (ddd,  $J = 14.0, 6.4, 1.2$  Hz, 1H), 2.66 (ddd,  $J = 13.6, 8.0, 1.2$  Hz, 1H), 2.40 (s, 3H), 1.29 (t,  $J = 7.2$  Hz, 3H);  $^{13}\text{C}$  NMR (100 MHz,  $\text{CDCl}_3$ ):  $\delta$  199.8, 167.0, 144.1, 137.5, 136.8, 134.1, 133.2, 129.4, 128.8, 128.5, 127.9, 127.9, 127.6, 126.3, 60.8, 49.4, 35.4, 21.7, 14.2. HRMS (ESI):  $m/z$  calcd for  $\text{C}_{23}\text{H}_{24}\text{O}_3\text{Na}$  [ $\text{M}+\text{Na}$ ] $^+$  371.1623, found 371.1579.

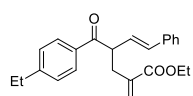

[Reaction time: 24 h]; **3n**: 117 mg, 65%, a yellow oil; IR (thin film):  $\nu_{\text{max}}$  2970, 1713, 1679, 1606, 1370, 1184, 967, 746, 694  $\text{cm}^{-1}$ ;  $^1\text{H}$  NMR (400 MHz,  $\text{CDCl}_3$ ):  $\delta$  7.98 (dt,  $J = 8.4, 2.0$  Hz, 2H), 7.33 (d,  $J = 1.8$  Hz, 1H), 7.31-7.28 (m, 2H), 7.28-7.26 (m, 2H), 7.25-7.17 (m, 2H), 6.45 (d,  $J = 16.0$  Hz, 1H), 6.24 (dd,  $J = 16.0, 9.2$  Hz, 1H), 6.17 (d,  $J = 1.2$  Hz, 1H), 5.58 (d,  $J = 1.2$  Hz, 1H), 4.55 (dddd,  $J = 8.8, 7.5, 6.5, 0.8$  Hz, 1H), 4.21 (q,  $J = 7.2$  Hz, 2H), 3.01 (ddd,  $J = 14.0, 6.4, 1.2$  Hz, 1H), 2.73-2.64 (m, 3H), 1.29 (t,  $J = 7.1$  Hz, 3H), 1.25 (t,  $J = 7.6$  Hz, 3H);  $^{13}\text{C}$  NMR (100 MHz,  $\text{CDCl}_3$ ):  $\delta$  199.8,



167.0, 150.2, 137.5, 136.8, 134.3, 133.2, 128.9, 128.5, 128.2, 128.0, 127.9, 127.6, 126.3, 60.8, 49.5, 35.4, 29.0, 15.2, 14.2; HRMS (ESI):  $m/z$  calcd for  $C_{24}H_{27}O_3$   $[M+H]^+$  363.1960, found 363.1975.

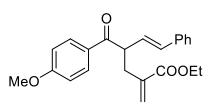

[Reaction time: 10 h]; **3o**: 112 mg, 61%, a yellow oil; IR (thin film):  $\nu_{max}$  2933, 1711, 1600, 1510, 1257, 1172, 968, 841, 746  $cm^{-1}$ ;  $^1H$  NMR (400 MHz,  $CDCl_3$ ):  $\delta$  8.04 (dt,  $J = 8.8, 3.2$  Hz, 2H), 7.33-7.30 (m, 2H), 7.29-7.26 (m, 2H), 7.22-7.18 (m, 2H), 6.94 (dt,  $J = 8.8, 2.8$  Hz, 2H), 6.44 (d,  $J = 15.6$  Hz, 1H), 6.25 (dd,  $J = 15.6, 8.8$  Hz, 1H), 6.17 (d,  $J = 1.6$  Hz, 1H), 5.58

(d,  $J = 1.2$  Hz, 1H), 4.52 (ddd,  $J = 9.2, 8.0, 6.4$  Hz, 1H), 4.21 (q,  $J = 7.2$  Hz, 2H), 3.86 (s, 3H), 3.00 (ddd,  $J = 13.6, 6.4, 1.2$  Hz, 1H), 2.65 (ddd,  $J = 13.6, 8.0, 1.0$  Hz, 1H), 1.29 (t,  $J = 7.2$  Hz, 3H);  $^{13}C$  NMR (100 MHz,  $CDCl_3$ ):  $\delta$  198.7, 167.0, 163.6, 137.5, 136.8, 133.0, 131.0, 129.6, 128.5, 128.1, 127.9, 127.6, 126.3, 113.9, 60.8, 55.5, 49.2, 35.5, 14.2; HRMS (ESI):  $m/z$  calcd for  $C_{23}H_{25}O_4$   $[M+H]^+$  365.1753, found 365.1722.

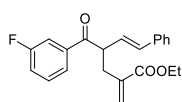

[Reaction time: 10 h]; **3p**: 129 mg, 73%, a yellow oil; IR (thin film):  $\nu_{max}$  2933, 1711, 1587, 1441, 1261, 1141, 968, 743, 693  $cm^{-1}$ ;  $^1H$  NMR (400 MHz,  $CDCl_3$ ):  $\delta$  7.84 (dt,  $J = 7.8, 1.2$  Hz, 1H), 7.71 (ddd,  $J = 9.6, 2.8, 1.6$  Hz, 1H), 7.44 (td,  $J = 8.0, 5.6$  Hz, 1H), 7.33-7.30 (m, 2H), 7.30-7.27 (m, 2H), 7.25-7.19 (m, 2H), 6.45 (d,  $J = 16.0$  Hz, 1H), 6.25-6.21 (m, 1H), 6.19 (d,

$J = 1.6$  Hz, 1H), 5.59 (d,  $J = 1.2$  Hz, 1H), 4.51 (ddd,  $J = 9.2, 8.4, 6.8$  Hz, 1H), 4.22 (q,  $J = 7.1$  Hz, 2H), 3.00 (ddd,  $J = 14.0, 6.4, 1.2$  Hz, 1H), 2.66 (ddd,  $J = 14.0, 8.0, 1.2$  Hz, 1H), 1.29 (t,  $J = 7.2$  Hz, 3H);  $^{13}C$  NMR (100 MHz,  $CDCl_3$ ):  $\delta$  198.9 (d,  $J = 1.0$  Hz), 166.9, 138.7 (d,  $J = 6.0$  Hz), 137.2, 136.6, 133.7, 130.3 (d,  $J = 8.0$  Hz), 128.6, 128.3, 127.8, 127.1, 126.3, 124.3 (d,  $J = 3.0$  Hz), 120.2 (d,  $J = 20.0$  Hz), 115.3 (d,  $J = 23.0$  Hz), 60.9, 49.8, 35.5, 14.2;  $^{19}F$  NMR (376 MHz,  $CDCl_3$ ): -111.7; HRMS (ESI):  $m/z$  calcd for  $C_{22}H_{22}FO_3$   $[M+H]^+$  353.1553 found 353.1544.

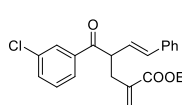

[Reaction time: 10 h]; **3q**: 117 mg, 64%, a yellow oil; IR (thin film):  $\nu_{max}$  2929, 1713, 1571, 1420, 1194, 1144, 967, 751, 694  $cm^{-1}$ ;  $^1H$  NMR (400 MHz,  $CDCl_3$ ):  $\delta$  7.99 (t,  $J = 1.8$  Hz, 1H), 7.92 (dt,  $J = 8.0, 1.2$  Hz, 1H), 7.52 (ddd,  $J = 8.0, 2.0, 1.0$  Hz, 1H), 7.41 (t,  $J = 8.0$  Hz, 1H), 7.34-7.30 (m, 2H), 7.30-7.26 (m, 2H), 7.24-7.19 (m, 1H), 6.45 (d,  $J = 16.0$  Hz, 1H), 6.21 (dd,

$J = 16.0, 9.2$  Hz, 1H), 6.19 (d,  $J = 1.2$  Hz, 1H), 5.59 (d,  $J = 1.2$  Hz, 1H), 4.51 (ddd,  $J = 9.6, 8.4, 6.4$  Hz, 1H), 4.22 (q,  $J = 7.1$  Hz, 2H), 2.99 (ddd,  $J = 14.0, 6.8, 1.2$  Hz, 1H), 2.66 (ddd,  $J = 14.0, 8.0, 1.2$  Hz, 1H), 1.30 (t,  $J = 7.2$  Hz, 3H);  $^{13}C$  NMR (100 MHz,  $CDCl_3$ ):  $\delta$  198.9, 166.9, 138.2, 137.2, 136.6, 135.1, 133.7, 133.1, 130.0, 128.7, 128.6, 128.2, 127.8, 127.1, 126.7, 126.4, 60.9, 49.7, 35.5, 14.2; HRMS (ESI):  $m/z$  calcd for  $C_{22}H_{22}ClO_3$   $[M+H]^+$  369.1257, found 369.1230.

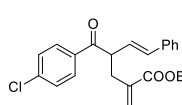

[Reaction time: 24 h]; **3r**: 94 mg, 51%, a yellow oil; IR (thin film):  $\nu_{max}$  2981, 1712, 1589, 1401, 1195, 1144, 967, 747, 695  $cm^{-1}$ ;  $^1H$  NMR (400 MHz,  $CDCl_3$ ):  $\delta$  7.99 (dt,  $J = 8.8, 2.4$  Hz, 2H), 7.44 (dt,  $J = 8.4, 1.2$  Hz, 2H), 7.33-7.30 (m, 2H), 7.30-7.27 (m, 2H), 7.23-7.19 (m, 1H), 6.44 (d,  $J = 16.0$  Hz, 1H), 7.24-7.20 (m, 1H), 6.18 (d,  $J = 1.2$  Hz, 1H), 5.58 (d,  $J = 1.2$  Hz,

1H), 4.51 (td,  $J = 8.4, 6.4$  Hz, 1H), 4.21 (q,  $J = 7.1$  Hz, 2H), 2.99 (ddd,  $J = 14.0, 6.4, 1.2$  Hz, 1H), 2.65 (ddd,  $J = 14.0, 8.0, 1.2$  Hz, 1H), 1.30 (t,  $J = 7.2$  Hz, 3H);  $^{13}C$  NMR (100 MHz,  $CDCl_3$ ):  $\delta$  199.0, 167.0, 139.7, 137.2, 136.6, 134.9, 133.6, 130.1, 129.0, 128.6, 128.8, 127.8, 127.3, 126.3, 60.9, 49.6, 35.5, 14.2; HRMS (ESI):  $m/z$  calcd for  $C_{22}H_{22}ClO_3$   $[M+H]^+$  369.1257, found 369.1232.

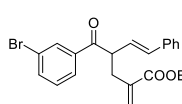

[Reaction time: 10 h]; **3s**: 108 mg, 53%, a yellow oil; IR (thin film):  $\nu_{max}$  2928, 1713, 1685, 1370, 1247, 1192, 966, 748, 704  $cm^{-1}$ ;  $^1H$  NMR (400 MHz,  $CDCl_3$ ):  $\delta$  8.15 (t,  $J = 2.0$  Hz, 1H), 7.97 (dt,  $J = 8.0, 1.2$  Hz, 1H), 7.67 (ddd,  $J = 8.0, 2.0, 1.0$  Hz, 1H), 7.35 (d,  $J = 7.9$  Hz, 1H), 7.35-7.25 (m, 4H), 7.24-7.19 (m, 1H), 6.45 (d,  $J = 16.0$  Hz, 1H), 6.21 (dd,  $J = 16.0, 9.2$  Hz,

1H), 6.18 (d,  $J = 1.6$  Hz, 1H), 5.59 (d,  $J = 1.2$  Hz, 1H), 4.50 (q,  $J = 7.8$  Hz, 1H), 4.22 (q,  $J = 7.2$  Hz, 2H), 2.99 (ddd,  $J = 14.0, 6.4, 1.2$  Hz, 1H), 2.66 (ddd,  $J = 13.8, 8.0, 1.0$  Hz, 1H), 1.30 (t,  $J = 7.2$  Hz, 3H);  $^{13}C$  NMR (100 MHz,  $CDCl_3$ ):  $\delta$  198.8, 166.9, 138.4, 137.2, 136.6, 136.1, 133.7, 131.6, 130.3, 128.6, 127.8, 127.2, 127.1, 126.4, 123.1, 60.9, 49.7, 35.5, 14.2;  $^1HRMS$  (ESI):  $m/z$  calcd for  $C_{22}H_{21}BrO_3Na$   $[M+Na]^+$  435.0572, found 435.0557.

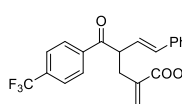

[Reaction time: 10 h]; **3t**: 120 mg, 60%, a yellow oil; IR (thin film):  $\nu_{max}$  2983, 1748, 1370, 1326, 1278, 1167, 1068, 964, 859  $cm^{-1}$ ;  $^1H$  NMR (400 MHz,  $CDCl_3$ ):  $\delta$  8.16-8.14 (m, 2H), 7.74-7.72 (m, 2H), 7.33-7.31 (m, 2H), 7.29-7.26 (m, 2H), 7.24-7.20 (m, 1H), 6.46 (d,  $J = 16.0$  Hz, 1H), 6.22 (dd,  $J = 16.0, 9.2$  Hz, 1H), 6.19 (d,  $J = 1.6$  Hz, 1H), 5.60 (d,  $J = 1.2$  Hz,

1H), 4.56 (ddd,  $J = 9.2, 8.0, 6.4$  Hz, 1H), 4.21 (q,  $J = 7.1$  Hz, 2H), 3.02 (ddd,  $J = 13.6, 6.4, 1.2$  Hz, 1H), 2.67 (ddd,  $J = 14.0, 8.0, 1.2$  Hz, 1H), 1.29 (t,  $J = 7.2$  Hz, 3H);  $^{13}C$  NMR (100 MHz,  $CDCl_3$ ):  $\delta$  199.3, 166.9, 139.3, 137.1, 136.5, 134.0, 129.0, 128.6, 128.3, 127.9, 126.8, 126.4, 125.8, 125.8, 125.7, 60.9, 50.0, 35.5, 14.2;  $^{19}F$  NMR (376 MHz,  $CDCl_3$ ): -63.2; HRMS (ESI):  $m/z$  calcd for  $C_{23}H_{21}F_3O_3Na$   $[M+Na]^+$  425.1340, found 425.1323.

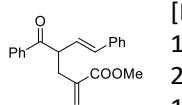

[Reaction time: 5 min]; **5a**: 154 mg, 96%, a yellow oil; IR (thin film):  $\nu_{max}$  3461, 2953, 1718, 1598, 1493, 1446, 1205, 750, 694  $cm^{-1}$ ;  $^1H$  NMR (400 MHz,  $CDCl_3$ ):  $\delta$  8.04 (dt,  $J = 7.2, 1.2$  Hz, 2H), 7.58-7.53 (m, 1H), 7.49-7.44 (m, 2H), 7.33-7.30 (m, 2H), 7.27-7.25 (m, 2H), 7.22-7.18 (m, 1H), 6.46 (d,  $J = 16.0$  Hz, 1H), 6.23 (dd,  $J = 16.0, 8.8$  Hz, 1H), 6.18 (d,  $J = 1.2$  Hz, 1H), 5.61 (d,  $J = 1.2$  Hz, 1H), 4.60-4.53 (m, 1H), 3.75 (s, 3H), 3.02 (ddd,  $J = 14.0, 6.4, 1.2$  Hz, 1H), 2.68 (ddd,  $J = 14.0, 8.0, 1.2$  Hz, 1H);  $^{13}C$  NMR (100 MHz,  $CDCl_3$ ):  $\delta$  200.1, 167.5, 137.1, 136.7, 136.6, 133.4, 133.2, 128.7, 128.6, 128.5,

128.3, 127.7, 127.6, 126.3, 51.9, 49.6, 35.4; HRMS (ESI):  $m/z$  calcd for  $C_{21}H_{20}O_3Na$   $[M+Na]^+$  343.1310, found 343.1301.

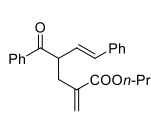

[Reaction time: 5 min]; **5b**: 161 mg, 92%, a yellow oil; IR (thin film):  $\nu_{max}$  2968, 1713, 1449, 1265, 1192, 1142, 967, 746, 692  $cm^{-1}$ ;  $^1H$  NMR (400 MHz,  $CDCl_3$ ):  $\delta$  8.08 (d,  $J = 7.2$  Hz, 2H), 7.59 (dt,  $J = 7.5, 3.8$  Hz, 1H), 7.50 (t,  $J = 8.0$  Hz, 2H), 7.37-7.33 (m, 2H), 7.32-7.30 (m, 2H), 7.27-7.23 (m, 1H), 6.50 (dd,  $J = 16.0, 2.4$  Hz, 1H), 6.34-6.25 (m, 1H), 6.22 (s, 1H), 5.63 (s, 1H), 4.62 (d,  $J = 8.0$  Hz, 1H), 4.16 (td,  $J = 6.6, 2.6$  Hz, 2H), 3.06 (dd,  $J = 14.0, 6.4$  Hz, 1H), 2.72 (dd,  $J = 14.4, 8.0$  Hz, 1H), 1.78-1.68 (m, 2H), 0.99 (td,  $J = 7.6, 2.6$  Hz, 3H);  $^{13}C$  NMR (100 MHz,  $CDCl_3$ ):  $\delta$  200.2, 167.1, 137.4, 136.7, 136.6, 133.4, 133.2, 128.7, 128.6, 128.5, 128.0, 127.7, 126.3, 66.4, 49.6, 35.5, 22.0, 10.5; HRMS (ESI):  $m/z$  calcd for  $C_{23}H_{24}O_3Na$   $[M+Na]^+$  371.1623, found 371.1615.

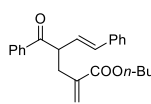

[Reaction time: 5 min]; **5c**: 170 mg, 94%, a yellow oil; IR (thin film):  $\nu_{max}$  2961, 1713, 1633, 1450, 1275, 1185, 966, 746, 692  $cm^{-1}$ ;  $^1H$  NMR (400 MHz,  $CDCl_3$ ):  $\delta$  8.09 (d,  $J = 7.6$  Hz, 2H), 7.60 (t,  $J = 7.2$  Hz, 1H), 7.51 (t,  $J = 7.2$  Hz, 2H), 7.34-7.34 (m, 2H), 7.32-7.30 (m, 2H), 7.27-7.23 (m, 1H), 6.50 (d,  $J = 16.0$  Hz, 1H), 6.32-6.25 (m, 1H), 6.22 (s, 1H), 5.63 (s, 1H), 4.62 (dd,  $J = 15.8, 9.0$  Hz, 1H), 4.21 ( $\psi$ q,  $J = 7.6$  Hz, 2H), 3.06 (dd,  $J = 14.0, 6.4$  Hz, 1H), 2.72 (dd,  $J = 14.0, 8.0$  Hz, 1H), 1.69 (q,  $J = 7.5$  Hz, 2H), 1.47-1.42 (m, 2H), 0.98 (dt,  $J = 9.6, 7.2$  Hz, 4H);  $^{13}C$  NMR (100 MHz,  $CDCl_3$ ):  $\delta$  200.2, 167.1, 137.4, 136.7, 136.6, 133.4, 133.2, 128.7, 128.6, 128.5, 128.0, 127.7, 126.3, 64.7, 49.6, 35.5, 30.7, 19.2, 13.7; HRMS (ESI):  $m/z$  calcd for  $C_{24}H_{26}O_3Na$   $[M+Na]^+$  385.1780, found 385.1768.

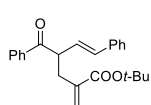

[Reaction time: 5 min]; **5d**: 167 mg, 92%, a yellow oil; IR (thin film):  $\nu_{max}$  2978, 1707, 1449, 1368, 1253, 1143, 967, 748, 692  $cm^{-1}$ ;  $^1H$  NMR (400 MHz,  $CDCl_3$ ):  $\delta$  8.05 (dt,  $J = 5.4, 1.0$  Hz, 2H), 7.59-7.56 (m, 1H), 7.50-7.47 (m, 2H), 7.35-7.33 (m, 2H), 7.31-7.28 (m, 2H), 7.24-7.21 (m, 1H), 6.49 (d,  $J = 10.8$  Hz, 1H), 6.26 (dd,  $J = 10.4, 6.0$  Hz, 1H), 6.10 (d,  $J = 1.2$  Hz, 1H), 5.54 (d,  $J = 0.8$  Hz, 1H), 4.62 (td,  $J = 6.2, 5.0$  Hz, 1H), 2.99 (ddd,  $J = 9.2, 4.4, 0.8$  Hz, 1H), 2.68 (ddd,  $J = 9.2, 4.8, 0.6$  Hz, 1H), 1.51 (s, 9H);  $^{13}C$  NMR (100 MHz,  $CDCl_3$ ):  $\delta$  200.4, 166.2, 138.8, 136.8, 136.8, 133.2, 128.7, 128.6, 128.5, 127.9, 127.6, 127.2, 126.3, 49.7, 35.7, 28.1; HRMS (ESI):  $m/z$  calcd for  $C_{24}H_{26}O_3Na$   $[M+Na]^+$  385.1780, found 385.1762.

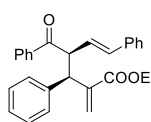

[Reaction time: 5 min]; **5e**: 157 mg, 77%, a white solid,  $>20:1$  dr, m.p. 56.3-57.7°C; IR (thin film):  $\nu_{max}$  2982, 1709, 1670, 1448, 1256, 1141, 952, 746, 703  $cm^{-1}$ ;  $^1H$  NMR (400 MHz,  $CDCl_3$ ):  $\delta$  8.05 (dt,  $J = 7.2, 1.2$  Hz, 2H), 7.59-7.54 (m, 1H), 7.49-7.45 (m, 2H), 7.30-7.24 (m, 4H), 7.22-7.12 (m, 4H), 7.11-7.08 (m, 2H), 6.27 (d,  $J = 6.0$  Hz, 1H), 6.18 (s, 1H), 5.95 (dd,  $J = 16.0, 8.8$  Hz, 1H), 5.59 (d,  $J = 1.2$  Hz, 1H), 4.92 (dd,  $J = 11.2, 8.8$  Hz, 1H), 4.69 (d,  $J = 11.2$  Hz, 1H), 4.13-4.03 (m, 2H), 1.17 (t,  $J = 7.2$  Hz, 3H);  $^{13}C$  NMR (100 MHz,  $CDCl_3$ ):  $\delta$  199.2, 166.3, 142.5, 140.0, 137.0, 136.7, 134.5, 133.3, 129.0, 128.8, 128.4, 128.4, 128.3, 127.6, 126.8, 126.7, 126.2, 123.8, 60.9, 54.3, 49.3, 14.0; HRMS (ESI):  $m/z$  calcd for  $C_{28}H_{27}O_3$   $[M+H]^+$  411.1960, found 411.1919.

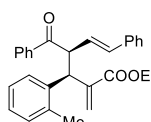

[Reaction time: 24 h]; **5f**: 119 mg, 56%, a yellow solid,  $>20:1$  dr, 59.3-62.1°C; IR (thin film):  $\nu_{max}$  2924, 1715, 1673, 1370, 1259, 1148, 970, 738, 689  $cm^{-1}$ ;  $^1H$  NMR (400 MHz,  $CDCl_3$ ):  $\delta$  8.04 (dt,  $J = 7.2, 1.2$  Hz, 2H), 7.59-7.55 (m, 1H), 7.50-7.45 (m, 2H), 7.26-7.21 (m, 1H), 7.21-7.18 (m, 1H), 7.17-7.11 (m, 3H), 7.08-7.03 (m, 4H), 6.21 (d,  $J = 0.8$  Hz, 1H), 6.16 (d,  $J = 16.4$  Hz, 1H), 5.92 (dd,  $J = 16.0, 8.8$  Hz, 1H), 5.52 (d,  $J = 1.2$  Hz, 1H), 5.01 (d,  $J = 10.8$  Hz, 1H), 4.80 (dd,  $J = 11.2, 8.4$  Hz, 1H), 4.11-4.02 (m, 2H), 2.43 (s, 3H), 1.16 (t,  $J = 7.2$  Hz, 3H);  $\delta$  199.4, 166.4, 142.7, 138.3, 137.4, 137.0, 136.7, 134.3, 133.3, 130.4, 128.8, 128.4, 128.4, 127.6, 127.3, 126.6, 126.2, 125.9, 125.7, 123.7, 60.9, 55.2, 43.7, 20.1, 14.0; HRMS (ESI):  $m/z$  calcd for  $C_{29}H_{28}O_3Na$   $[M+Na]^+$  447.1936, found 447.1920.

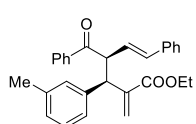

[Reaction time: 24 h]; **5g**: 142 mg, 67%, a yellow solid,  $>20:1$  dr, 62.2-63.5°C; IR (thin film):  $\nu_{max}$  2925, 1711, 1667, 1277, 1142, 963, 791, 714, 658  $cm^{-1}$ ;  $^1H$  NMR (400 MHz,  $CDCl_3$ ):  $\delta$  8.06 (dt,  $J = 7.2, 1.2$  Hz, 2H), 7.58-7.54 (m, 1H), 7.49-7.45 (m, 2H), 7.21-7.17 (m, 2H), 7.16-7.13 (m, 2H), 7.10-7.08 (m, 4H), 6.98-6.95 (m, 1H), 6.27 (d,  $J = 16.0$  Hz, 1H), 6.17 (s, 1H), 5.95 (dd,  $J = 16.0, 8.8$  Hz, 1H), 5.58 (d,  $J = 1.2$  Hz, 1H), 4.91 (dd,  $J = 11.2, 8.8$  Hz, 1H), 4.64 (d,  $J = 11.2$  Hz, 1H), 4.13-4.03 (m, 2H), 2.28 (s, 3H), 1.18 (t,  $J = 7.2$  Hz, 3H);  $^{13}C$  NMR (100 MHz,  $CDCl_3$ ):  $\delta$  199.2, 166.4, 142.6, 139.8, 137.7, 137.0, 136.8, 134.3, 133.2, 129.7, 128.8, 128.5, 128.4, 128.1, 127.6, 127.6, 126.9, 126.3, 126.1, 123.7, 60.8, 54.2, 49.2, 21.5, 14.0; HRMS (ESI):  $m/z$  calcd for  $C_{29}H_{28}O_3Na$   $[M+Na]^+$  447.1936, found 447.1925.

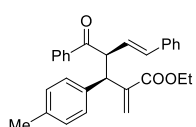

[Reaction time: 24 h]; **5h**: 112 mg, 53%, a yellow solid,  $>20:1$  dr, 63.1-64.2°C; IR (thin film):  $\nu_{max}$  2945, 1715, 1678, 1448, 1262, 1146, 967, 817, 691  $cm^{-1}$ ;  $^1H$  NMR (400 MHz,  $CDCl_3$ ):  $\delta$  8.05 (dt,  $J = 7.2, 1.2$  Hz, 2H), 7.58-7.54 (m, 1H), 7.49-7.45 (m, 2H), 7.21-7.18 (m, 2H), 7.16 (t,  $J = 2.2$  Hz, 2H), 7.13-7.11 (m, 2H), 7.05 (d,  $J = 8.0$  Hz, 2H), 6.29 (d,  $J = 16.0$  Hz, 1H), 6.15 (s, 1H), 5.97 (dd,  $J = 16.0, 8.4$  Hz, 1H), 5.58 (d,  $J = 1.2$  Hz, 1H), 4.92 (dd,  $J = 11.2, 8.8$  Hz, 1H), 4.64 (d,  $J = 11.2$  Hz, 1H), 4.12-4.04 (m, 2H), 2.27 (s, 3H), 1.18 (t,  $J = 7.2$  Hz, 3H);  $^{13}C$  NMR (100 MHz,  $CDCl_3$ ):  $\delta$  199.3, 166.4, 142.7, 137.0, 136.8, 136.8, 136.3, 134.3, 133.2, 129.0, 128.8, 128.8, 128.4, 127.6,

126.9, 126.3, 123.6, 60.8, 54.2, 48.9, 21.1, 14.0; HRMS (ESI):  $m/z$  calcd for  $C_{29}H_{28}O_3Na$   $[M+Na]^+$  447.1936, found 447.1924.

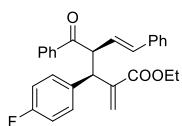

[Reaction time: 24 h]; **5i**: 113 mg, 53%, a yellow solid,  $>20:1$  dr, 56.3.2-58.5°C; IR (thin film):  $\nu_{max}$  2925, 1712, 1507, 1253, 1224, 1143, 965, 829, 962  $cm^{-1}$ ;  $^1H$  NMR (400 MHz,  $CDCl_3$ ):  $\delta$  8.05 (dt,  $J = 6.8, 1.2$  Hz, 2H), 7.59-7.55 (m, 1H), 7.50-7.45 (m, 2H), 7.27-7.22 (m, 2H), 7.21-7.19 (m, 2H), 7.18-7.14 (m, 1H), 7.11 (dt,  $J = 6.6, 1.8$  Hz, 2H), 6.97-6.91 (m, 2H), 6.27 (d,  $J = 15.6$  Hz, 1H), 6.18 (s, 1H), 5.93 (dd,  $J = 16.0, 9.2$  Hz, 1H), 5.58 (d,  $J = 1.2$  Hz, 1H), 4.88 (dd,  $J = 11.2, 8.8$  Hz, 1H), 4.67 (d,  $J = 11.2$  Hz, 1H), 4.14-4.04 (m, 2H), 1.17 (t,  $J = 7.2$  Hz, 3H);  $^{13}C$  NMR (100 MHz,  $CDCl_3$ ):  $\delta$  199.0, 166.2, 142.3, 136.9, 136.5, 135.7 (d,  $J = 3.0$  Hz), 134.8, 133.4, 130.5, 130.4, 128.8, 128.5, 128.4, 127.8, 126.4, 126.2, 123.9, 115.1 (d,  $J = 21.0$  Hz), 60.9, 54.3, 48.6, 14.0;  $^{19}F$  NMR (376 MHz,  $CDCl_3$ ): -116.1; HRMS (ESI):  $m/z$  calcd for  $C_{28}H_{25}FO_3Na$   $[M+Na]^+$  451.1685, found 451.1678.

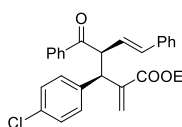

[Reaction time: 24 h]; **5j**: 150 mg, 67%, a yellow solid,  $>20:1$  dr, 57.7.2-60.5°C; IR (thin film):  $\nu_{max}$  3431, 2926, 1490, 1711, 1255, 1146, 959, 751, 689  $cm^{-1}$ ;  $^1H$  NMR (400 MHz,  $CDCl_3$ ):  $\delta$  8.04 (dt,  $J = 7.2, 1.2$  Hz, 2H), 7.59-7.55 (m, 1H), 7.50-7.45 (m, 2H), 7.22 (s, 4H), 7.21-7.16 (m, 2H), 7.14-7.09 (m, 2H), 6.29 (d,  $J = 16.0$  Hz, 1H), 6.18 (s, 1H), 5.93 (dd,  $J = 16.0, 8.8$  Hz, 1H), 5.59 (d,  $J = 1.2$  Hz, 1H), 4.89 (dd,  $J = 11.2, 8.8$  Hz, 1H), 4.66 (dd,  $J = 11.2, 1.2$  Hz, 1H), 4.14-4.04 (m, 2H), 1.18 (t,  $J = 7.2$  Hz, 3H);  $^{13}C$  NMR (100 MHz,  $CDCl_3$ ):  $\delta$  198.8, 166.1, 142.1, 138.6, 136.8, 136.4, 134.9, 133.4, 132.6, 130.4, 128.8, 128.5, 128.4, 127.8, 126.3, 126.2, 124.1, 61.0, 54.0, 48.7, 29.7, 14.0; HRMS (ESI):  $m/z$  calcd for  $C_{28}H_{25}ClO_3Na$   $[M+Na]^+$  467.1390, found 467.1373.

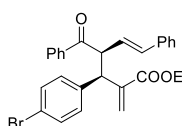

[Reaction time: 24 h]; **5k**: 125 mg, 51%, a yellow solid,  $>20:1$  dr, 61.8.2-63.7°C; IR (thin film):  $\nu_{max}$  3451, 2926, 1712, 1488, 1255, 970, 751, 690  $cm^{-1}$ ;  $^1H$  NMR (400 MHz,  $CDCl_3$ ):  $\delta$  8.04 (dt,  $J = 6.8, 1.2$  Hz, 2H), 7.59-7.55 (m, 1H), 7.50-7.45 (m, 2H), 7.38 (td,  $J = 4.4, 2.6$  Hz, 2H), 7.24-7.20 (m, 1H), 7.20-7.14 (m, 4H), 7.22 (dt,  $J = 6.6, 1.4$  Hz, 2H), 6.30 (d,  $J = 16.0$  Hz, 1H), 6.18 (s, 1H), 5.93 (dd,  $J = 16.0, 8.8$  Hz, 1H), 5.59 (d,  $J = 1.2$  Hz, 1H), 4.89 (dd,  $J = 10.8, 8.8$  Hz, 1H), 4.65 (d,  $J = 11.2$  Hz, 1H), 4.13-4.04 (m, 2H), 1.18 (t,  $J = 7.2$  Hz, 3H);  $^{13}C$  NMR (100 MHz,  $CDCl_3$ ):  $\delta$  198.8, 166.1, 142.0, 139.2, 136.8, 136.4, 134.9, 133.4, 131.4, 130.8, 128.8, 128.5, 128.4, 127.8, 126.3, 126.2, 124.2, 120.8, 61.0, 54.0, 48.8, 14.0; HRMS (ESI):  $m/z$  calcd for  $C_{28}H_{25}BrO_3Na$   $[M+Na]^+$  511.0885, found 511.0873.

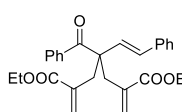

[Reaction time: 2 h]; **4a**: 145 mg, 65%, a yellow oil; IR (thin film):  $\nu_{max}$  2982, 1713, 1629, 1447, 1260, 1153, 950, 743, 695  $cm^{-1}$ ;  $^1H$  NMR (400 MHz,  $CDCl_3$ ):  $\delta$  7.91 (dt,  $J = 7.2, 1.2$  Hz, 2H), 7.47-7.43 (m, 1H), 7.37-7.32 (m, 2H), 7.28-7.26 (m, 4H), 7.24-7.19 (m, 1H), 6.42 (d,  $J = 16.8$  Hz, 2H), 6.34 (d,  $J = 16.8$  Hz, 2H), 6.20 (d,  $J = 1.2$  Hz, 2H), 5.57 (d,  $J = 1.2$  Hz, 2H), 3.95-3.84 (m, 4H), 3.24 (dd,  $J = 14.4, 0.8$  Hz, 2H), 3.00 (dd,  $J = 14.4, 1.2$  Hz, 2H), 1.06 (t,  $J = 7.2$  Hz, 6H);  $^{13}C$  NMR (100 MHz,  $CDCl_3$ ):  $\delta$  202.5, 167.6, 137.2, 137.1, 136.7, 132.0, 131.6, 130.6, 129.6, 128.5, 128.2, 128.1, 127.7, 126.3, 60.8, 56.5, 37.2, 14.0; HRMS (ESI):  $m/z$  calcd for  $C_{28}H_{30}O_5K$   $[M+H]^+$  485.1730, found 485.1767.

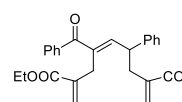

**6a**: 45 mg, 20%, a yellow oil; IR (thin film):  $\nu_{max}$  2930, 1715, 1651, 1449, 1273, 1100, 1028, 955, 700  $cm^{-1}$ ;  $^1H$  NMR (400 MHz,  $CDCl_3$ ):  $\delta$  7.63 (dt,  $J = 7.2, 1.2$  Hz, 2H), 7.55-7.50 (m, 1H), 7.43-7.39 (m, 2H), 7.29 (td,  $J = 7.2, 1.6$  Hz, 2H), 7.23-7.19 (m, 1H), 7.16 (d,  $J = 1.4$  Hz, 2H), 6.50 (d,  $J = 10.0$  Hz, 1H), 6.15 (dd,  $J = 17.6, 1.2$  Hz, 2H), 5.42 (d,  $J = 1.2$  Hz, 2H), 4.25-4.09 (m, 5H), 3.51 (s, 2H), 2.77 (dd,  $J = 14.0, 6.8$  Hz, 1H), 2.64 (dd,  $J = 14.0, 8.8$  Hz, 1H), 1.27 (t,  $J = 7.2$  Hz, 3H), 1.25 (t,  $J = 7.2$  Hz, 3H);  $^{13}C$  NMR (100 MHz,  $CDCl_3$ ):  $\delta$  197.5, 166.7, 166.7, 148.6, 142.2, 138.1, 137.9, 137.8, 131.9, 129.6, 128.8, 128.2, 127.5, 127.3, 126.9, 125.5, 60.9, 60.8, 44.2, 39.6, 29.7, 28.9, 14.2, 14.2; HRMS (ESI):  $m/z$  calcd for  $C_{28}H_{30}O_5Na$   $[M+Na]^+$  469.1991, found 469.20862.

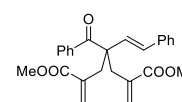

[Reaction time: 2 h]; **4b**: 143 mg, 68%, a yellow oil; IR (thin film):  $\nu_{max}$  2952, 1722, 1676, 1631, 1442, 1157, 951, 735, 695  $cm^{-1}$ ;  $^1H$  NMR (400 MHz,  $CDCl_3$ ):  $\delta$  7.91 (dt,  $J = 7.2, 1.2$  Hz, 2H), 7.47-7.43 (m, 1H), 7.37-7.33 (m, 2H), 7.30-7.28 (m, 4H), 7.24-7.20 (m, 1H), 6.36 (dd,  $J = 27.4, 16.4$  Hz, 2H), 6.20 (d,  $J = 1.2$  Hz, 2H), 5.58 (d,  $J = 1.2$  Hz, 2H), 3.43 (s, 6H), 3.23 (dd,  $J = 14.4, 1.2$  Hz, 2H), 3.01 (dd,  $J = 14.4, 1.2$  Hz, 2H);  $^{13}C$  NMR (100 MHz,  $CDCl_3$ ):  $\delta$  202.4, 168.0, 137.2, 136.8, 136.6, 132.0, 131.7, 130.6, 129.6, 128.6, 128.5, 128.1, 127.8, 126.3, 56.4, 51.8, 37.3; HRMS (ESI):  $m/z$  calcd for  $C_{26}H_{26}O_5Na$   $[M+Na]^+$  441.1678, found 441.1667.

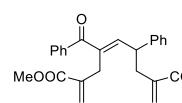

**6b**: 31 mg, 15%, a yellow oil; IR (thin film):  $\nu_{max}$  2825, 1719, 1652, 1440, 1276, 1150, 959, 759, 700  $cm^{-1}$ ;  $^1H$  NMR (400 MHz,  $CDCl_3$ ):  $\delta$  7.67 (d,  $J = 7.6$  Hz, 2H), 7.57 (t,  $J = 7.6$  Hz, 1H), 7.46 (t,  $J = 7.6$  Hz, 2H), 7.36-7.27 (m, 3H), 7.20 (d,  $J = 7.6$  Hz, 2H), 6.54 (d,  $J = 10.0$  Hz, 1H), 6.20 (d,  $J = 12.0$  Hz, 2H), 5.48 (d,  $J = 6.8$  Hz, 2H), 4.16 (d,  $J = 8.4$  Hz, 1H), 3.80 (d,  $J = 2.0$  Hz, 3H), 3.75 (d,  $J = 2.4$  Hz, 3H), 3.56 (s, 2H), 2.82 (dd,  $J = 14.0, 6.8$  Hz, 1H), 2.69 (dd,  $J = 13.8, 8.6$  Hz, 1H);  $^{13}C$  NMR (100 MHz,  $CDCl_3$ ):  $\delta$  197.5, 167.2, 167.1, 148.4, 142.2, 138.1, 137.8, 137.7, 137.5, 132.0, 129.6, 128.8, 128.2, 127.6, 127.5, 126.9, 125.9, 52.0, 51.9, 44.2, 39.6, 29.7; HRMS (ESI):  $m/z$  calcd for  $C_{26}H_{26}O_5Na$   $[M+Na]^+$  441.1678, found 441.1665.

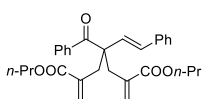

[Reaction time: 2 h]; **4c**: 131 mg, 55%, a yellow oil; IR (thin film):  $\nu_{\max}$  2969, 1715, 1677, 1447, 1260, 1164, 949, 755, 694  $\text{cm}^{-1}$ ;  $^1\text{H NMR}$  (400 MHz,  $\text{CDCl}_3$ ):  $\delta$  7.91 (dt,  $J = 7.2, 1.2$  Hz, 2H), 7.47-7.43 (m, 1H), 7.36-7.32 (m, 2H), 7.29-7.27 (m, 4H), 7.24-7.19 (m, 1H), 6.38 (d,  $J = 16.7$  Hz, 2H), 6.20 (d,  $J = 1.2$  Hz, 2H), 5.56 (d,  $J = 1.6$  Hz, 2H), 3.85-3.74 (m, 4H), 3.25 (dd,  $J = 14.4, 1.2$  Hz, 2H), 3.00 (dd,  $J = 14.4, 1.2$  Hz, 2H), 1.47 (td,  $J = 7.2, 7.2$  Hz, 4H), 0.81 (t,  $J = 7.4$  Hz, 6H);  $^{13}\text{C NMR}$  (100 MHz,  $\text{CDCl}_3$ ):  $\delta$  202.5, 167.7, 137.2, 137.1, 136.7, 132.0, 131.6, 130.6, 129.6, 128.5, 128.2, 128.1, 127.7, 126.3, 66.4, 56.5, 37.1, 21.7, 10.3; HRMS (ESI):  $m/z$  calcd for  $\text{C}_{30}\text{H}_{24}\text{O}_5\text{Na}$  [ $\text{M}+\text{Na}$ ] $^+$  497.2304, found 497.2299.

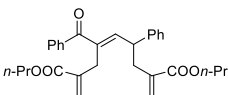

**6c**: 41 mg, 17%, a yellow oil; IR (thin film):  $\nu_{\max}$  2968, 1711, 1651, 1449, 1273, 958, 758, 697, 655  $\text{cm}^{-1}$ ;  $^1\text{H NMR}$  (400 MHz,  $\text{CDCl}_3$ ):  $\delta$  7.63 (dt,  $J = 6.8, 1.2$  Hz, 2H), 7.55-7.50 (m, 1H), 7.44-7.39 (m, 2H), 7.31-7.27 (m, 2H), 7.23-7.19 (m, 1H), 6.54 (dt,  $J = 6.8, 1.4$  Hz, 2H), 6.51 (d,  $J = 10.4$  Hz, 1H), 6.18 (d,  $J = 1.6$  Hz, 1H), 6.12 (d,  $J = 1.2$  Hz, 1H),

5.42 (dd,  $J = 10.0, 1.2$  Hz, 2H), 4.15-4.05 (m, 5H), 3.51 (d,  $J = 1.6$  Hz, 2H), 2.78 (ddd,  $J = 14.0, 6.8, 1.2$  Hz, 1H), 2.65 (ddd,  $J = 14.0, 8.8, 1.2$  Hz, 1H), 1.75-1.60 (m, 4H), 0.95 (dt,  $J = 13.6, 7.2$  Hz, 6H);  $^{13}\text{C NMR}$  (100 MHz,  $\text{CDCl}_3$ ):  $\delta$  197.5, 166.7, 148.7, 142.3, 138.1, 138.0, 137.8, 137.8, 131.9, 129.6, 128.8, 128.2, 127.5, 127.3, 126.9, 125.4, 44.3, 39.6, 29.7, 28.9, 22.0, 22.0, 10.5, 10.5; HRMS (ESI):  $m/z$  calcd for  $\text{C}_{30}\text{H}_{34}\text{O}_5\text{Na}$  [ $\text{M}+\text{Na}$ ] $^+$  497.2304, found 497.2298.

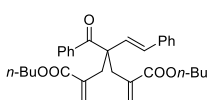

[Reaction time: 2 h]; **4d**: 144 mg, 57%, a yellow oil; IR (thin film):  $\nu_{\max}$  2961, 1716, 1677, 1629, 1449, 1260, 1162, 949, 695  $\text{cm}^{-1}$ ;  $^1\text{H NMR}$  (400 MHz,  $\text{CDCl}_3$ ):  $\delta$  7.91 (dt,  $J = 7.2, 1.2$  Hz, 2H), 7.47-7.43 (m, 1H), 7.34-7.32 (m, 2H), 7.29-7.27 (m, 4H), 7.23-7.19 (m, 1H), 6.38 (q,  $J = 16.8$  Hz, 2H), 6.19 (d,  $J = 1.2$  Hz, 2H), 5.56 (d,  $J = 1.2$  Hz, 2H), 3.90-3.78 (m,

4H), 3.24 (dd,  $J = 14.4, 0.8$  Hz, 2H), 3.00 (dd,  $J = 14.0, 0.8$  Hz, 2H), 1.46-1.38 (m, 4H), 1.28-1.21 (m, 4H), 0.84 (t,  $J = 7.4$  Hz, 6H);  $^{13}\text{C NMR}$  (100 MHz,  $\text{CDCl}_3$ ):  $\delta$  202.5, 167.7, 137.2, 137.1, 136.7, 132.0, 131.6, 130.6, 129.6, 128.5, 128.2, 128.0, 127.7, 126.3, 64.7, 56.5, 37.2, 30.4, 19.1, 13.7; HRMS (ESI):  $m/z$  calcd for  $\text{C}_{32}\text{H}_{38}\text{O}_5\text{Na}$  [ $\text{M}+\text{Na}$ ] $^+$  525.2617, found 525.2607.

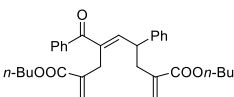

**6d**: 39 mg, 16%, a yellow oil; IR (thin film):  $\nu_{\max}$  2961, 1715, 1653, 1451, 1275, 1154, 959, 699  $\text{cm}^{-1}$ ;  $^1\text{H NMR}$  (400 MHz,  $\text{CDCl}_3$ ):  $\delta$  7.65 (dt,  $J = 6.8, 1.6$  Hz, 2H), 7.57-7.53 (m, 1H), 7.43 (t,  $J = 7.6$  Hz, 2H), 7.31 (dd,  $J = 8.2, 6.6$  Hz, 2H), 7.26-7.22 (m, 1H), 7.19-7.17 (m, 2H), 6.53 (d,  $J = 10.0$  Hz, 1H), 6.19 (d,  $J = 1.6$  Hz, 1H), 6.13 (d,  $J = 1.2$  Hz, 1H),

5.45 (d,  $J = 1.2$  Hz, 1H), 5.43 (d,  $J = 1.6$  Hz, 1H), 4.21-4.11 (m, 5H), 3.53 (s, 2H), 2.80 (dd,  $J = 14.0, 6.4$  Hz, 1H), 2.66 (dd,  $J = 13.8, 8.6$  Hz, 1H), 1.74-1.64 (m, 3H), 1.41 (td,  $J = 14.8, 7.6$  Hz, 5H), 0.96 (dt,  $J = 14.2, 7.2$  Hz, 6H);  $^{13}\text{C NMR}$  (100 MHz,  $\text{CDCl}_3$ ):  $\delta$  197.5, 166.7, 148.6, 142.3, 138.1, 138.0, 137.8, 137.8, 131.9, 129.6, 128.8, 128.2, 127.5, 127.2, 126.8, 125.4, 64.8, 64.7, 44.2, 39.6, 30.7, 30.6, 28.9, 19.3, 19.2, 13.7; HRMS (ESI):  $m/z$  calcd for  $\text{C}_{32}\text{H}_{38}\text{O}_5\text{Na}$  [ $\text{M}+\text{Na}$ ] $^+$  525.2617, found 525.2602.

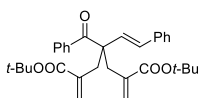

[Reaction time: 2 h]; **4e**: 152 mg, 61%, a yellow oil; IR (thin film):  $\nu_{\max}$  2978, 1710, 1677, 1368, 1254, 1147, 948, 850, 694  $\text{cm}^{-1}$ ;  $^1\text{H NMR}$  (400 MHz,  $\text{CDCl}_3$ ):  $\delta$  7.90 (dt,  $J = 7.2, 1.2$  Hz, 2H), 7.46-7.42 (m, 1H), 7.36-7.32 (m, 2H), 7.30-7.26 (m, 3H), 7.24-7.17 (m, 2H), 6.43 (dd,  $J = 30.8, 16.8$  Hz, 2H), 6.14 (d,  $J = 1.6$  Hz, 2H), 5.50 (d,  $J = 1.6$  Hz, 2H), 3.20 (d,  $J =$

14.4 Hz, 2H), 2.95 (d,  $J = 14.0$  Hz, 2H), 1.28 (s, 18H);  $^{13}\text{C NMR}$  (100 MHz,  $\text{CDCl}_3$ ):  $\delta$  202.8, 166.7, 138.3, 137.5, 137.0, 131.9, 131.7, 130.4, 129.6, 128.5, 128.0, 127.6, 126.4, 80.7, 56.6, 37.0, 27.9, 27.8; HRMS (ESI):  $m/z$  calcd for  $\text{C}_{32}\text{H}_{38}\text{O}_5\text{Na}$  [ $\text{M}+\text{Na}$ ] $^+$  525.2617, found 525.2602.

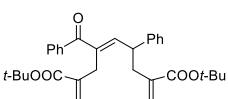

**6e**: 41 mg, 16%, a yellow oil; IR (thin film):  $\nu_{\max}$  2928, 1710, 1654, 1368, 1278, 1147, 960, 850, 699  $\text{cm}^{-1}$ ;  $^1\text{H NMR}$  (400 MHz,  $\text{CDCl}_3$ ):  $\delta$  7.64 (dt,  $J = 7.2, 1.2$  Hz, 2H), 7.54-7.50 (m, 1H), 7.43-7.38 (m, 2H), 7.37-7.26 (m, 2H), 7.23-7.18 (m, 1H), 7.16 (dt,  $J = 6.8, 1.4$  Hz, 2H), 6.50 (d,  $J = 10.0$  Hz, 1H), 6.09 (dd,  $J = 4.6, 1.4$  Hz, 1H), 6.02 (d,  $J = 1.2$  Hz, 1H), 5.38 (d,  $J = 1.2$  Hz,

1H), 5.33 (d,  $J = 1.6$  Hz, 1H), 4.08 (td,  $J = 9.2, 6.0$  Hz, 1H), 3.47 (d,  $J = 5.2$  Hz, 2H), 2.74 (ddd,  $J = 13.6, 6.4, 1.2$  Hz, 1H), 2.59 (dd,  $J = 13.8, 8.6$  Hz, 1H), 1.48 (s, 9H), 1.45 (s, 9H);  $^{13}\text{C NMR}$  (100 MHz,  $\text{CDCl}_3$ ):  $\delta$  197.6, 165.9, 165.9, 148.9, 142.5, 139.3, 139.1, 138.2, 137.8, 131.9, 129.7, 128.8, 128.1, 127.5, 126.8, 126.6, 124.4, 44.4, 39.6, 28.1, 28.0; HRMS (ESI):  $m/z$  calcd for  $\text{C}_{32}\text{H}_{38}\text{O}_5\text{Na}$  [ $\text{M}+\text{Na}$ ] $^+$  525.2617, found 525.2605.

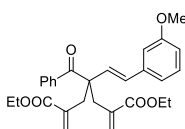

[Reaction time: 2 h]; **4f**: 77 mg, 33%, a yellow oil; IR (thin film):  $\nu_{\max}$  2926, 1715, 1598, 1447, 1268, 1157, 949, 783, 691  $\text{cm}^{-1}$ ;  $^1\text{H NMR}$  (400 MHz,  $\text{CDCl}_3$ ):  $\delta$  7.93 (dt,  $J = 7.2, 1.2$  Hz, 2H), 7.50-7.45 (m, 1H), 7.40-7.35 (m, 2H), 7.22 (t,  $J = 7.8$  Hz, 1H), 6.90 (d,  $J = 7.6$  Hz, 1H), 6.83-6.78 (m, 2H), 6.43 (dd,  $J = 36.2, 16.6$  Hz, 2H), 6.23 (d,  $J = 1.6$  Hz, 2H), 5.59 (d,  $J = 1.6$  Hz, 2H), 4.00-3.86 (m, 4H), 3.81 (s, 3H), 3.25 (d,  $J = 14.4$  Hz, 2H), 3.02 (d,  $J = 14.4$

Hz, 2H), 1.10 (t,  $J = 7.2$  Hz, 6H);  $^{13}\text{C NMR}$  (100 MHz,  $\text{CDCl}_3$ ):  $\delta$  202.4, 167.6, 159.8, 138.2, 137.2, 137.1, 132.0, 132.0, 130.5, 129.6, 129.5, 128.2, 128.1, 118.9, 113.4, 111.6, 60.8, 56.4, 55.2, 37.2, 14.0; HRMS (ESI):  $m/z$  calcd for  $\text{C}_{29}\text{H}_{32}\text{O}_6\text{Na}$  [ $\text{M}+\text{Na}$ ] $^+$  499.2097, found 499.2084.

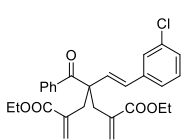

[Reaction time: 2 h]; **4h**: 137 mg, 57%, a yellow oil; IR (thin film):  $\nu_{\max}$  2982, 1713, 1629, 1445, 12612, 1153, 949, 782, 691  $\text{cm}^{-1}$ ;  $^1\text{H}$  NMR (400 MHz,  $\text{CDCl}_3$ ):  $\delta$  7.89 (dt,  $J = 7.2, 1.2$  Hz, 2H), 7.48-7.44 (m, 1H), 7.38-7.34 (m, 2H), 7.24 (d,  $J = 2.0$  Hz, 1H), 7.21-7.17 (m, 2H), 7.15-7.11 (m, 1H), 6.43 (d,  $J = 16.4$  Hz, 1H), 6.27 (d,  $J = 16.4$  Hz, 1H), 6.22 (d,  $J = 1.6$  Hz, 2H), 5.58 (d,  $J = 1.2$  Hz, 2H), 3.99-3.86 (m, 4H), 3.23 (dd,  $J = 14.4, 0.8$  Hz, 2H), 2.99 (dd,  $J = 14.4, 1.2$  Hz, 2H), 1.09 (t,  $J = 7.2$  Hz, 6H);  $^{13}\text{C}$  NMR (100 MHz,  $\text{CDCl}_3$ ):  $\delta$  202.1, 167.5, 138.6, 137.1, 136.9, 134.5, 133.3, 132.1, 129.8, 129.6, 129.3, 128.5, 128.1, 127.6, 126.2, 124.4, 60.9, 56.6, 37.3, 14.0; HRMS (ESI):  $m/z$  calcd for  $\text{C}_{28}\text{H}_{29}\text{ClO}_5\text{Na}$  [ $\text{M}+\text{Na}$ ] $^+$  503.1601, found 503.1587.

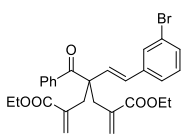

[Reaction time: 2 h]; **4i**: 145 mg, 55%, a yellow oil; IR (thin film):  $\nu_{\max}$  2982, 1715, 1677, 1445, 1277, 1154, 950, 781, 695  $\text{cm}^{-1}$ ;  $^1\text{H}$  NMR (400 MHz,  $\text{CDCl}_3$ ):  $\delta$  7.89 (dt,  $J = 7.2, 1.2$  Hz, 2H), 7.49-7.44 (m, 1H), 7.40-7.33 (m, 4H), 7.19-7.12 (m, 2H), 6.42 (d,  $J = 16.4$  Hz, 1H), 6.25 (d,  $J = 16.8$  Hz, 1H), 6.22 (d,  $J = 1.6$  Hz, 2H), 5.58 (d,  $J = 1.2$  Hz, 2H), 3.99-3.86 (m, 4H), 3.23 (dd,  $J = 14.4, 1.2$  Hz, 2H), 2.99 (dd,  $J = 14.4, 1.2$  Hz, 2H), 1.09 (t,  $J = 7.2$  Hz, 6H);  $^{13}\text{C}$  NMR (100 MHz,  $\text{CDCl}_3$ ):  $\delta$  202.0, 167.5, 138.9, 137.0, 136.9, 133.3, 132.1, 130.5, 130.1, 129.6, 129.2, 129.1, 128.5, 128.1, 124.9, 122.8, 60.9, 56.6, 37.3, 14.0; HRMS (ESI):  $m/z$  calcd for  $\text{C}_{28}\text{H}_{29}\text{BrO}_5\text{Na}$  [ $\text{M}+\text{Na}$ ] $^+$  547.1096, found 547.1081.

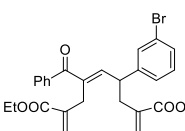

**6i**: 71 mg, 27%, a yellow oil; IR (thin film):  $\nu_{\max}$  2926, 1714, 1654, 1472, 1153, 1027, 957, 816, 697  $\text{cm}^{-1}$ ;  $^1\text{H}$  NMR (400 MHz,  $\text{CDCl}_3$ ):  $\delta$  7.64 (dt,  $J = 6.8, 1.2$  Hz, 2H), 7.56-7.51 (m, 1H), 7.45-7.40 (m, 2H), 7.37-7.32 (m, 2H), 7.16 (t,  $J = 7.6$  Hz, 1H), 7.11-7.07 (m, 1H), 6.40 (d,  $J = 10.0$  Hz, 1H), 6.19 (d,  $J = 1.2$  Hz, 1H), 6.13 (d,  $J = 1.2$  Hz, 1H), 5.45 (d,  $J = 1.4$  Hz, 2H), 4.24-4.14 (m, 5H), 3.50 (s, 2H), 2.76 (ddd,  $J = 14.0, 6.4, 1.2$  Hz, 1H), 2.61 (dd,  $J = 14.0, 9.2$  Hz, 1H), 1.31 (td,  $J = 7.2, 1.6$  Hz, 6H);  $^{13}\text{C}$  NMR (100 MHz,  $\text{CDCl}_3$ ):  $\delta$  197.4, 166.6, 144.7, 138.5, 138.0, 137.7, 137.6, 132.1, 130.6, 130.3, 129.7, 129.3, 128.6, 128.2, 127.5, 126.3, 125.8, 125.6, 61.0, 60.9, 43.8, 39.5, 29.7, 14.2, 14.2; HRMS (ESI):  $m/z$  calcd for  $\text{C}_{28}\text{H}_{29}\text{BrO}_5\text{Na}$  [ $\text{M}+\text{Na}$ ] $^+$  547.1096, found 547.1078.

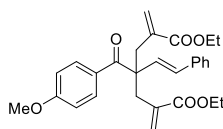

[Reaction time: 24 h]; **4k/6k**: 113 mg, 48%, a yellow oil mixture, 10:1 *rr*; IR (thin film):  $\nu_{\max}$  2981, 1713, 1599, 1446, 1258, 1169, 948, 754, 694  $\text{cm}^{-1}$ ;  $^1\text{H}$  NMR (400 MHz,  $\text{CDCl}_3$ ): **4k**:  $\delta$  7.97 (dt,  $J = 8.8, 3.2$  Hz, 2H), 7.27 (t,  $J = 4.4$  Hz, 4H), 7.24-7.19 (m, 1H), 6.83 (dt,  $J = 9.2, 2.8$  Hz, 2H), 6.43 (d,  $J = 16.8$  Hz, 1H), 6.33 (d,  $J = 16.8$  Hz, 1H), 6.19 (d,  $J = 1.2$  Hz, 2H), 5.57 (d,  $J = 1.6$  Hz, 2H), 3.94-3.85 (m, 4H), 3.82 (s, 3H), 3.23 (dd,  $J = 14.4, 1.2$  Hz, 2H), 2.98 (dd,  $J = 14.4, 1.2$  Hz, 2H), 1.07 (t,  $J = 7.2$  Hz, 6H);  $^{13}\text{C}$  NMR (100 MHz,  $\text{CDCl}_3$ ): **4k**:  $\delta$  200.3, 167.7, 162.6, 137.3, 136.8, 132.2, 132.1, 130.3, 129.6, 128.5, 128.2, 127.7, 126.3, 113.2, 60.8, 56.3, 55.4, 37.2, 14.0; HRMS (ESI):  $m/z$  calcd for  $\text{C}_{29}\text{H}_{32}\text{O}_6\text{Na}$  [ $\text{M}+\text{Na}$ ] $^+$  499.2097, found 499.2082.

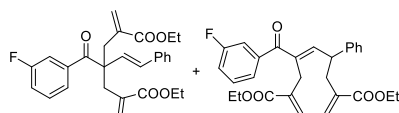

[Reaction time: 24 h]; **4l/6l**: 78 mg, 34%, a yellow oil mixture, 2:1 *rr*; IR (thin film):  $\nu_{\max}$  2983, 1714, 1680, 1586, 1439, 1150, 964, 754, 696  $\text{cm}^{-1}$ ;  $^1\text{H}$  NMR (400 MHz,  $\text{CDCl}_3$ ):  $\delta$  **4l**: 7.72 (ddd,  $J = 8.0, 1.6, 1.0$  Hz, 1H), 7.60 (ddd,  $J = 10.0, 2.4, 1.6$  Hz, 1H), 7.35-7.31 (m, 1H), 7.31-7.27 (m, 4H), 7.25-7.19 (m, 2H), 6.35 (d,  $J = 2.4$  Hz, 2H), 6.21 (d,  $J = 1.2$  Hz, 2H), 5.58 (q,  $J = 1.2$  Hz, 2H), 4.02-3.82 (m, 4H), 3.22 (dd,  $J = 14.2, 1.0$  Hz, 2H), 3.00 (dd,  $J = 14.2, 1.0$  Hz, 2H), 1.08 (t,  $J = 7.2$  Hz, 6H); **6l**: 7.18-7.14 (m, 1H), 5.43 (dd,  $J = 12.0, 1.2$  Hz, 1H), 4.26-4.10 (m, 2H), 3.50 (s, 1H), 1.27 (dt,  $J = 26.8, 7.2$  Hz, 3H);  $^{13}\text{C}$  NMR (100 MHz,  $\text{CDCl}_3$ ):  $\delta$  **4l/6l**: 201.1, 196.0, 167.5, 166.6 (d,  $J = 4.0$  Hz), 163.5, 161.0, 149.0, 142.1, 140.2 (d,  $J = 6.0$  Hz), 139.1 (d,  $J = 6.0$  Hz), 137.9, 137.7 (d,  $J = 5.0$  Hz), 137.0, 136.5, 131.1, 130.0, 129.8 (d,  $J = 8.0$  Hz), 129.6 (d,  $J = 8.0$  Hz), 128.8, 128.6, 128.4, 127.9, 127.5, 127.4, 126.9, 126.3, 125.6, 125.4 (d,  $J = 3.0$  Hz), 125.3 (d,  $J = 3.0$  Hz), 119.1 (d,  $J = 21.0$  Hz), 119.0 (d,  $J = 22.0$  Hz), 116.5 (d,  $J = 23.0$  Hz), 116.4 (d,  $J = 22.0$  Hz), 60.9, 56.5, 44.2, 39.6, 37.2, 29.7, 28.9, 14.2 (d,  $J = 3.6$  Hz), 13.9;  $^{19}\text{F}$  NMR (376 MHz,  $\text{CDCl}_3$ ):  $\delta$  **4l/6l**: -111.9, -112.2; HRMS (ESI):  $m/z$  calcd for  $\text{C}_{28}\text{H}_{29}\text{FO}_5\text{Na}$  [ $\text{M}+\text{Na}$ ] $^+$  487.1897, found 487.1882.

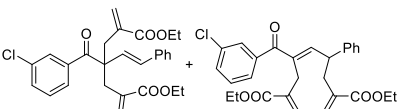

[Reaction time: 6 h]; **4m/6m**: 160 mg, 67%, a yellow oil mixture, 2:1 *rr*; IR (thin film):  $\nu_{\max}$  2983, 1714, 1680, 1445, 1260, 955, 815, 749, 698  $\text{cm}^{-1}$ ;  $^1\text{H}$  NMR (400 MHz,  $\text{CDCl}_3$ ):  $\delta$  **4m**: 7.87 (t,  $J = 2.0$  Hz, 1H), 7.81 (ddd,  $J = 8.0, 1.6, 1.2$  Hz, 1H), 7.50 (dd,  $J = 8.0, 2.0$  Hz, 1H), 7.42 (ddd,  $J = 8.0, 2.4, 1.2$  Hz, 1H), 7.33-7.26 (m, 5H), 6.34 (d,  $J = 2.4$  Hz, 2H), 6.22 (d,  $J = 1.6$  Hz, 2H), 5.58 (d,  $J = 1.2$  Hz, 2H), 3.99-3.83 (m, 4H), 3.21 (dd,  $J = 14.2, 1.0$  Hz, 2H), 2.99 (dd,  $J = 14.2, 1.0$  Hz, 2H), 1.08 (t,  $J = 7.2$  Hz, 6H); **6m**: 7.26-7.18 (m, 2H), 7.18-7.14 (m, 1H), 5.58 (dd,  $J = 24.0, 1.2$  Hz, 2H), 5.49-5.38 (m, 1H), 4.27-4.13 (m, 2H), 3.49 (s, 1H), 1.27 (dt,  $J = 14.2, 7.2$  Hz, 3H);  $^{13}\text{C}$  NMR (100 MHz,  $\text{CDCl}_3$ ):  $\delta$  **4m/6m**: 201.1, 196.6, 167.5, 166.6, 149.2, 142.1, 139.8, 138.7, 137.9, 137.7, 137.2, 137.0, 136.5, 134.4, 133.6, 131.9, 131.2, 131.1 (2C), 129.7, 129.5, 129.2, 128.8, 128.7, 128.6, 128.5, 128.4, 128.1, 128.0, 127.9, 127.8, 127.7, 127.5, 127.4, 126.9, 126.3, 125.6, 125.4, 60.9, 60.9, 56.5, 44.1, 39.7, 38.2, 37.3, 29.7, 28.9, 14.2 (d,  $J = 5.0$  Hz), 13.9; HRMS (ESI):  $m/z$  calcd for  $\text{C}_{28}\text{H}_{29}\text{ClO}_5\text{Na}$  [ $\text{M}+\text{Na}$ ] $^+$  503.1601, found 503.1589.

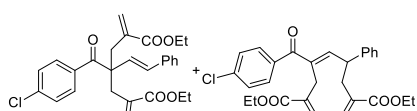

[Reaction time: 6 h]; **4n/6n**: 170 mg, 69%, a yellow oil mixture, 1.5:1 *rr*; IR (thin film):  $\nu_{\max}$  2983, 1714, 1630, 1588, 1446, 1264, 949, 752, 697  $\text{cm}^{-1}$ ;  $^1\text{H NMR}$  (400 MHz,  $\text{CDCl}_3$ ):  $\delta$  **4n**: 7.88 (dt,  $J = 8.8, 2.4$  Hz, 2H), 7.58 (dt,  $J = 8.8, 2.2$  Hz, 1H), 7.39 (dt,  $J = 8.4, 2.6$  Hz, 1H), 7.30-7.26 (m, 4H), 7.25-7.20 (m, 2H), 6.34 (d,  $J = 9.2$  Hz, 2H), 6.21 (d,  $J = 1.2$  Hz, 2H), 5.58 (d,  $J = 1.2$  Hz, 2H), 3.97-3.83 (m, 4H), 3.21 (dd,  $J = 14.4, 0.8$  Hz, 2H), 2.98 (dd,  $J = 14.2, 1.2$  Hz, 2H), 1.07 (t,  $J = 7.2$  Hz, 6H); **6n**: 7.34-7.31 (m, 2H), 7.18-7.12 (m, 1H), 5.42 (q,  $J = 1.2$  Hz, 1H), 4.23-4.12 (m, 2H), 3.50 (s, 1H), 1.27 (dt,  $J = 24.0, 7.2$  Hz, 3H);  $^{13}\text{C NMR}$  (100 MHz,  $\text{CDCl}_3$ ):  $\delta$  **4n/6n**: 201.1, 196.2, 167.5, 166.6 (d,  $J = 4.0$  Hz), 148.5, 142.1, 138.4, 138.3, 137.9, 137.7, 137.6, 137.0, 136.5, 136.4, 135.3, 132.0, 131.3, 131.2, 131.0, 130.9, 130.6, 128.8, 128.6, 128.5, 128.4, 128.3, 127.9, 127.5, 127.3, 126.9, 126.3, 125.6, 60.9, 60.8, 56.4, 44.2, 39.5, 38.2, 37.3, 29.7, 29.0, 14.2 (d,  $J = 6.0$  Hz), 13.9; HRMS (ESI):  $m/z$  calcd for  $\text{C}_{28}\text{H}_{29}\text{O}_5\text{Na}$  [ $\text{M}+\text{Na}$ ] $^+$  503.1601, found 503.1584.

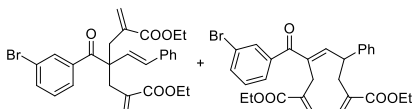

[Reaction time: 6 h]; **4o/6o**: 164 mg, 62%, a yellow oil mixture, 1.5:1 *rr*; IR (thin film):  $\nu_{\max}$  2983, 1714, 1679, 1445, 1260, 1153, 953, 746, 695  $\text{cm}^{-1}$ ;  $^1\text{H NMR}$  (400 MHz,  $\text{CDCl}_3$ ):  $\delta$  **4o**: 8.03 (t,  $J = 1.6$  Hz, 1H), 7.86 (dt,  $J = 8.4, 1.2$  Hz, 1H), 7.60-7.55 (m, 1H), 7.33-7.26 (m, 4H), 7.26-7.20 (m, 2H), 6.34 (d,  $J = 1.6$  Hz, 2H), 6.22 (d,  $J = 1.2$  Hz, 2H), 5.58 (d,  $J = 1.2$  Hz, 2H), 3.99-3.84 (m, 4H), 3.21 (dd,  $J = 14.4, 1.0$  Hz, 2H), 2.99 (dd,  $J = 14.4, 1.2$  Hz, 2H), 1.08 (t,  $J = 7.2$  Hz, 6H); **6o**: 7.19-7.13 (m, 1H), 5.50-5.35 (m, 1H), 4.28-4.11 (m, 2H), 3.48 (s, 1H), 1.27 (dt,  $J = 22.8, 7.2$  Hz, 3H);  $^{13}\text{C NMR}$  (100 MHz,  $\text{CDCl}_3$ ):  $\delta$  201.0, 195.9, 167.5, 162.6 (d,  $J = 2.0$  Hz), 149.2, 142.1, 140.0, 138.9, 137.9, 137.7, 137.0, 136.5, 134.9, 134.8, 132.6, 132.5, 131.1, 131.0, 129.8, 129.5, 128.9, 128.7, 128.6, 128.5, 128.3, 128.1, 128.0, 127.9, 127.8, 127.5, 127.1, 126.9, 126.3, 125.6, 122.4, 122.3, 60.9, 56.5, 44.1, 39.7, 38.2, 37.3, 29.7, 28.9, 14.2 (d,  $J = 4.0$  Hz), 13.9; HRMS (ESI):  $m/z$  calcd for  $\text{C}_{28}\text{H}_{29}\text{BrO}_5\text{Na}$  [ $\text{M}+\text{Na}$ ] $^+$  547.1096, found 547.1080.

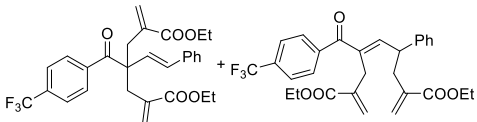

[Reaction time: 6 h]; **4p/6p**: 159 mg, 62%, a yellow oil mixture, 1.4:1 *rr*; IR (thin film):  $\nu_{\max}$  2928, 1716, 1683, 1326, 1170, 1132, 950, 755, 697  $\text{cm}^{-1}$ ;  $^1\text{H NMR}$  (400 MHz,  $\text{CDCl}_3$ ):  $\delta$  **4p**: 8.04-7.99 (m, 2H), 7.61 (dd,  $J = 8.8, 0.8$  Hz, 2H), 7.33-7.27 (m, 3H), 7.25-7.20 (m, 2H), 6.35 (d,  $J = 1.2$  Hz, 2H), 6.23 (d,  $J = 1.2$  Hz, 2H), 5.60 (d,  $J = 1.2$  Hz, 2H), 3.98-3.83 (m, 4H), 3.22 (dd,  $J = 14.4, 1.2$  Hz, 2H), 3.01 (dd,  $J = 14.4, 1.2$  Hz, 2H), 1.07 (t,  $J = 7.2$  Hz, 6H); **6p**: 7.68 (dd,  $J = 14.4, 8.4$  Hz, 2H), 7.16-7.13 (m, 1H), 6.15 (dd,  $J = 9.6, 1.3$  Hz, 1H), 5.42 (dt,  $J = 4.1, 1.4$  Hz, 1H), 4.24-5.13 (m, 2H), 3.52 (s, 1H), 1.27 (dt,  $J = 22.8, 7.2$  Hz, 3H);  $^{13}\text{C NMR}$  (100 MHz,  $\text{CDCl}_3$ ):  $\delta$  **4p/6p**: 202.7, 196.3, 167.5, 166.6 (d,  $J = 5.0$  Hz), 137.7, 137.0, 136.4, 131.2, 130.9, 129.9, 129.7, 128.9, 128.6, 128.5, 128.0, 127.5, 127.3, 127.0, 149.8, 141.9, 141.3, 140.2, 137.9, 137.7 (d,  $J = 4.0$  Hz), 136.9, 136.4, 133.1, 131.2, 130.9, 129.9, 129.7, 128.9, 128.6, 128.5, 128.0, 127.5, 127.3, 127.0, 126.3, 125.6, 125.2 (d,  $J = 3.0$  Hz), 125.1 (d,  $J = 4.0$  Hz), 125.0, 60.9, 56.5, 44.3, 39.4, 37.3, 29.7, 32.0, 28.8, 22.8, 14.2 (d,  $J = 4.0$  Hz), 13.9;  $^{19}\text{F NMR}$  (376 MHz,  $\text{CDCl}_3$ ): -63.1; HRMS (ESI):  $m/z$  calcd for  $\text{C}_{29}\text{H}_{29}\text{O}_5\text{Na}$  [ $\text{M}+\text{Na}$ ] $^+$  537.1865, found 537.1845.

## VIII. References

1. B. A. Trofimov, E. Y. Schmidt, N. V. Zorina, E. V. Ivanova, I. A. Ushakov, *J. Org. Chem.* 2012, **77**, 6880–6886.
2. N. S. Camilo, H. Santos, L. A. Zeoly, F. S. Fernandes, M. T. Rodrigues, T. S. Silva, S. R. Lima, J. C. Serafim, A. S. B. de Oliveira, A. G. Carpanez, et al, *Eur. J. Org. Chem.*, 2022, **2022**, e202101448.
3. B. Basel, A. Hassner, *J. Org. Chem.*, 2000, **65**, 6368–6380.

# IX. Copies of NMR for all new compounds

## <sup>1</sup>H NMR and <sup>13</sup>C NMR Spectra for Compound 3a

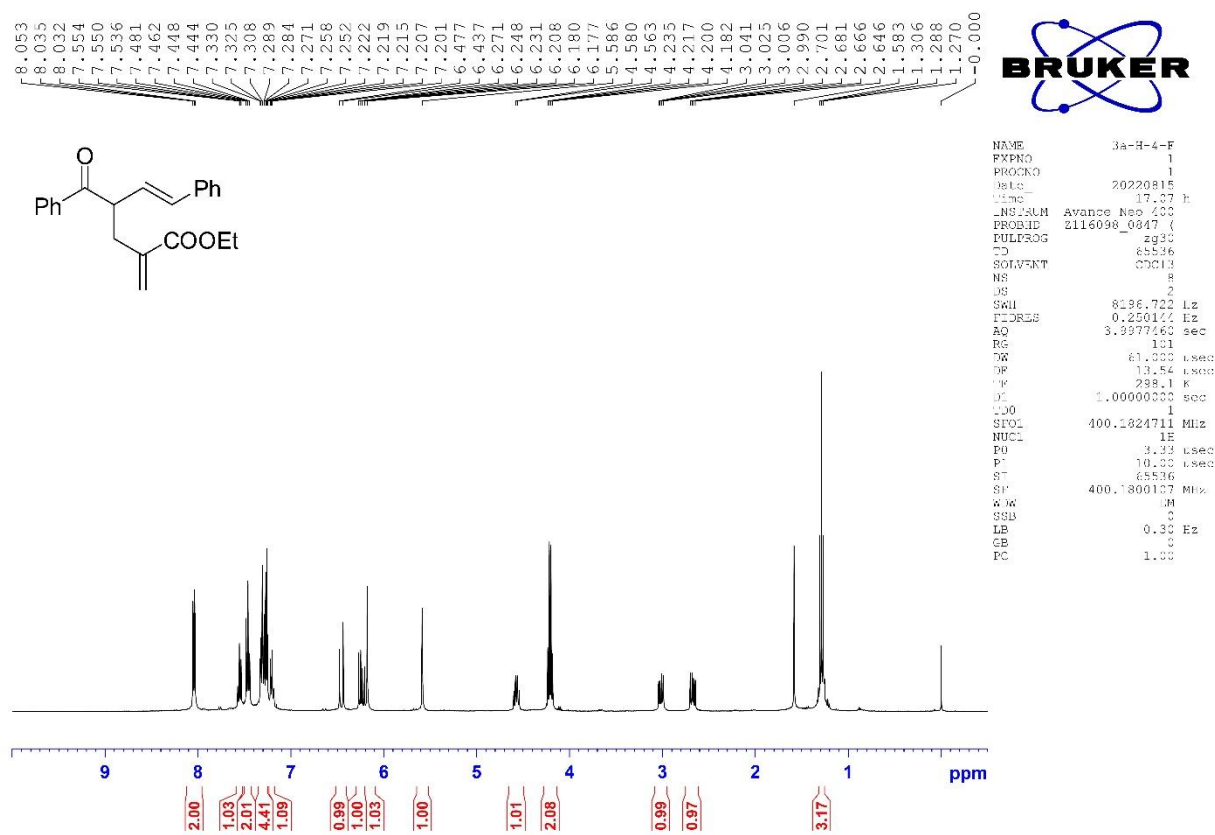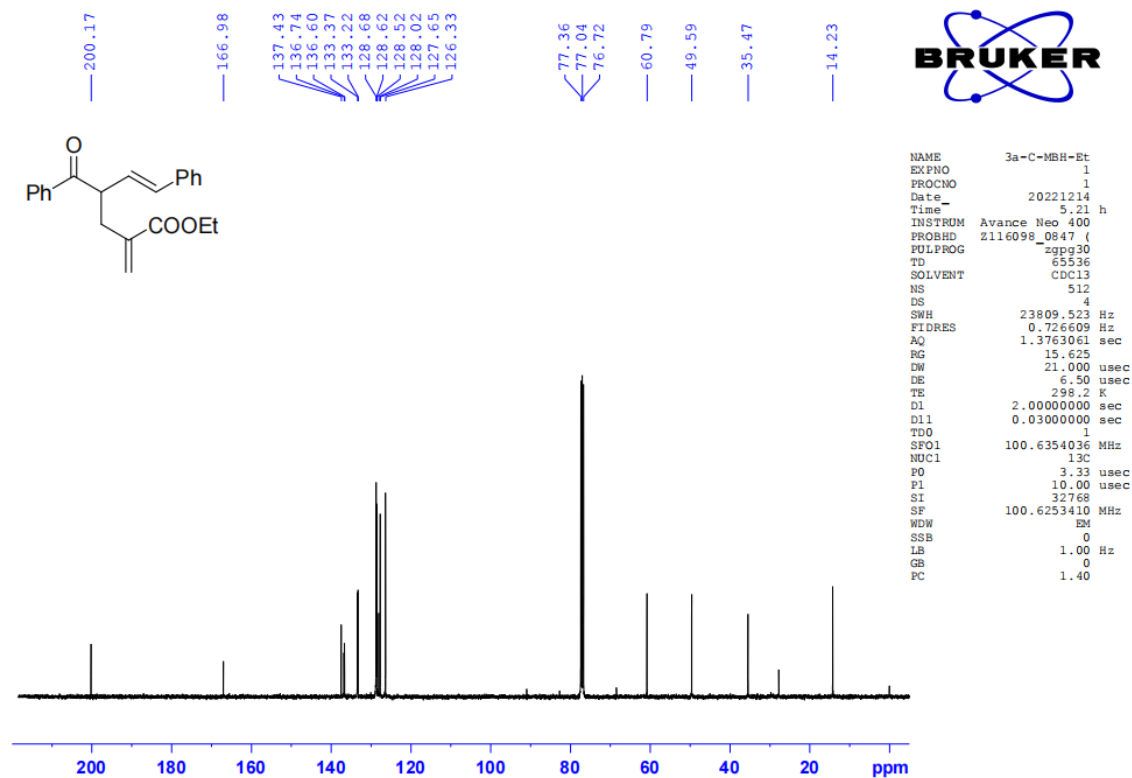

<sup>1</sup>H NMR and <sup>13</sup>C NMR Spectra for Compound 3b

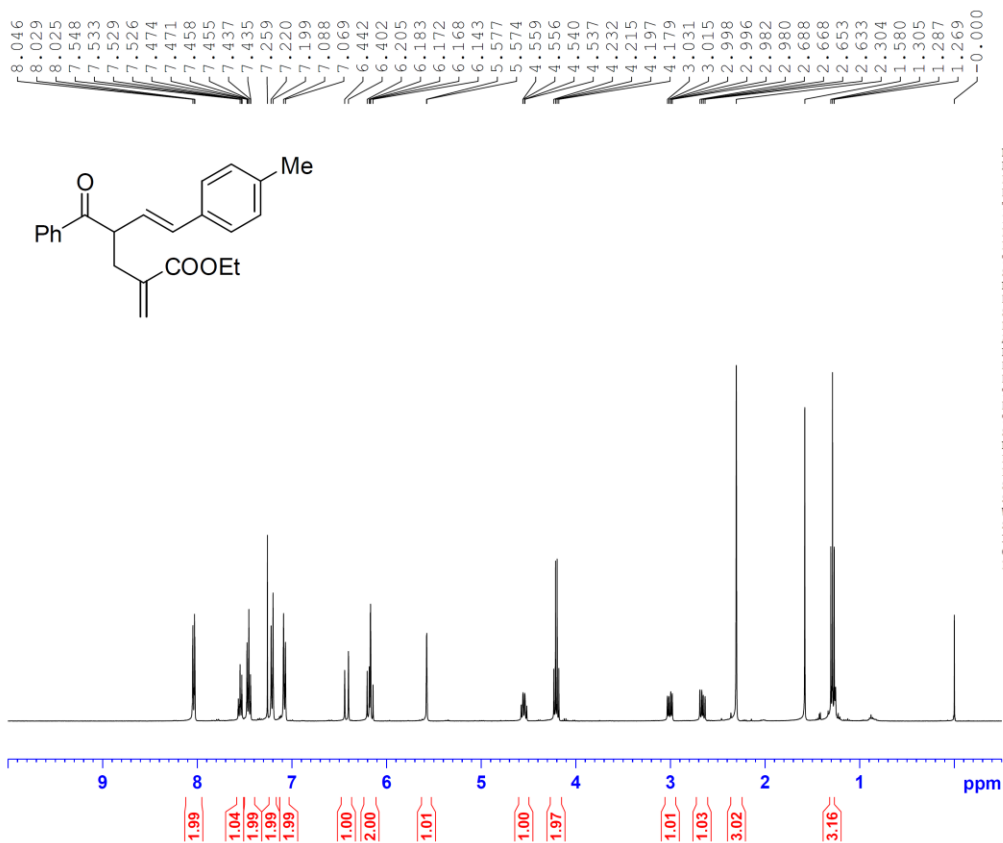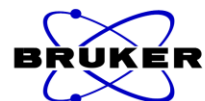

```

NAME      3f-H-4-MePh
EXPNO    1
PROCNO   1
Date_    20220704
Time     16.22 h
INSTRUM  Avance Neo 400
PROBHD   Z116098_0847 (
PULPROG  zg30
TD        65536
SOLVENT  CDCl3
NS        8
DS        2
SWH       8196.722 Hz
FIDRES    0.250144 Hz
AQ        3.9977460 sec
RG        401
DW        61.000 usec
DE        13.54 usec
TE        298.1 K
D1        1.00000000 sec
TDO       1
SFO1     400.1824711 MHz
NUC1      1H
P0        3.33 usec
P1        10.00 usec
SI        65536
SF        400.1800997 MHz
WDW       EM
SSB       0
LB        0.30 Hz
GB        0
PC        1.00
    
```

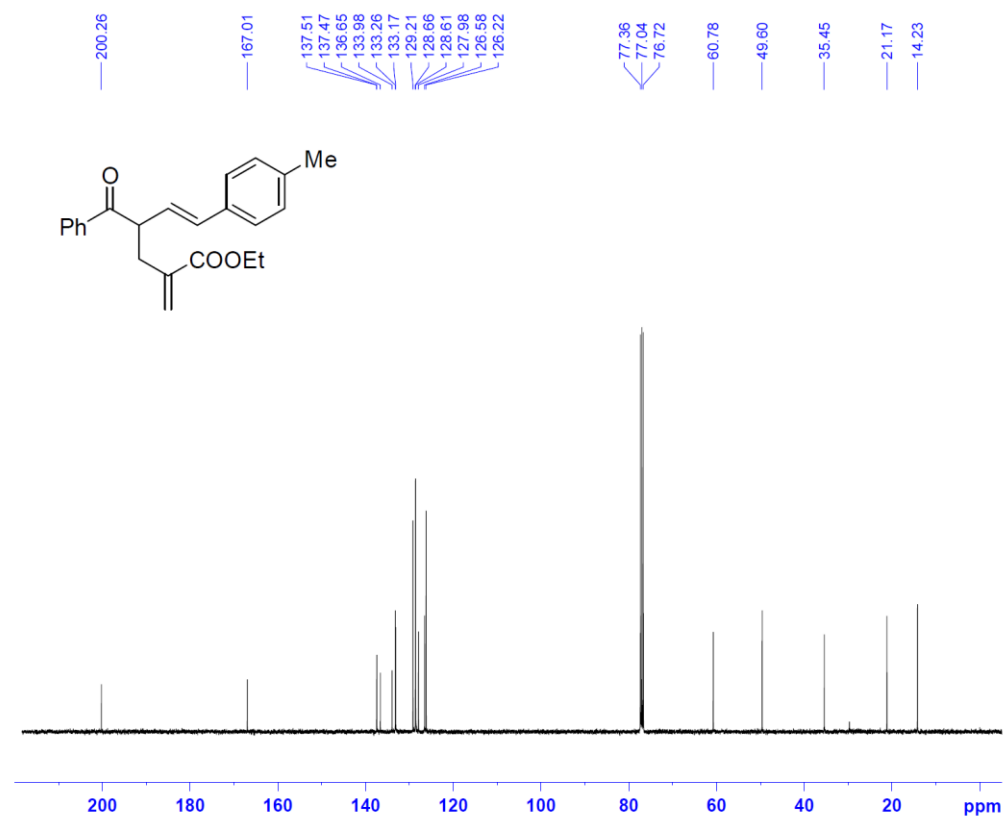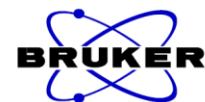

```

NAME      3f-C-4-MePh
EXPNO    1
PROCNO   1
Date_    20220715
Time     21.56 h
INSTRUM  Avance Neo 400
PROBHD   Z116098_0847 (
PULPROG  zgpg30
TD        65536
SOLVENT  CDCl3
NS        512
DS        4
SWH       23809.523 Hz
FIDRES    0.726609 Hz
AQ        1.3763061 sec
RG        15.625
DW        21.000 usec
DE        6.50 usec
TE        298.2 K
D1        2.00000000 sec
D11       0.03000000 sec
TDO       1
SFO1     100.6354036 MHz
NUC1      13C
P0        3.33 usec
P1        10.00 usec
SI        32768
SF        100.6253410 MHz
WDW       EM
SSB       0
LB        1.00 Hz
GB        0
PC        1.40
    
```



<sup>1</sup>H NMR and <sup>13</sup>C NMR Spectra for Compound 3c

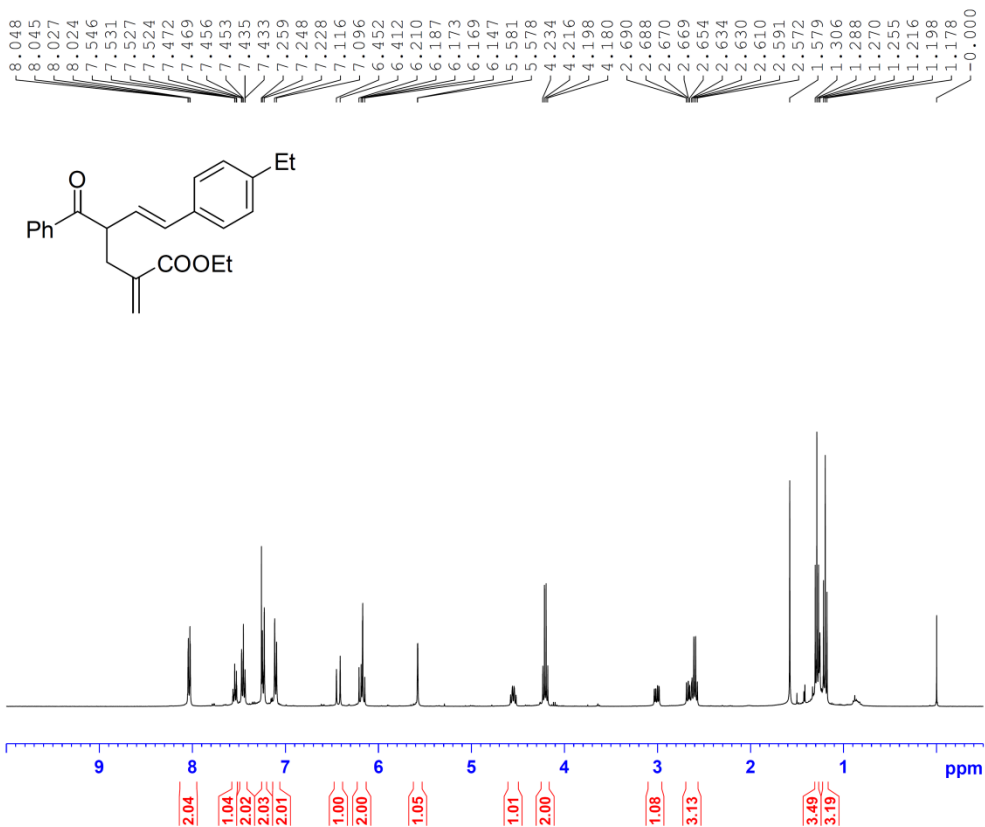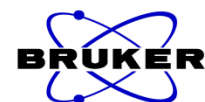

```

NAME      3g-H-4-EtPh
EXPNO    1
PROCNO   1
Date_    20220704
Time     16.27 h
INSTRUM  Avance Neo 400
PROBHD   Z116098_0847 (
PULPROG  zg30
TD        65536
SOLVENT  CDCl3
NS        8
DS        2
SWH       8196.722 Hz
FIDRES    0.250144 Hz
AQ        3.9977460 sec
RG        101
DW        61.000 usec
DE        13.54 usec
TE        298.1 K
D1        1.00000000 sec
TDO       1
SF01     400.1824711 MHz
NUC1      1H
P0        3.33 usec
P1        10.00 usec
SI        65536
SF        400.1800096 MHz
WDW       EM
SSB       0
LB        0.30 Hz
GB        0
PC        1.00
    
```

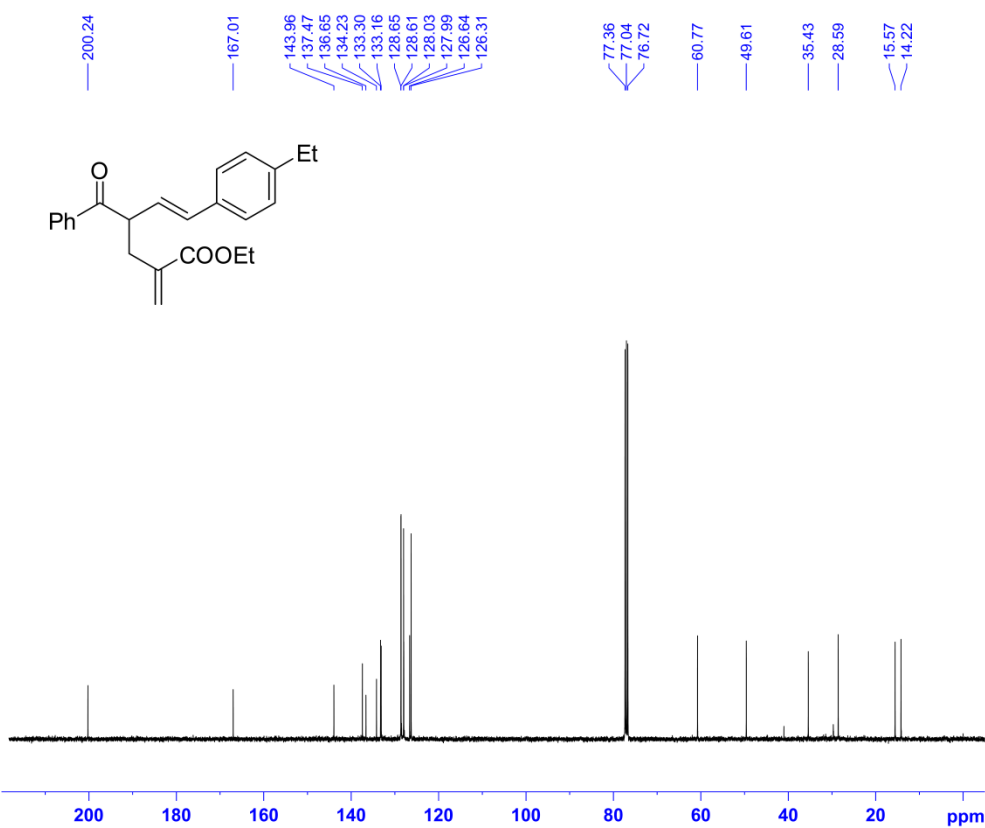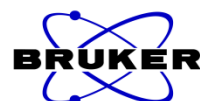

```

NAME      3g-C-4-EtPh
EXPNO    1
PROCNO   1
Date_    20220715
Time     21.23 h
INSTRUM  Avance Neo 400
PROBHD   Z116098_0847 (
PULPROG  zgpg30
TD        65536
SOLVENT  CDCl3
NS        512
DS        4
SWH       23809.523 Hz
FIDRES    0.726609 Hz
AQ        1.3763061 sec
RG        15.625
DW        21.000 usec
DE        6.50 usec
TE        298.1 K
D1        2.00000000 sec
D11       0.03000000 sec
TDO       1
SF01     100.6354036 MHz
NUC1      13C
P0        3.33 usec
P1        10.00 usec
SI        32768
SF        100.6253410 MHz
WDW       EM
SSB       0
LB        1.00 Hz
GB        0
PC        1.40
    
```

<sup>1</sup>H NMR and <sup>13</sup>C NMR Spectra for Compound 3d

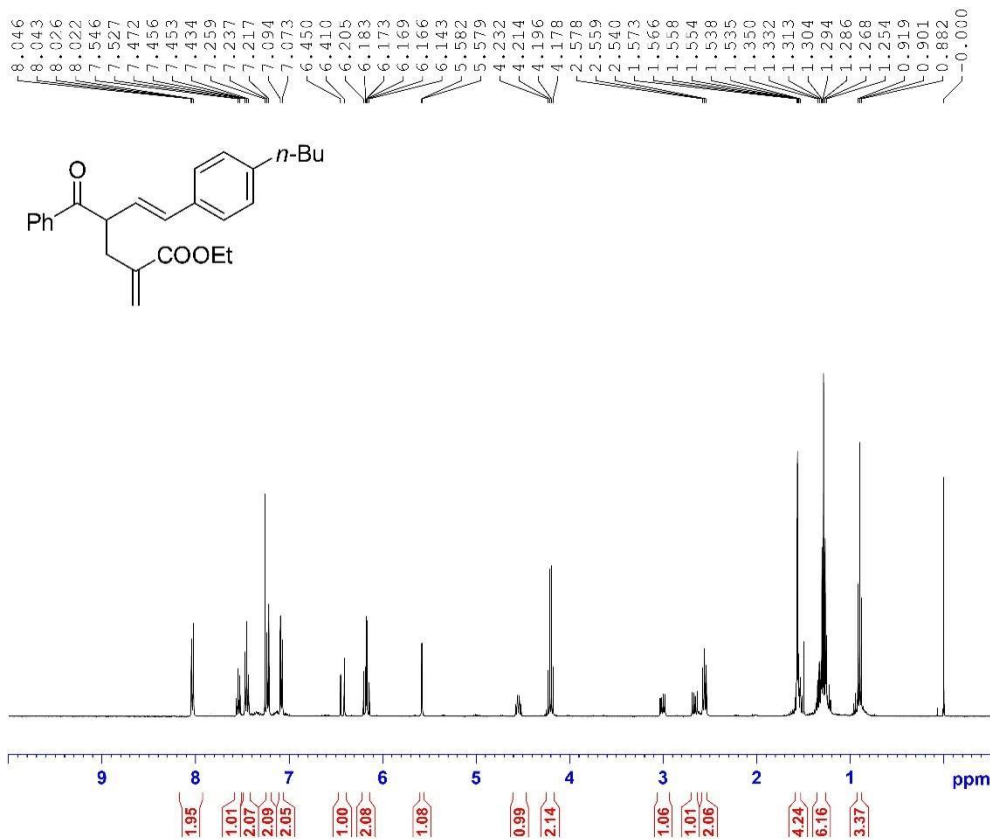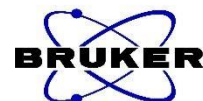

```

NAME      3d-4-n-BuPh
EXPNO     2
PROCNO    1
Date_     20220614
Time      13.44 h
INSTRUM   Avance Neo 400
PROBHD    Z116098 084 / 1
PULPROG   zgpg30
TD         65536
SOLVENT   CDCl3
NS         8
DS         2
SWH        8196.122 Hz
FIDRES     0.253144 Hz
AQ         3.3977460 sec
RG         101
DM         61.000 usec
DE         13.54 usec
TE         298.2 K
EI         1.00000000 sec
TDO        1
SFO1       100.6253584 MHz
NUC1       13C
PQ         3.33 usec
PI         10.00 usec
SI         32768
SF         100.6253584 MHz
WDW        EM
SSB        0
LB         1.00 Hz
GB         0
PC         1.40
    
```

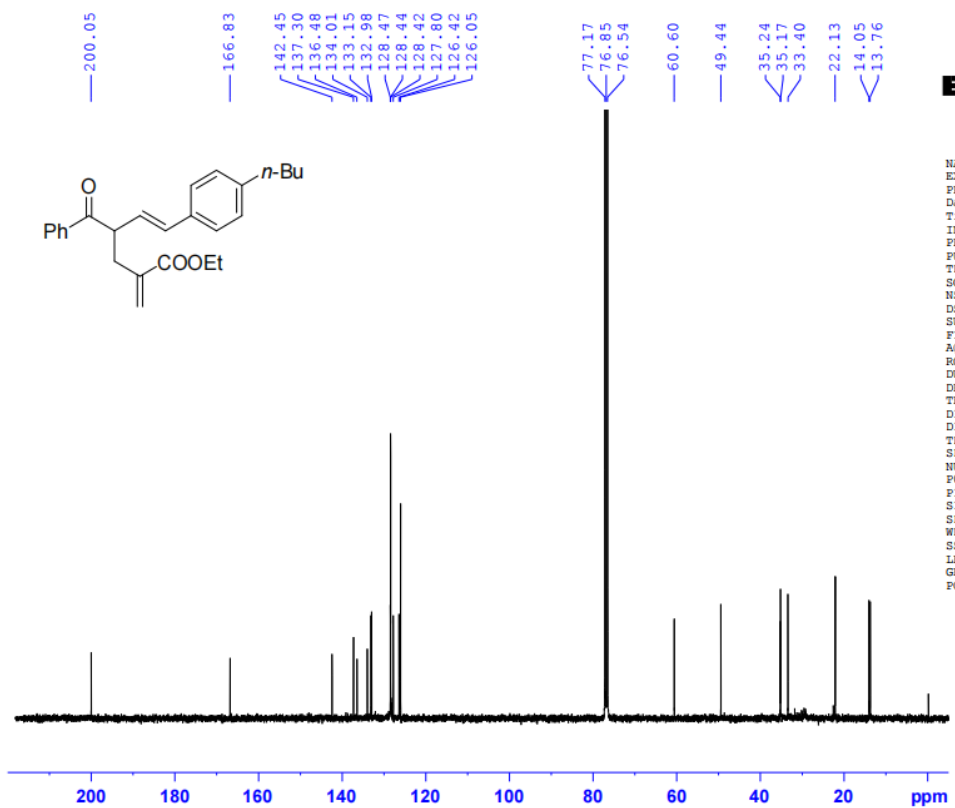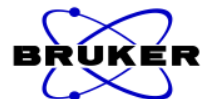

```

NAME      3d-C-4-n-Bu
EXPNO     1
PROCNO    1
Date_     20230103
Time      20.28 h
INSTRUM   Avance Neo 400
PROBHD    Z116098 0847 / 1
PULPROG   zgpg30
TD         65536
SOLVENT   CDCl3
NS         1024
DS         4
SWH        23809.523 Hz
FIDRES     0.726609 Hz
AQ         1.3763061 sec
RG         15.625
DM         21.000 usec
DE         6.50 usec
TE         298.2 K
D1         2.00000000 sec
D11        0.03000000 sec
TDO        1
SFO1       100.6354036 MHz
NUC1       13C
PQ         3.33 usec
PI         10.00 usec
SI         32768
SF         100.6253584 MHz
WDW        EM
SSB        0
LB         1.00 Hz
GB         0
PC         1.40
    
```

<sup>1</sup>H NMR and <sup>13</sup>C NMR Spectra for Compound 3e

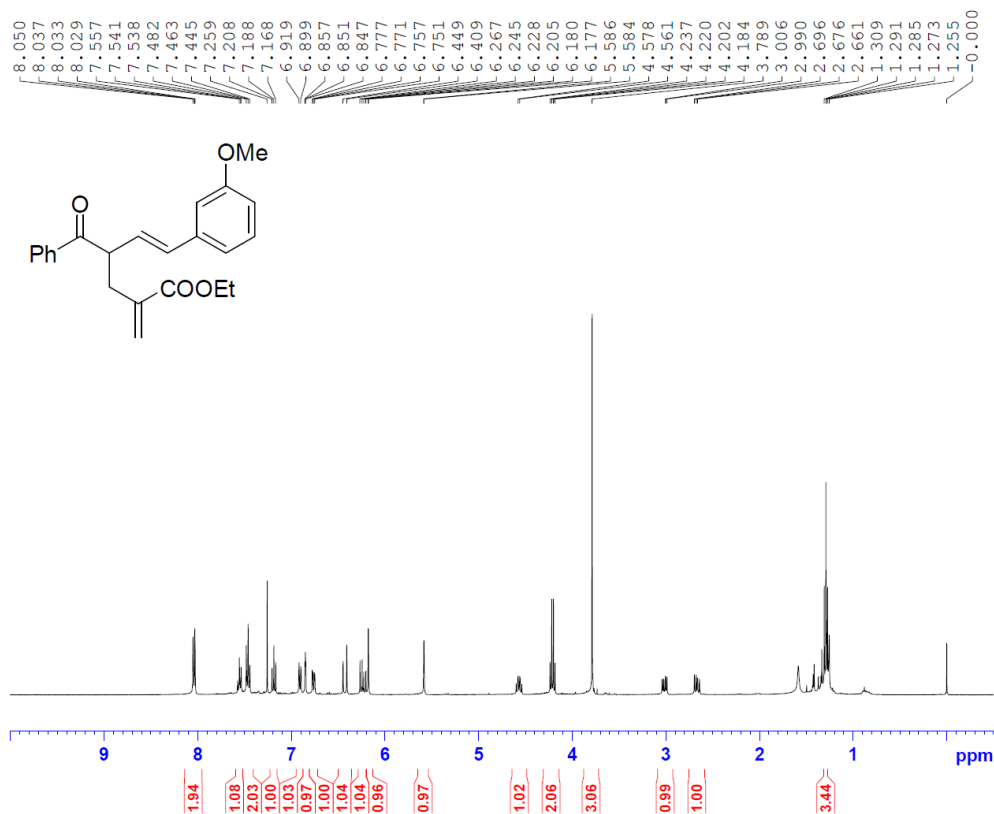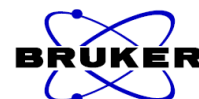

```

NAME      3-H-3-MeOPh
EXPNO     1
PROCNO    1
Date_     20220815
Time      17.12 h
INSTRUM   Avance Neo 400
PROBHD    Z116098_0847 (
PULPROG   zg30
TD        65536
SOLVENT   CDCl3
NS         8
DS         2
SWH       8196.722 Hz
FIDRES    0.250144 Hz
AQ        3.9977460 sec
RG         101
EW        61.000 usec
DE        13.54 usec
TE        298.2 K
D1        1.00000000 sec
TD0       1
SF01      400.1824711 MHz
NUC1      1H
PO        3.33 usec
P1        10.00 usec
SI        65536
SF        400.1800101 MHz
WDW       EM
SSB       0
LB        0.30 Hz
GB        0
PC        1.00
    
```

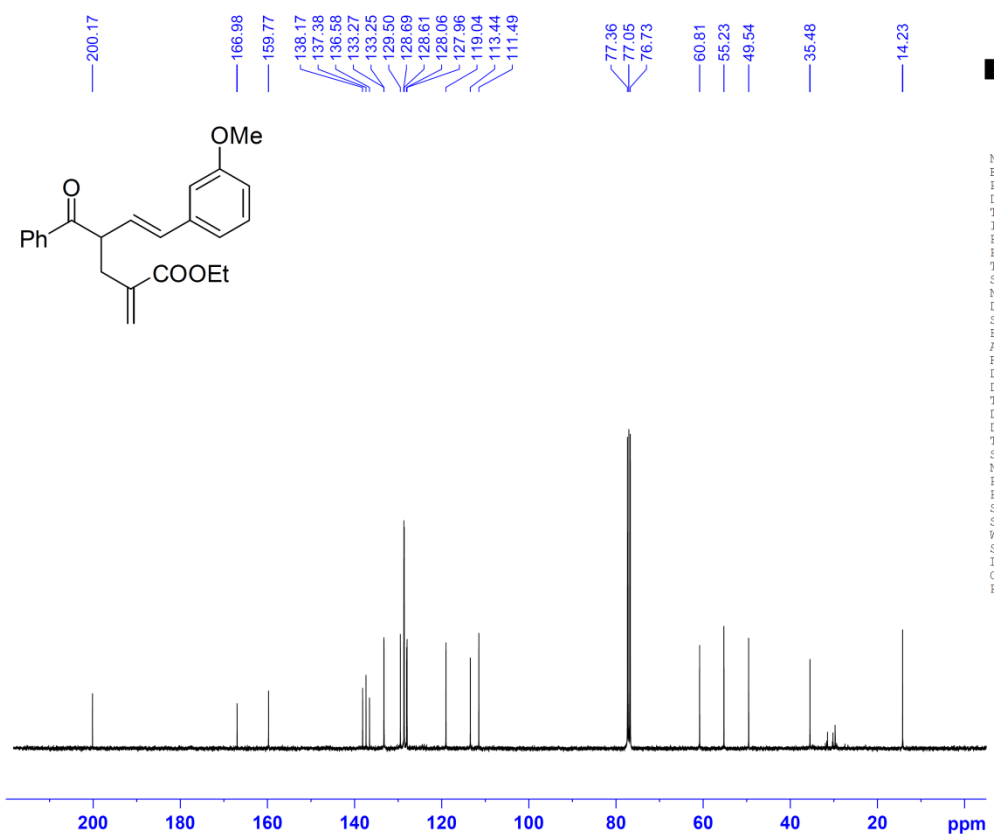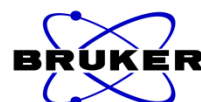

```

NAME      3-C-3-MeOPh
EXPNO     1
PROCNO    1
Date_     20220829
Time      23.57 h
INSTRUM   Avance Neo 400
PROBHD    Z116098_0847 (
PULPROG   zgpg30
TD        65536
SOLVENT   CDCl3
NS         512
DS         4
SWH       23809.523 Hz
FIDRES    0.726609 Hz
AQ        1.3763061 sec
RG         15.625
DW        21.000 usec
DE        6.50 usec
TE        298.2 K
D1        2.00000000 sec
D11       0.03000000 sec
TD0       1
SF01      100.6354036 MHz
NUC1      13C
PO        3.33 usec
P1        10.00 usec
SI        32768
SF        100.6253410 MHz
WDW       EM
SSB       0
LB        1.00 Hz
GB        0
PC        1.40
    
```

<sup>1</sup>H NMR and <sup>13</sup>C NMR Spectra for Compound 3f

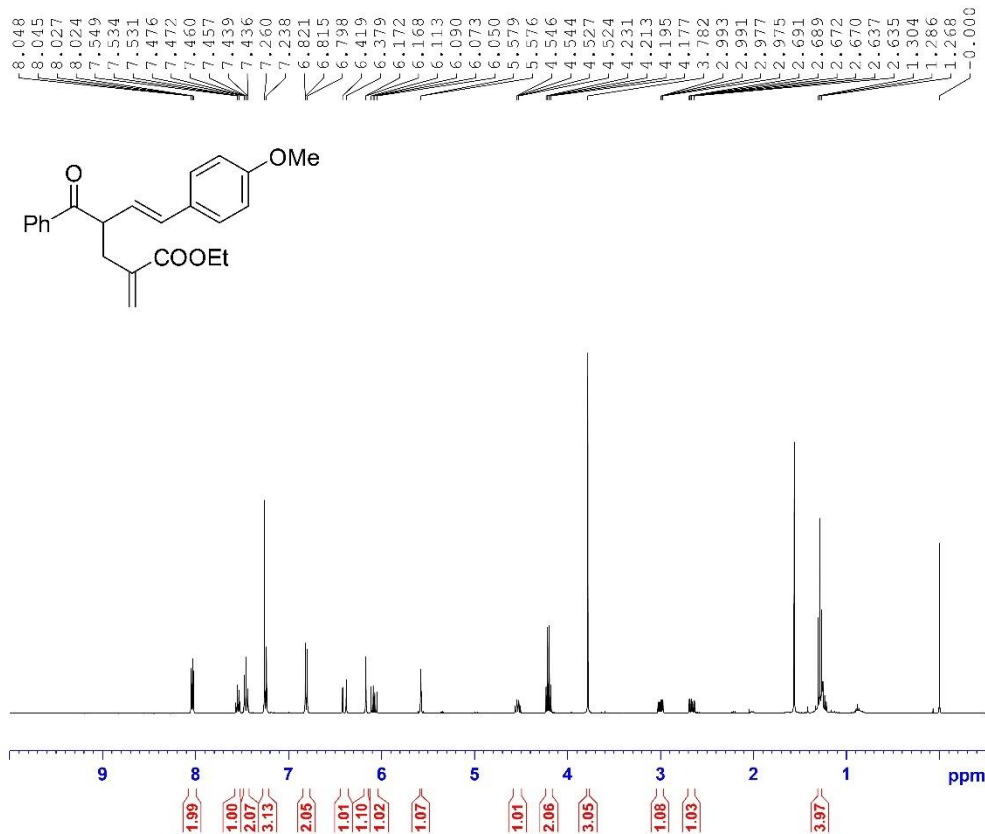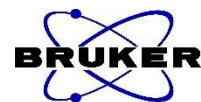

```

NAME      3f-F-4-MeOPh
EXPNO     1
PROCNO    1
Date_     20230614
Time      13.36 h
INSTRUM   Avance Neo 400
PROBHD    Z116098_0847
PULPROG   zgpg30
TD         65536
SOLVENT   CDCl3
NS         8
DS         8
SWH        8196.722 Hz
FIDRES     0.250144 Hz
AQ         3.9977460 sec
RG         101
DW         61.000 usec
DE         13.54 usec
TE         298.1 K
D1         1.00000000 sec
TDO        1
SF01       400.182411 MHz
NUC1       1H
P0         3.33 usec
F1         10.00 usec
SI         65536
SF         400.1800089 MHz
WDW        EM
SSB        0
LB         0.30 Hz
GB         0
PC         1.00
    
```

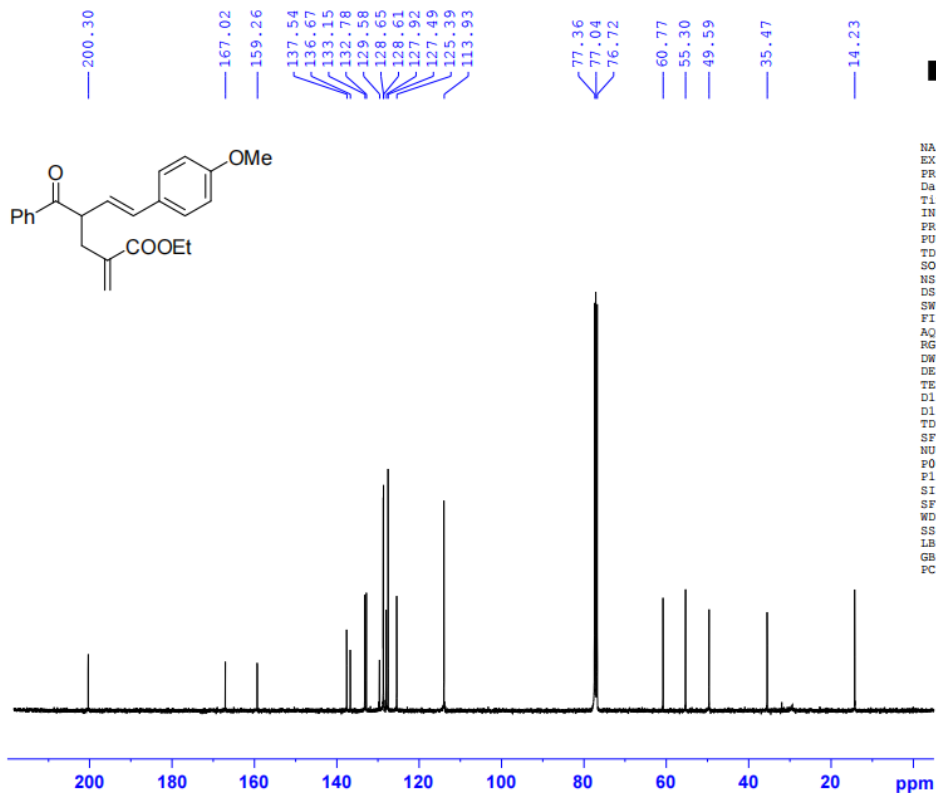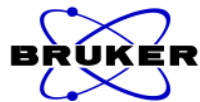

```

NAME      3f-C-4-Ome
EXPNO     1
PROCNO    1
Date_     20230103
Time      21.32 h
INSTRUM   Avance Neo 400
PROBHD    Z116098_0847
PULPROG   zgpg30
TD         65536
SOLVENT   CDCl3
NS         1024
DS         4
SWH        23809.523 Hz
FIDRES     0.726609 Hz
AQ         1.3763061 sec
RG         15.625
DW         21.000 usec
DE         6.50 usec
TE         298.1 K
D1         2.00000000 sec
D11        0.03000000 sec
TDO        1
SF01       100.6354036 MHz
NUC1       13C
P0         3.33 usec
F1         10.00 usec
SI         32768
SF         100.6253410 MHz
WDW        EM
SSB        0
LB         1.00 Hz
GB         0
PC         1.40
    
```

<sup>1</sup>H NMR, <sup>13</sup>C NMR and <sup>19</sup>F NMR Spectra for Compound 3g

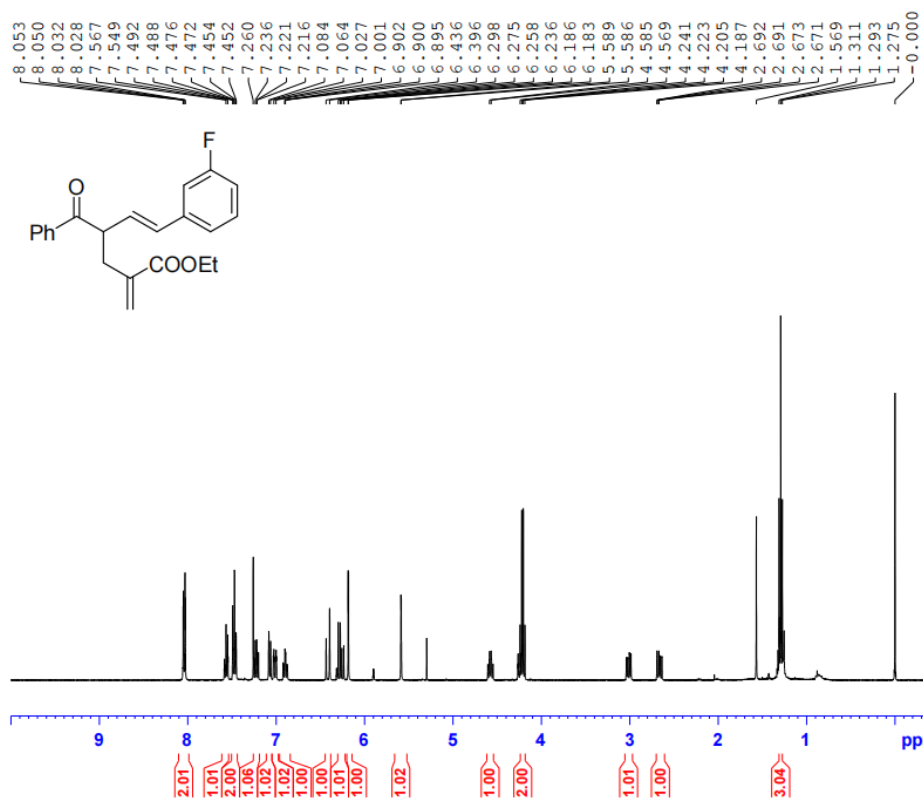

**BRUKER**

```

NAME          3g-H-3-F
EXPNO         1
PROCNO        1
Date_         20221231
Time_         14.42 h
INSTRUM       Avance Neo 400
PROBHD        Z116098_0847 (
PULPROG       zg30
TD            65536
SOLVENT       CDCl3
NS            8
DS            2
SWH           8196.722 Hz
FIDRES        0.250144 Hz
AQ            3.9977460 sec
RG            101
DW            61.000 usec
DE            13.54 usec
TE            298.1 K
D1            1.00000000 sec
TD0           1
SF01          400.1824711 MHz
NUC1          1H
PO            3.33 usec
P1            10.00 usec
SI            65536
SF            400.1800094 MHz
WDW           EM
SSB           0
LB            0.30 Hz
GB            0
PC            1.00
    
```

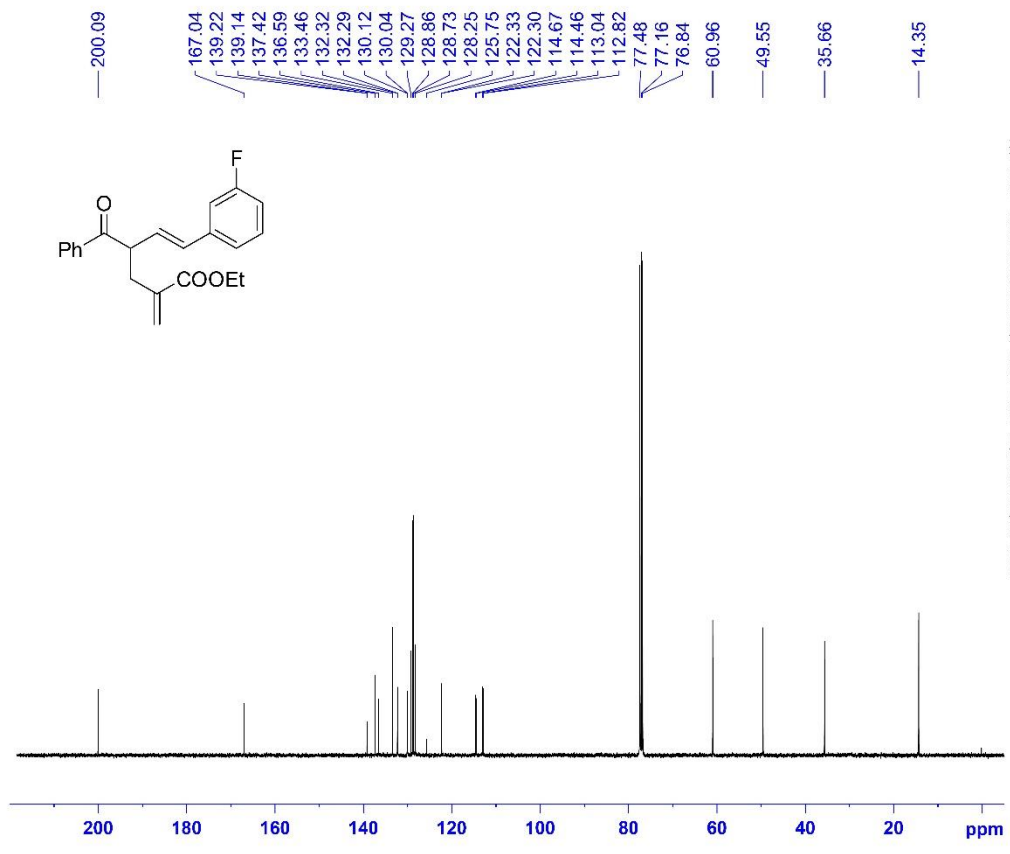

**BRUKER**

```

NAME          3g-C-3-F
EXPNO         1
PROCNO        1
Date_         20230110
Time_         19.37 h
INSTRUM       Avance Neo 400
PROBHD        Z116099_0847 (
PULPROG       zgpg30
TD            65536
SOLVENT       CDCl3
NS            1024
DS            4
SWH           23809.523 Hz
FIDRES        0.726609 Hz
AQ            1.376326 sec
RG            32673
DW            21.000 usec
DE            8.50 usec
TE            298.1 K
D1            2.00000000 sec
E11           0.03000000 sec
TD0           1
SF01          100.6264036 MHz
NUC1          13C
PC            3.33 usec
P1            10.00 usec
SI            32768
SF            100.6233283 MHz
WDW           EM
SSB           0
LB            1.00 Hz
GB            0
PC            1.40
    
```

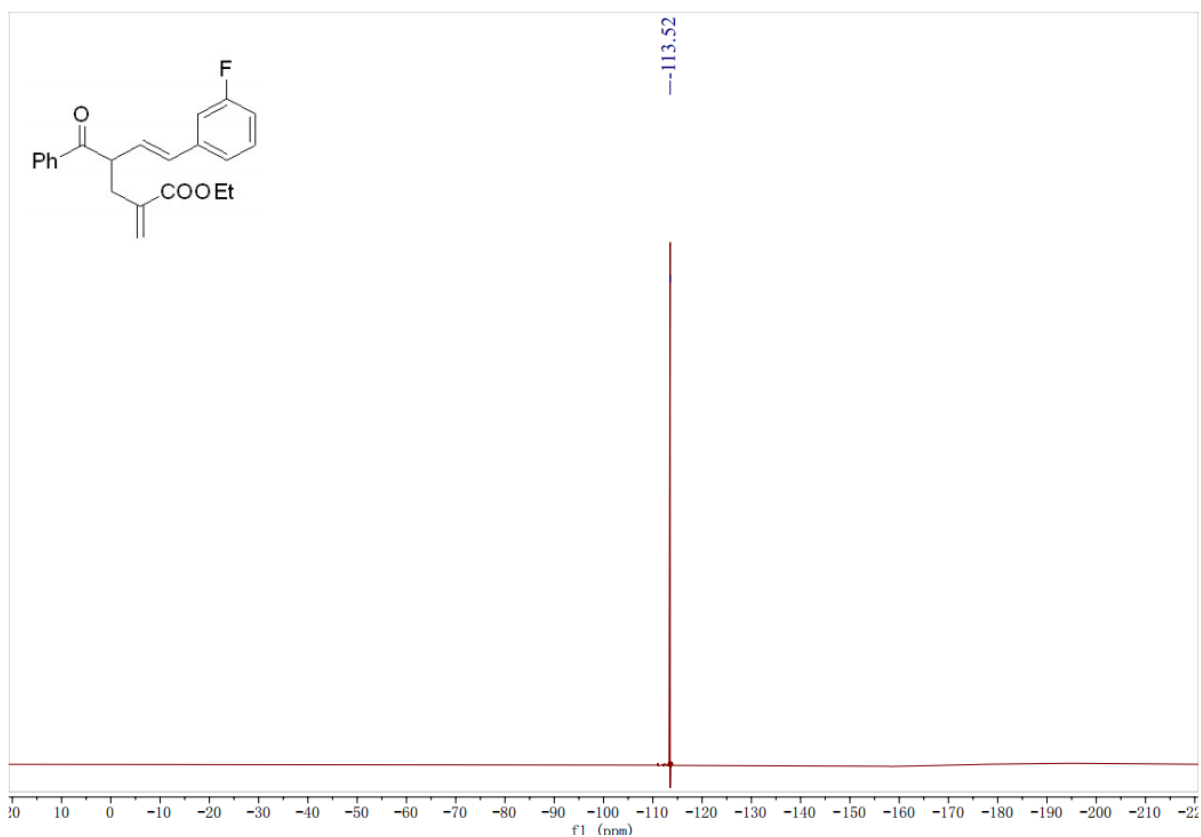

<sup>1</sup>H NMR Spectrum for Compound **3g** (20% DABCO/DCM)

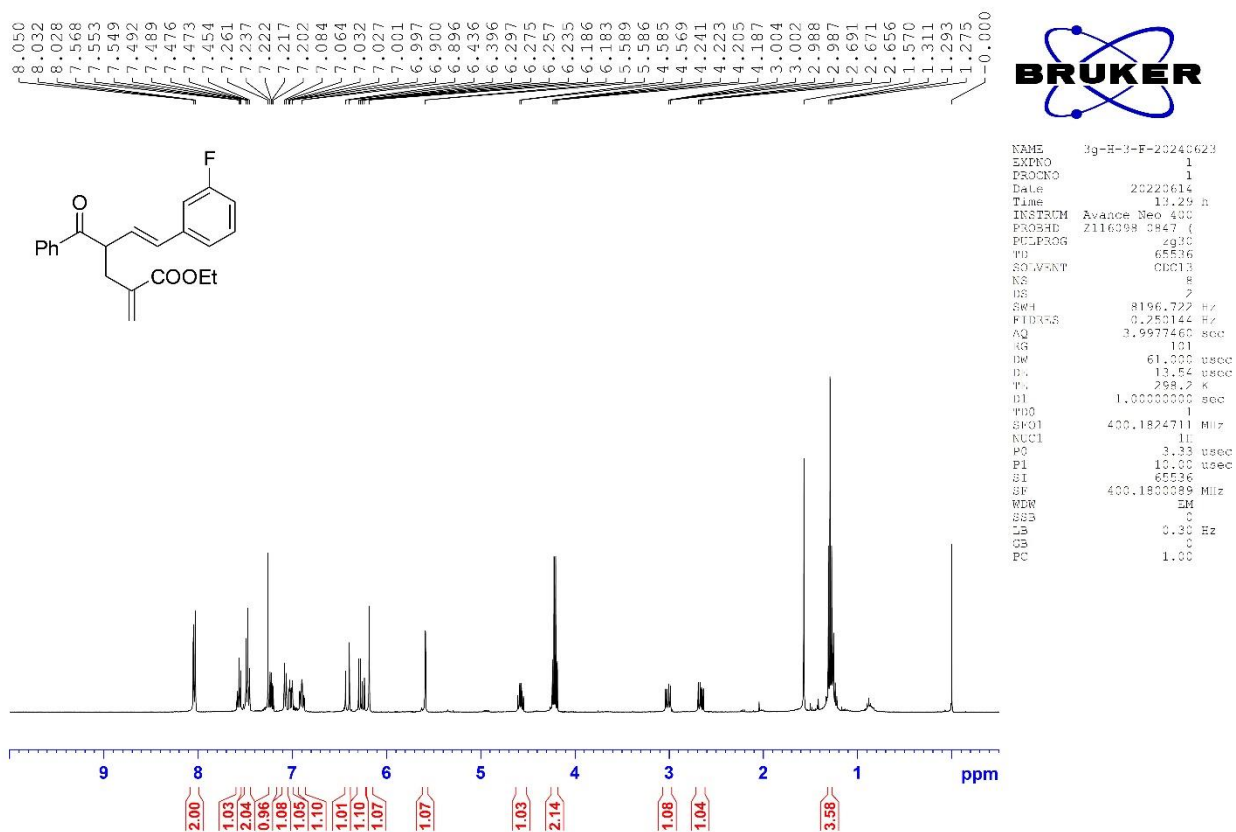

<sup>1</sup>H NMR, <sup>13</sup>C NMR and <sup>19</sup>F NMR Spectra for Compound 3h

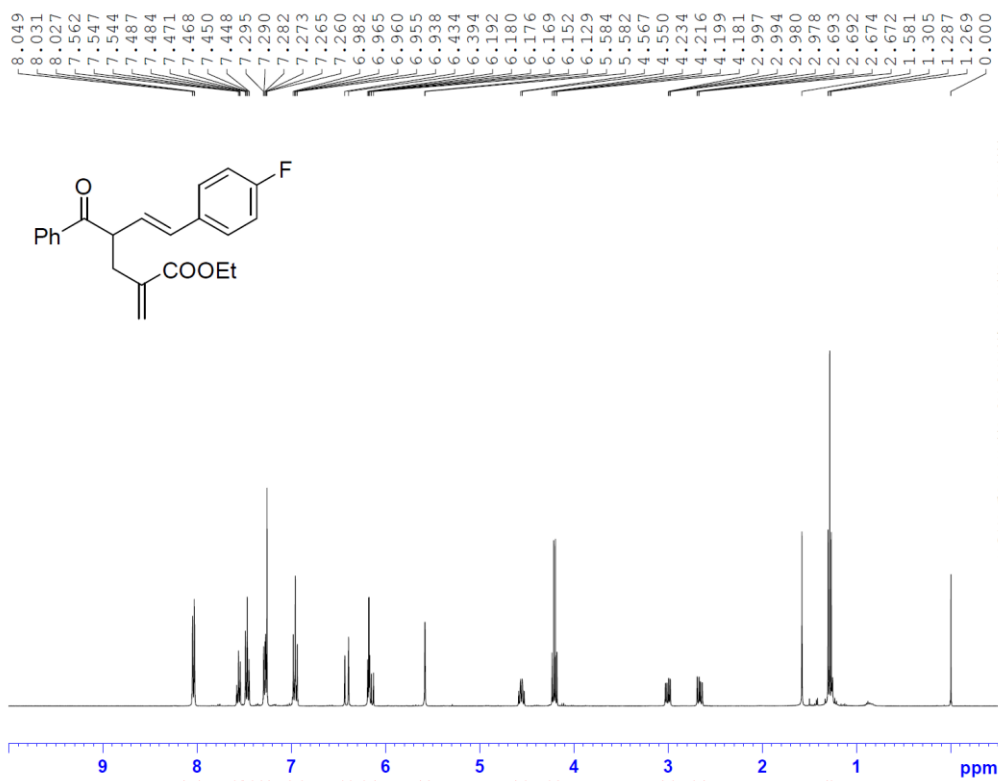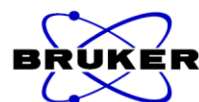

NAME 3b-H-4  
EXPNO 1  
PROCNO 1  
Date\_ 20220622  
Time 15.43 h  
INSTRUM Avance Neo 400  
PROBHD Z116098\_0847 ( )  
PULPROG zg30  
TD 65536  
SOLVENT CDCl3  
NS 8  
DS 2  
SWH 8196.722 Hz  
FIDRES 0.250144 Hz  
AQ 3.9977460 sec  
RG 101  
DW 61.000 usec  
DE 13.54 usec  
TE 298.1 K  
D1 1.00000000 sec  
TD0 1  
SFO1 400.1824711 MHz  
NUC1 1H  
P0 3.33 usec  
P1 10.00 usec  
SI 65536  
SF 400.1800089 MHz  
WDW EM  
SSB 0  
LB 0.30 Hz  
GB 0  
PC 1.00

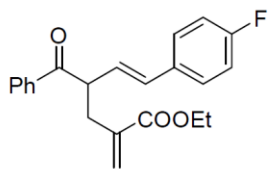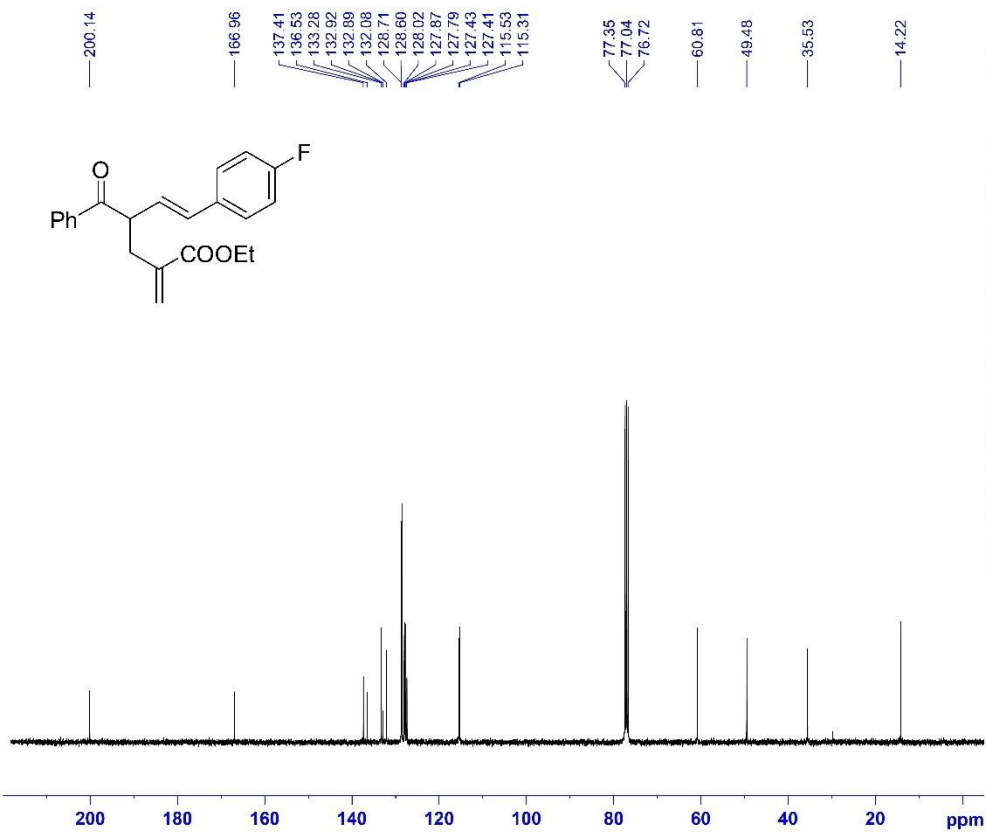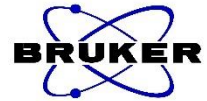

NAME 3b-C-4-EPH  
EXPNO 1  
PROCNO 1  
Date\_ 20220705  
Time 9.35 h  
INSTRUM Avance Neo 400  
PROBHD Z116098\_0847 ( )  
PULPROG zgpg30  
TD 65536  
SOLVENT CDCl3  
NS 4  
DS 2  
SWH 23809.523 Hz  
FIDRES 0.726609 Hz  
AQ 1.3763061 sec  
RG 13.625  
EW 2.000 usec  
DE 6.50 usec  
TE 298.2 K  
D1 2.00000000 sec  
D11 0.53000000 sec  
TDC 1  
SFO1 100.6254036 MHz  
NUC1 13C  
P0 3.33 usec  
P1 0.00 usec  
SI 32768  
SF 100.6253413 MHz  
WDW HM  
SSB 0  
LB 1.00 Hz  
GB 0  
PC 1.40

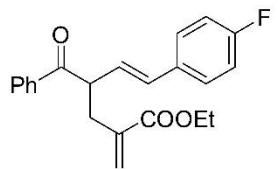

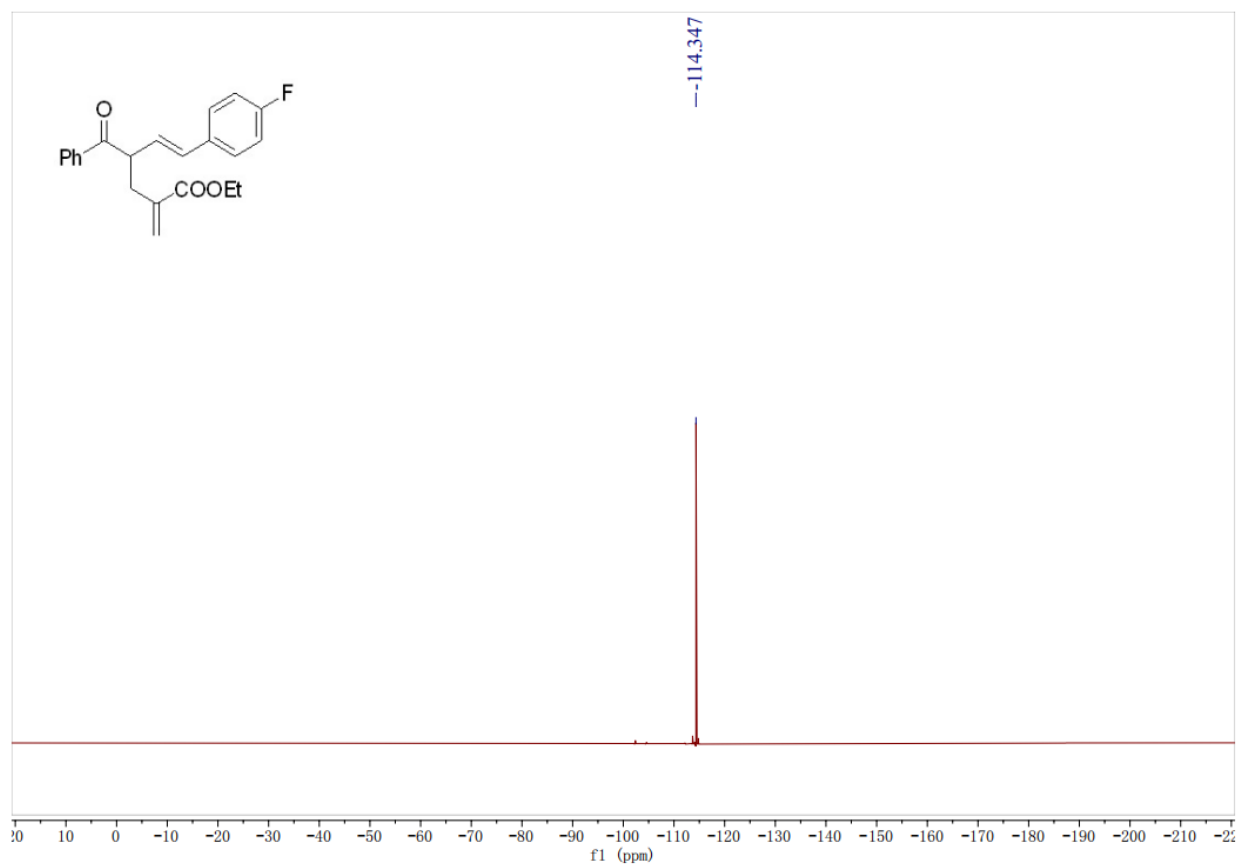



<sup>1</sup>H NMR and <sup>13</sup>C NMR Spectra for Compound 3i

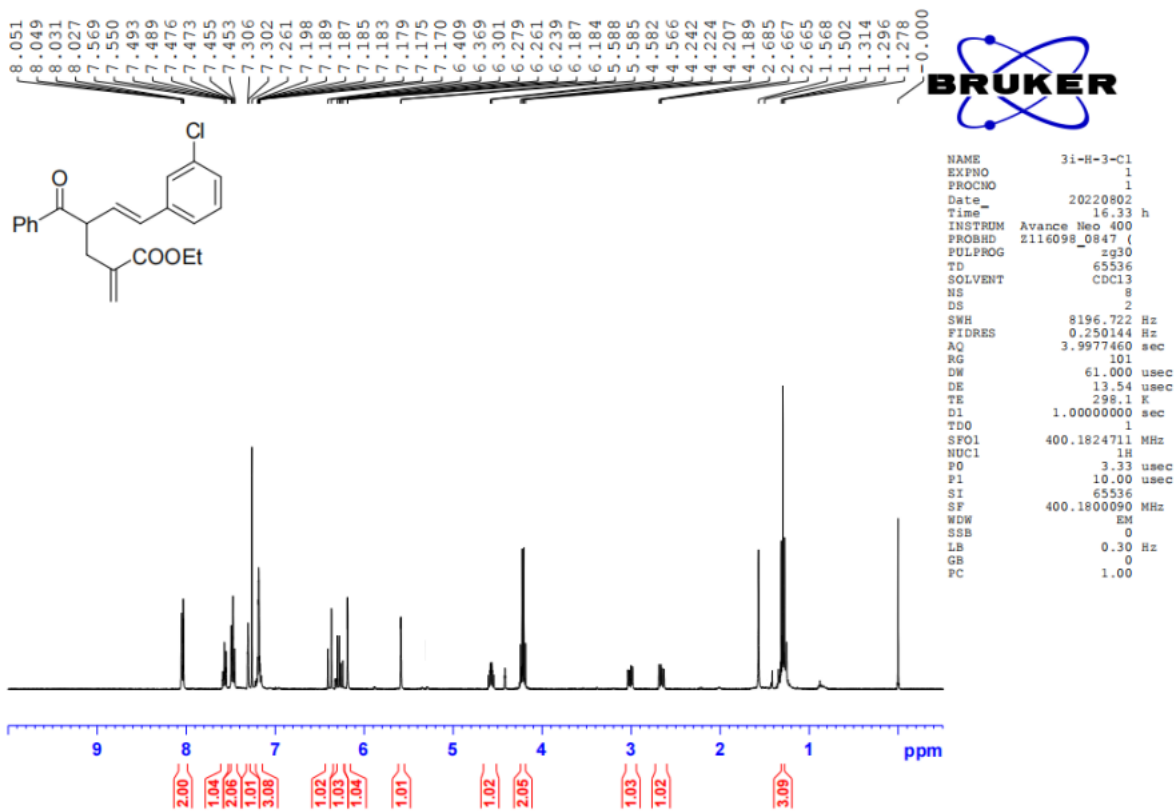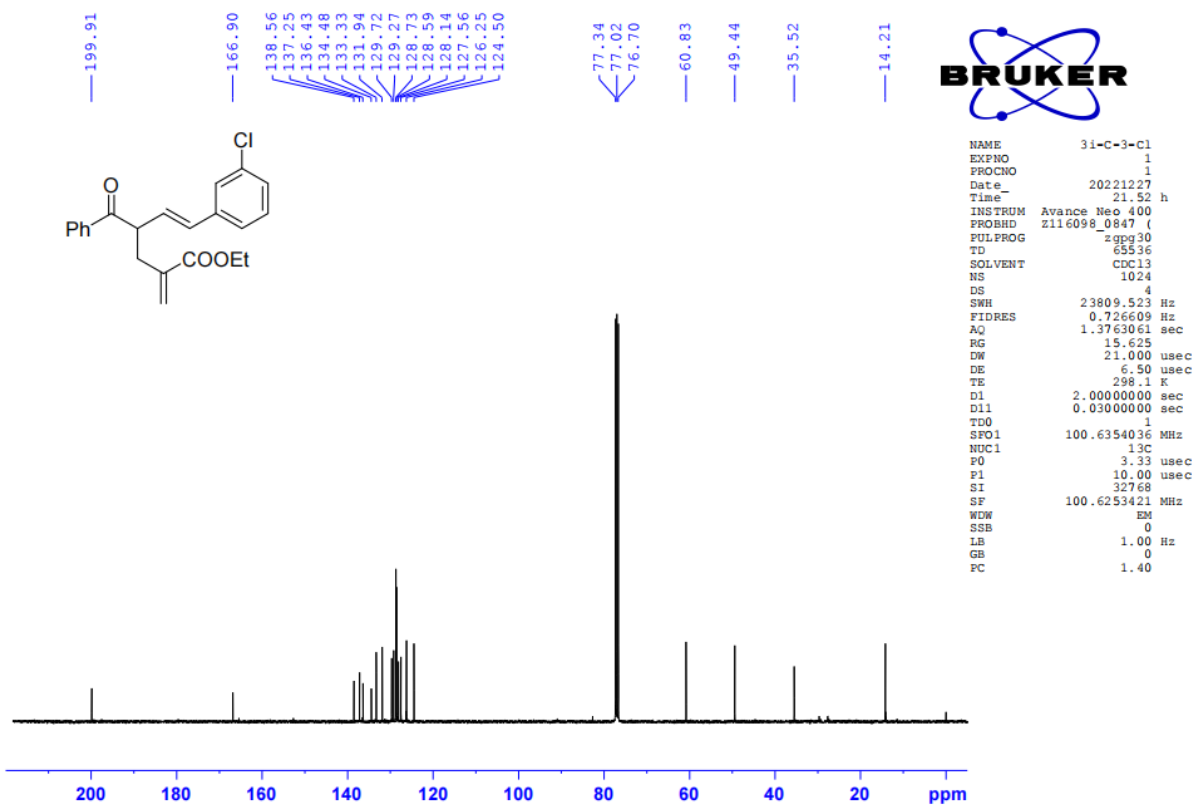

<sup>1</sup>H NMR and <sup>13</sup>C NMR Spectra for Compound 3j

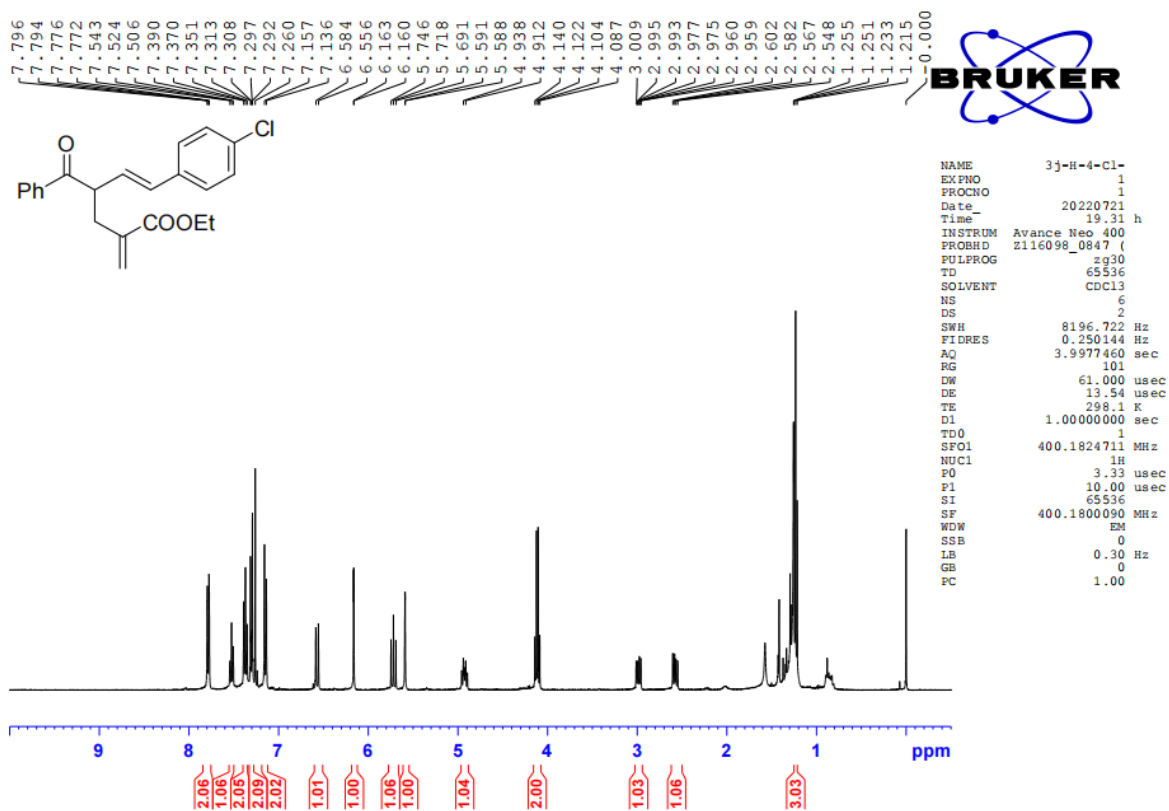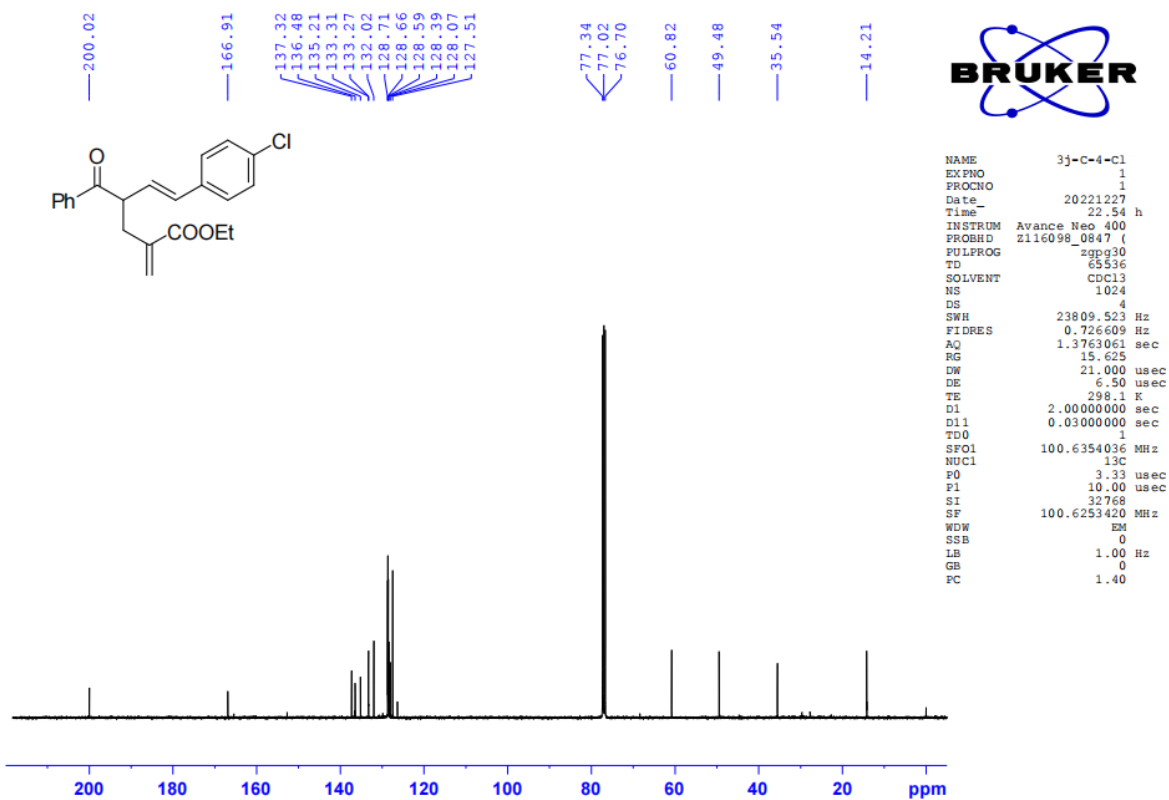

<sup>1</sup>H NMR and <sup>13</sup>C NMR Spectra for Compound 3k

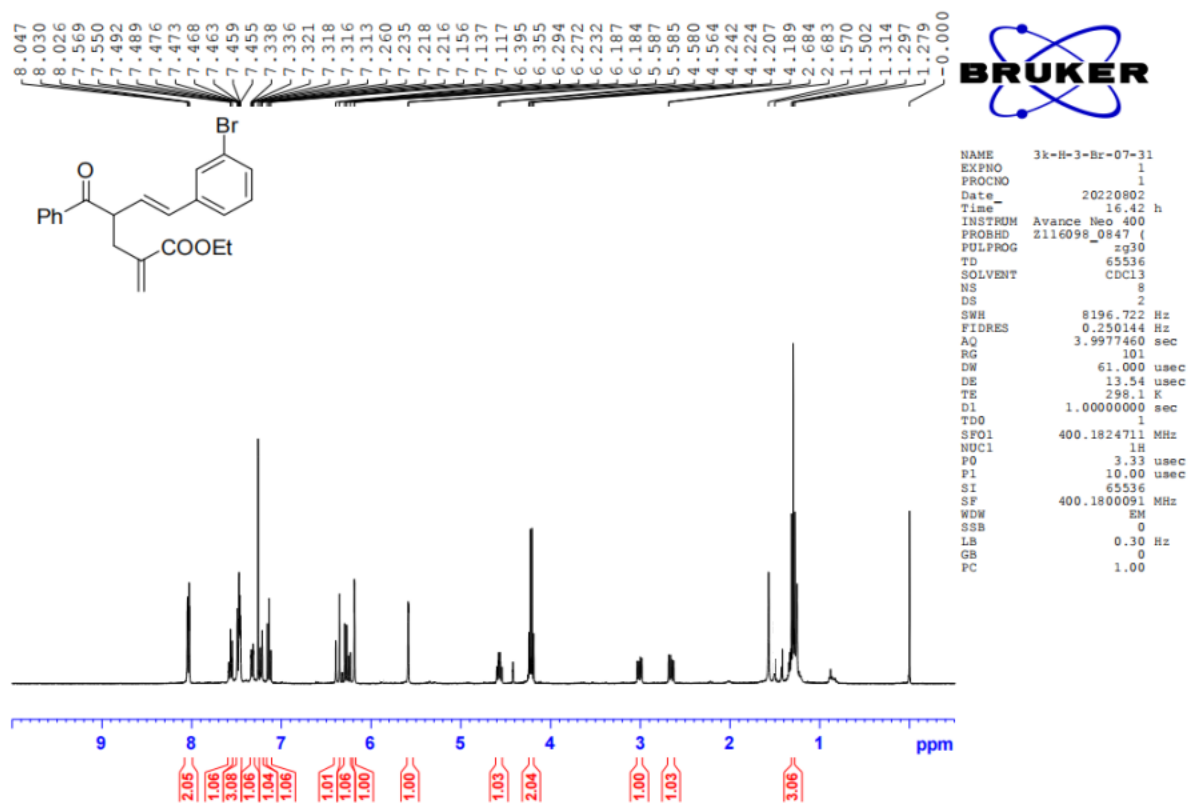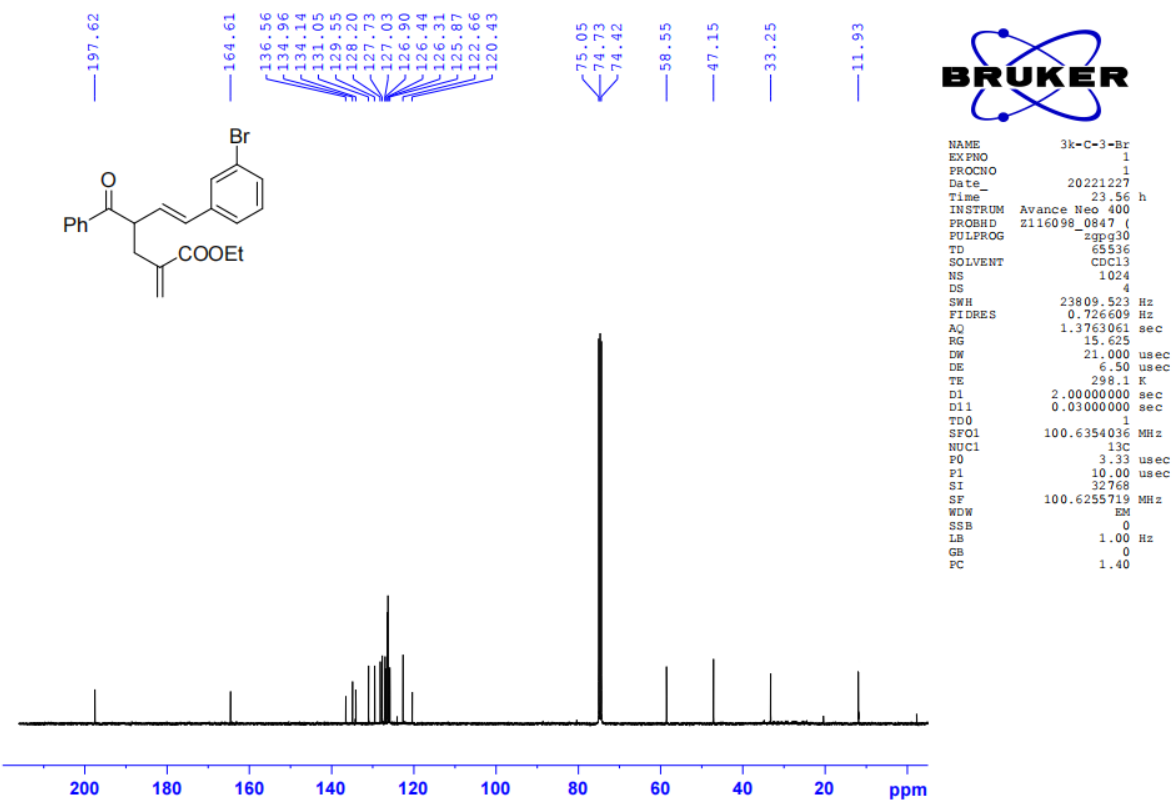

<sup>1</sup>H NMR and <sup>13</sup>C NMR Spectra for Compound 31

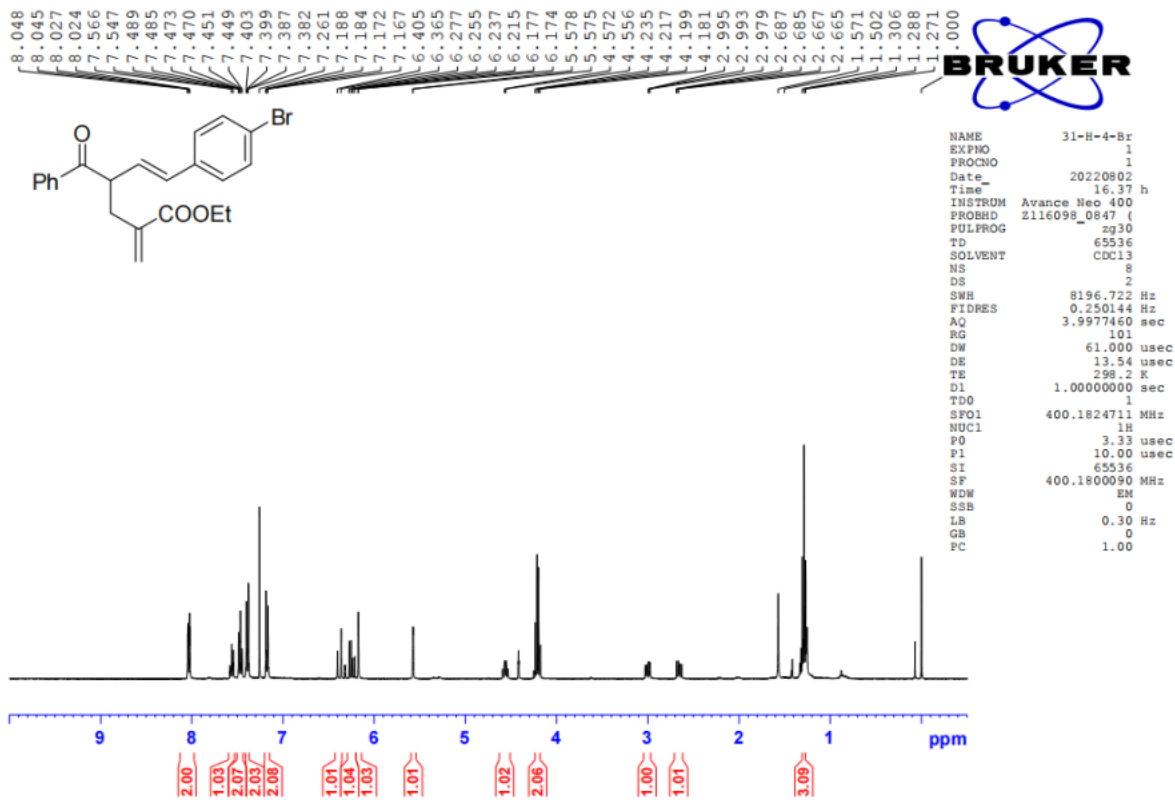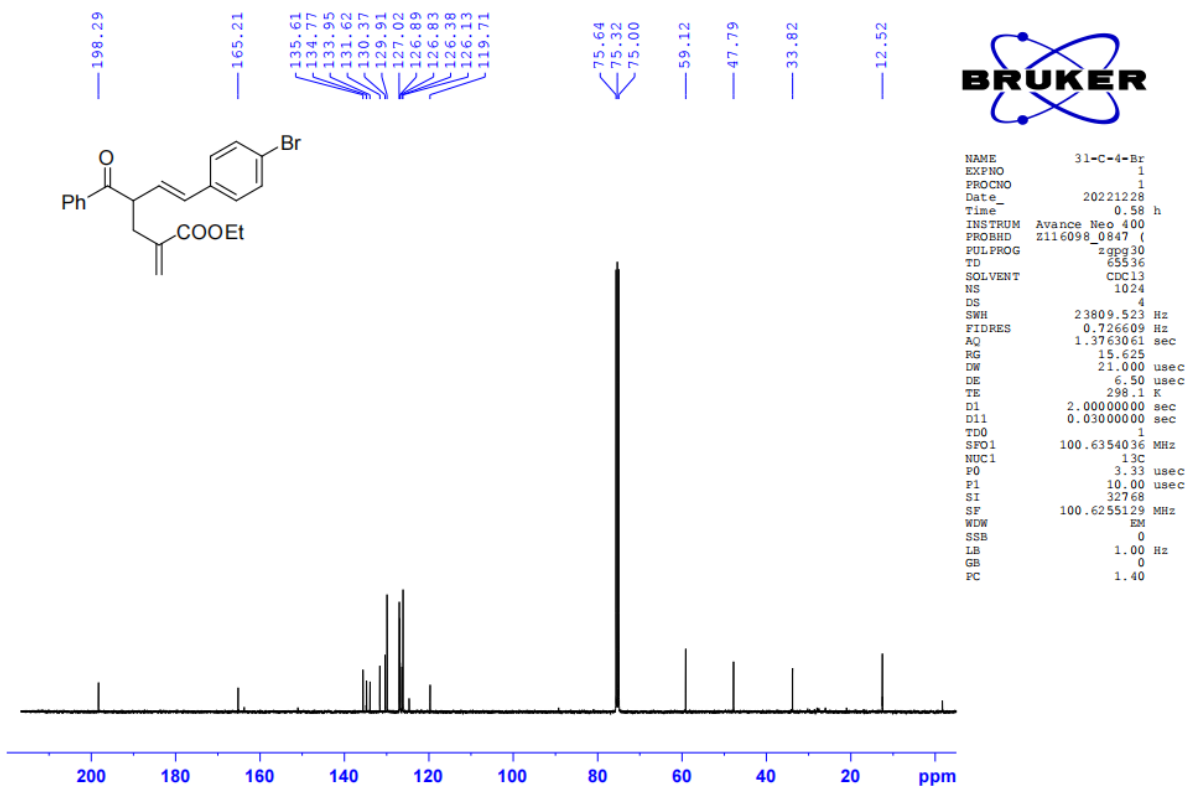

<sup>1</sup>H NMR and <sup>13</sup>C NMR Spectra for Compound 3m

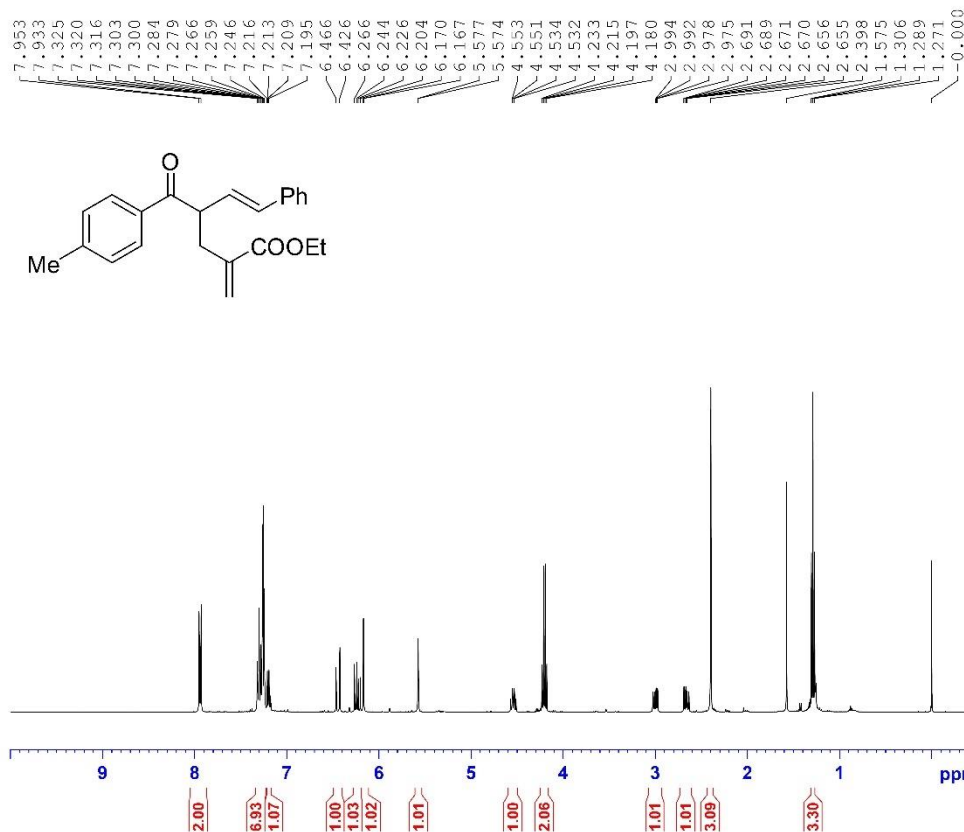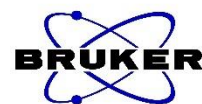

```

NAME      3-C-4'-Me
EXPNO     1
PROCNO    1
Date_     20220622
Time      15.34 h
INSTRUM   Avance Neo 400
PROBHD    z116098_0847 (
PULPROG   zgpg30
TD         65536
SOLVENT   CDCl3
NS         8
DS         2
SWH        8196.722 Hz
FIDRES     0.250144 Hz
AQ         3.9977460 sec
RG         101
DW         61.000 usec
DE         13.34 usec
TE         298.2 K
D1         2.00000000 sec
D11        0.03000000 sec
TDO        1
SFO1       400.1824711 MHz
NUC1       13C
PC         3.33 usec
P1         10.00 usec
SI         65536
SF         400.1824711 MHz
WDW        EM
SSB        0
LB         0.30 Hz
GB         0
CB         1.00
EC         1.00
    
```

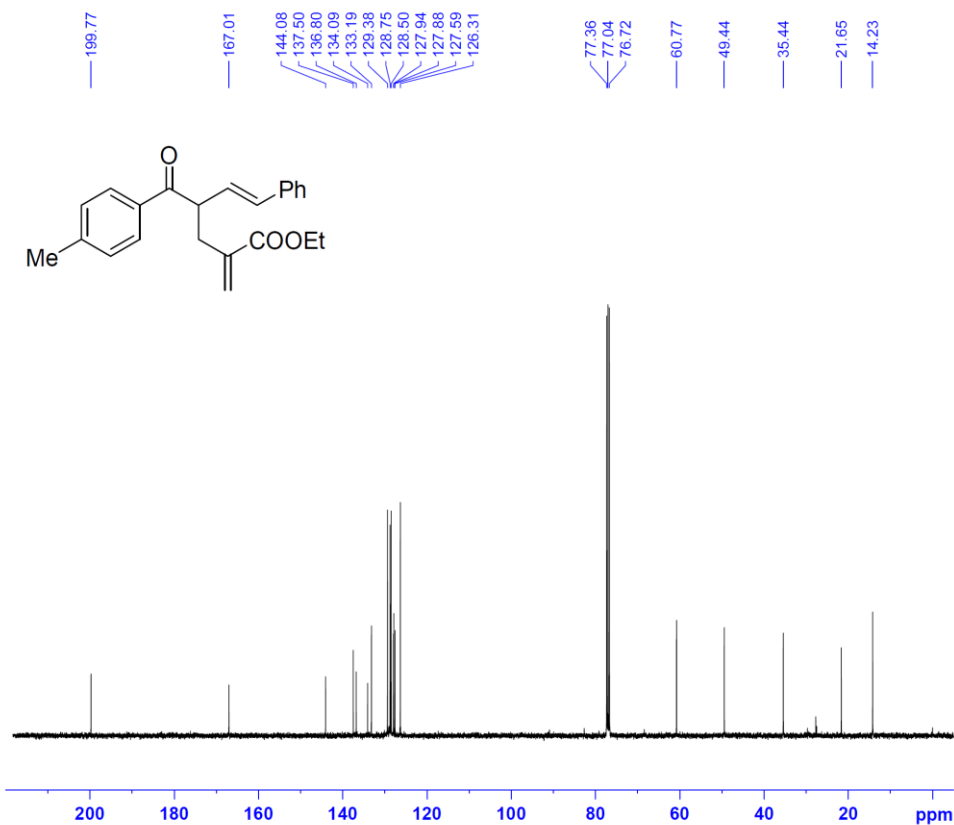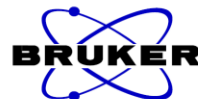

```

NAME      3-C-4'-Me
EXPNO     1
PROCNO    1
Date_     20220705
Time      4.25 h
INSTRUM   Avance Neo 400
PROBHD    z116098_0847 (
PULPROG   zgpg30
TD         65536
SOLVENT   CDCl3
NS         512
DS         4
SWH        23809.523 Hz
FIDRES     0.726609 Hz
AQ         1.3763061 sec
RG         15.625
DW         21.000 usec
DE         6.50 usec
TE         298.2 K
D1         2.00000000 sec
D11        0.03000000 sec
TDO        1
SFO1       100.6354036 MHz
NUC1       13C
PC         3.33 usec
P1         10.00 usec
SI         32768
SF         100.6253410 MHz
WDW        EM
SSB        0
LB         1.00 Hz
GB         0
CB         1.40
PC         1.40
    
```

<sup>1</sup>H NMR Spectrum for Compound **3m** (20% DABCO/DCM)

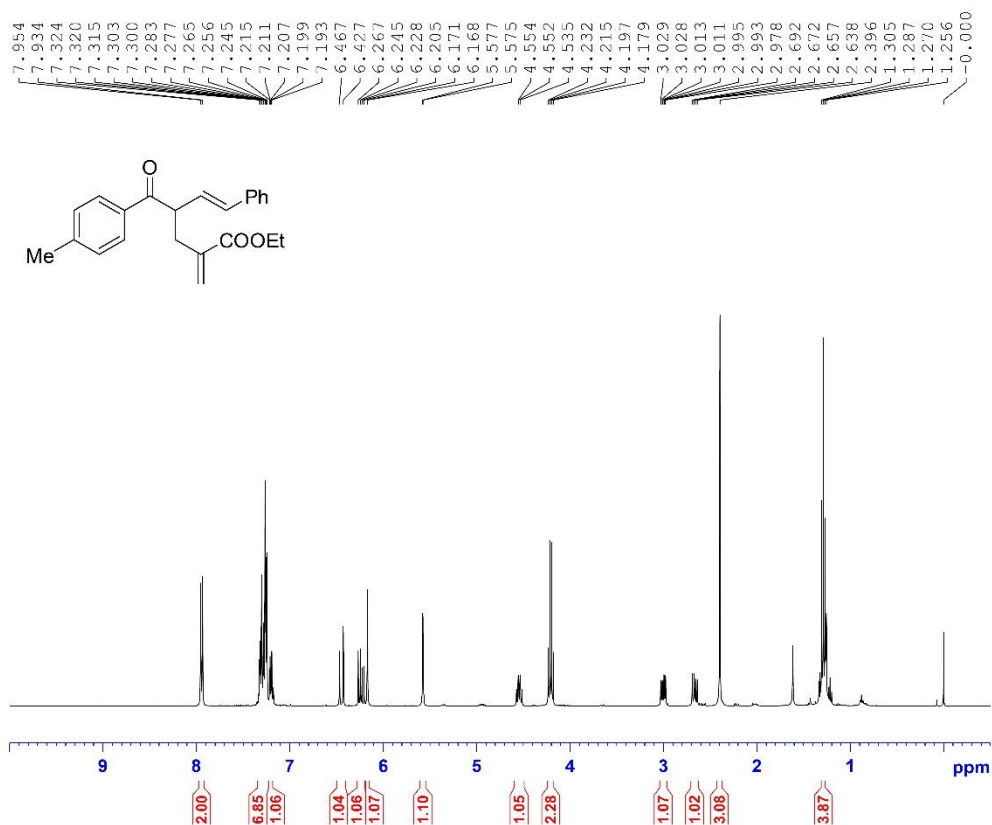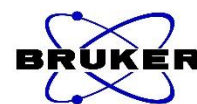

```

NAME      3m-H-20240702_1 (2)
EXPNO    1
PROCNO   1
Date_    20240702
Time     20.59 h
INSTRUM  Avance Neo 400
PROBHD   5116098 0847 (
PULPROG  zg30
TD        65536
SOLVENT  CDCl3
NS        8
DS        2
SWH       8196.722 Hz
FIDRES    0.250444 Hz
AQ        3.9977460 sec
RG         601
DW         61.000 usec
DE         13.34 usec
TE         298.1 K
D1         1.00000000 sec
TEC        1
SFO1      400.1824711 KHz
NUC1      1H
PC        3.33 usec
PI         10.00 usec
SI         65536
SF         400.1800000 KHz
WDW       EM
SSB        0
LB         0.30 Hz
GB         0
DC         1.00
    
```

<sup>1</sup>H NMR and <sup>13</sup>C NMR Spectra for Compound 3n

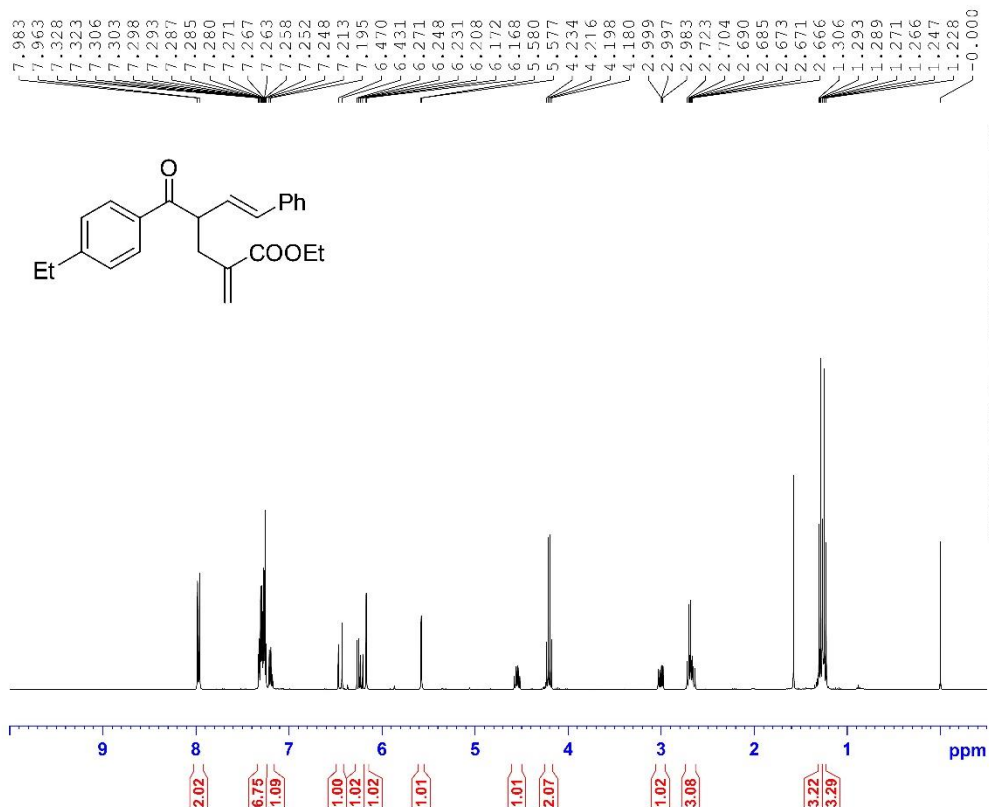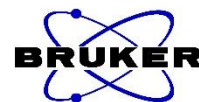

```

NAME      3-H-4'-Et
EXPNO     1
PROCNO    1
Date_     20220622
Time      15.35 h
INSTRUM   Avance Neo 400
PROBHD    Z116098_0847 (
PULPROG   zgpg30
TD         65536
SOLVENT   CDCl3
NS         512
DS         4
SWH        8138.722 Hz
FIDRES     0.250174 Hz
AQ         3.3971663 sec
RG         131
DW         61.000 usec
DE         13.54 usec
TE         298.1 K
D1         1.00000000 sec
D11        1
TD0        1
SFO1       400.1824711 MHz
NUC1       1H
P0         3.33 usec
PI         10.00 usec
SI         65536
SF         400.1800396 MHz
WDW        EM
SSB        0
LB         0.30 Hz
GB         0
PC         1.00
    
```

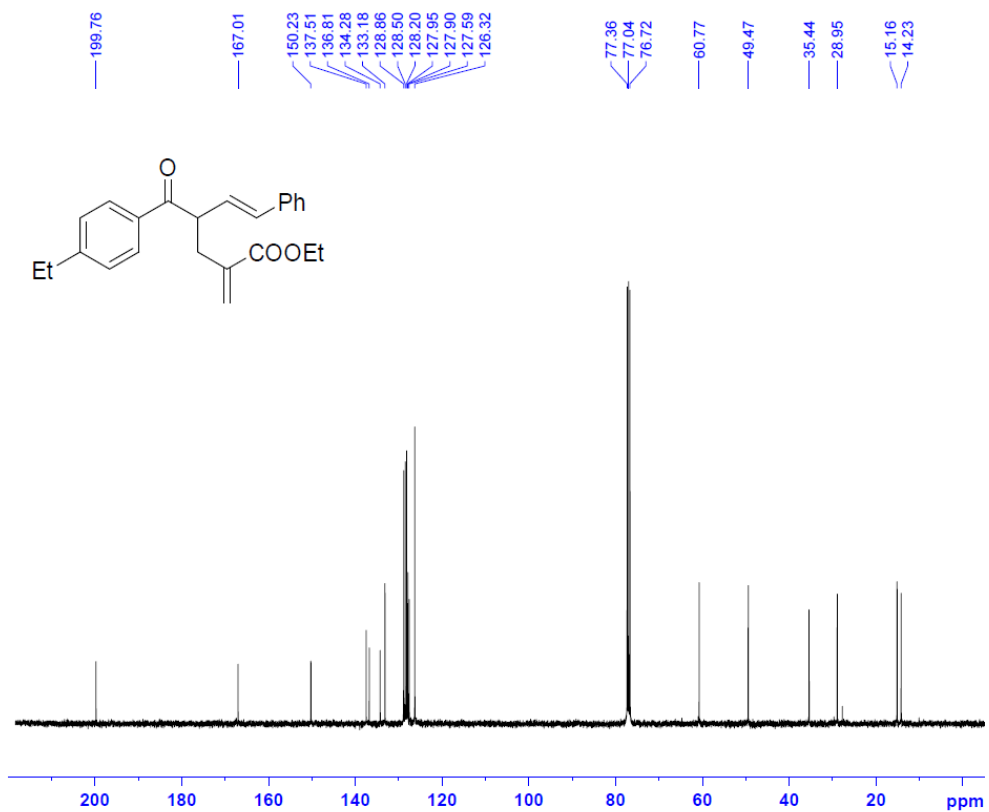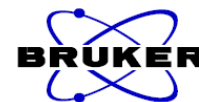

```

NAME      3-C-4'-Et
EXPNO     1
PROCNO    1
Date_     20220705
Time      5.00 h
INSTRUM   Avance Neo 400
PROBHD    Z116098_0847 (
PULPROG   zgpg30
TD         65536
SOLVENT   CDCl3
NS         512
DS         4
SWH        23809.523 Hz
FIDRES     0.726609 Hz
AQ         1.3763061 sec
RG         15.625
DW         21.000 usec
DE         6.50 usec
TE         298.2 K
D1         2.00000000 sec
D11        0.03000000 sec
TD0        1
SFO1       100.6354036 MHz
NUC1       13C
P0         3.33 usec
PI         10.00 usec
SI         32768
SF         100.6253410 MHz
WDW        EM
SSB        0
LB         1.00 Hz
GB         0
PC         1.40
    
```

<sup>1</sup>H NMR and <sup>13</sup>C NMR Spectra for Compound 3o

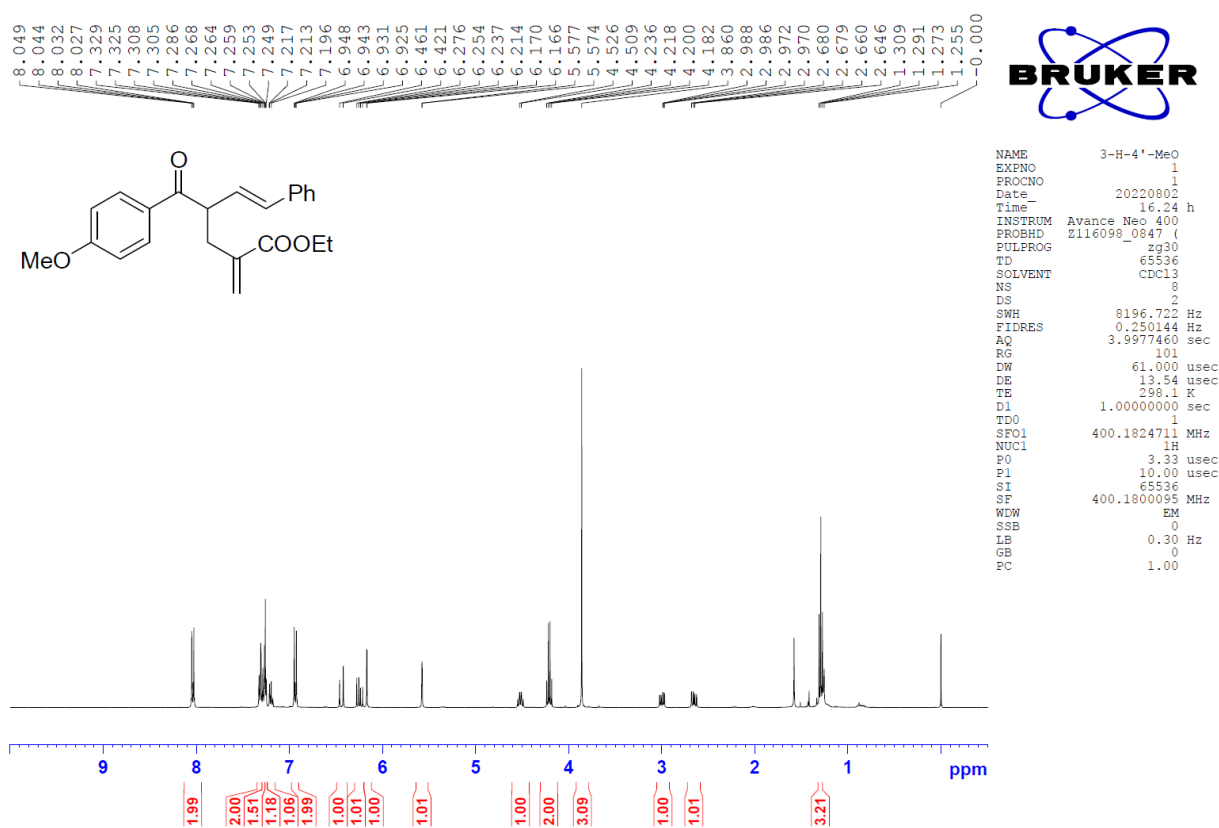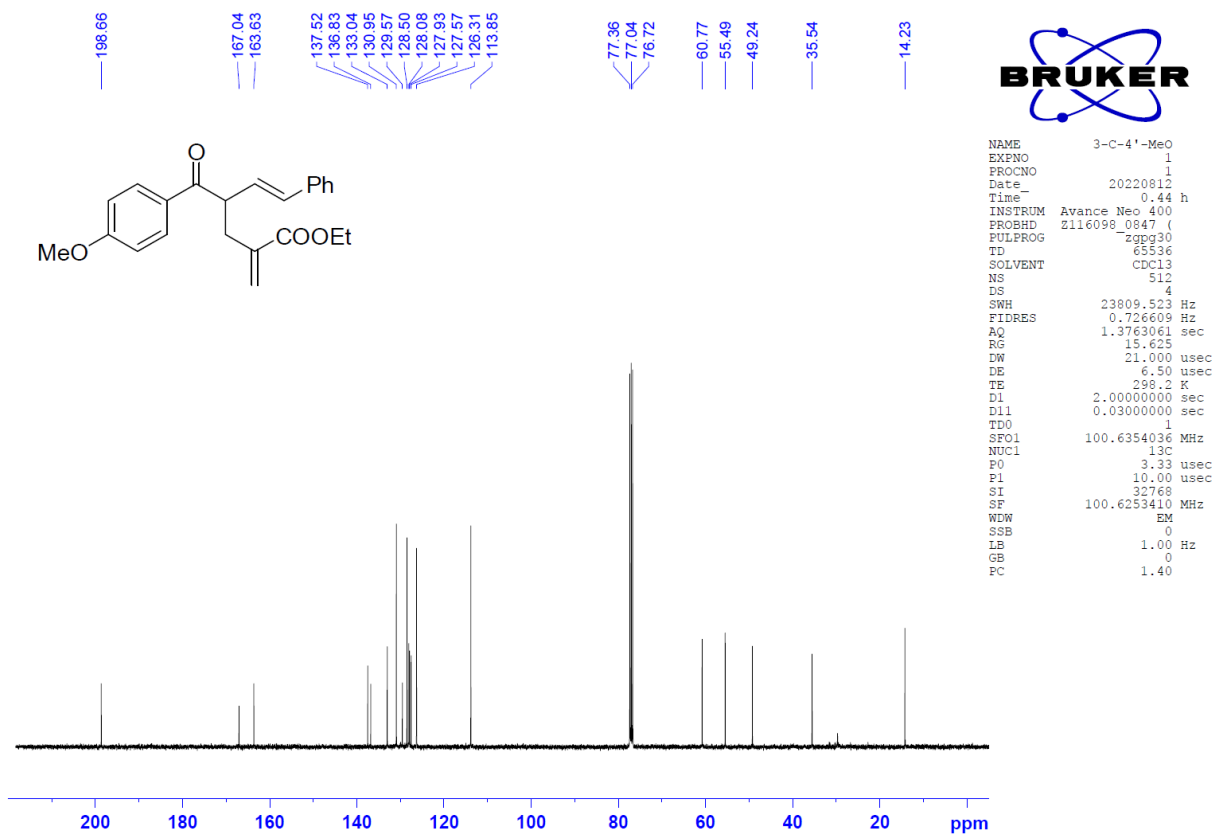



<sup>1</sup>H NMR, <sup>13</sup>C NMR and <sup>19</sup>F NMR Spectra for Compound 3p

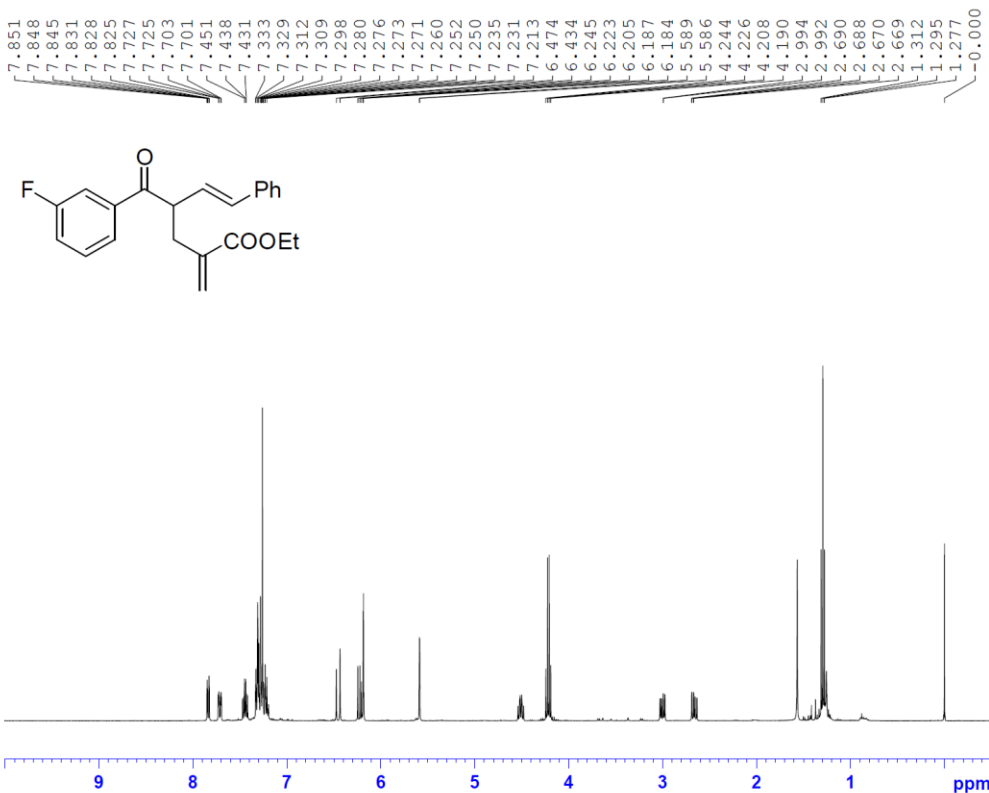

**BRUKER**

```

NAME      3-H-3'-F
EXPNO     1
PROCNO    1
Date_     20220802
Time      16.15 h
INSTRUM   Avance Neo 400
PROBHD    Z116098_0847 (
PULPROG   zg30
TD         65536
SOLVENT   CDCl3
NS         8
DS         2
SWH        8196.722 Hz
FIDRES     0.250144 Hz
AQ         3.9977460 sec
RG         101
DM         61.000 usec
DE         13.54 usec
TE         298.2 K
D1         1.00000000 sec
TDO        1
SFO1       400.1824711 MHz
NUC1       1H
P0         3.33 usec
P1         10.00 usec
SI         65536
SF         400.1800095 MHz
WDW        EM
SSB        0
LB         0.30 Hz
GB         0
PC         1.00
    
```

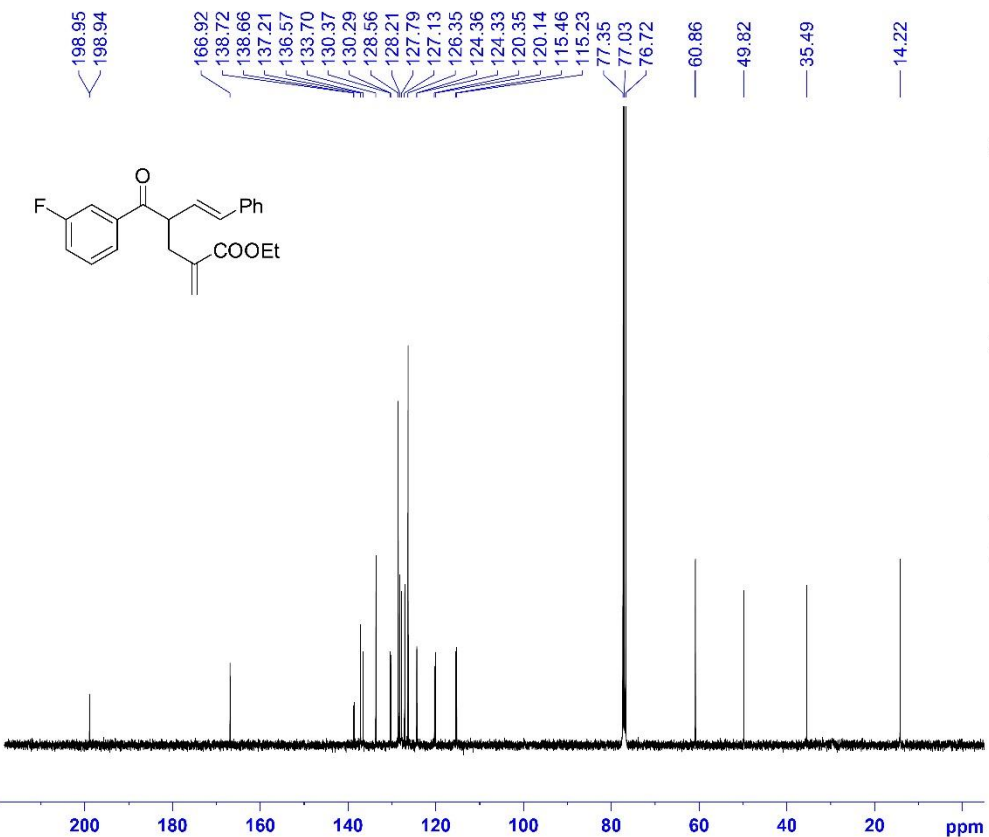

**BRUKER**

```

NAME      3p-C-3'-F
EXPNO     1
PROCNO    1
Date_     20220811
Time      23.37 h
INSTRUM   Avance Neo 400
PROBHD    Z116098_0847 (
PULPROG   zgpg30
TD         65536
SOLVENT   CDCl3
NS         512
DS         4
SWH        23809.573 Hz
FIDRES     0.726609 Hz
AQ         2.3763061 sec
RG         13.625
DM         21.000 usec
DE         6.50 usec
TE         298.1 K
D1         2.00000000 sec
T11        0.05000000 sec
T20        1
SFO1       100.6254036 MHz
NUC1       13C
P0         3.33 usec
P1         9.00 usec
SI         32768
SF         100.6253410 MHz
WDW        RM
SSB        0
LB         1.00 Hz
GB         0
PC         2.00
    
```

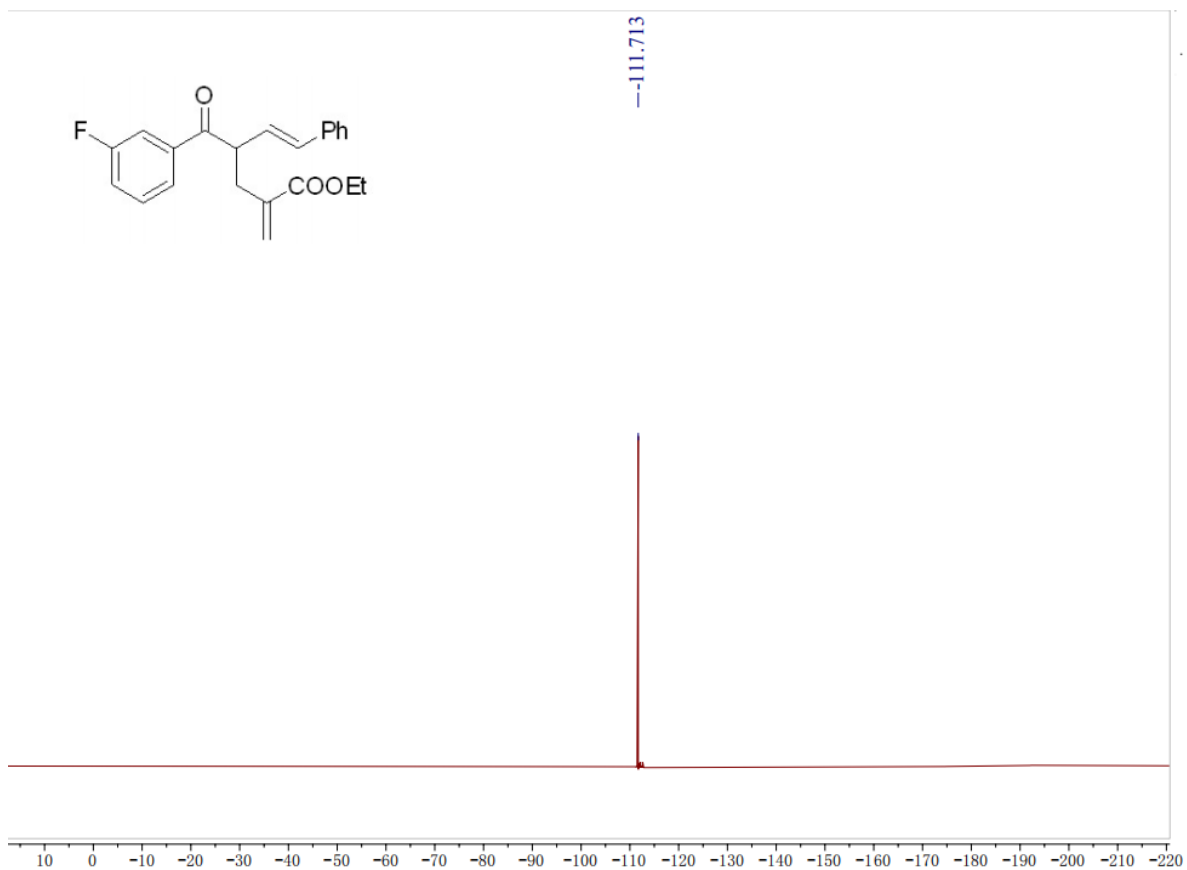

$^1\text{H}$  NMR Spectrum for Compound 3p (20% DABCO/DCM)

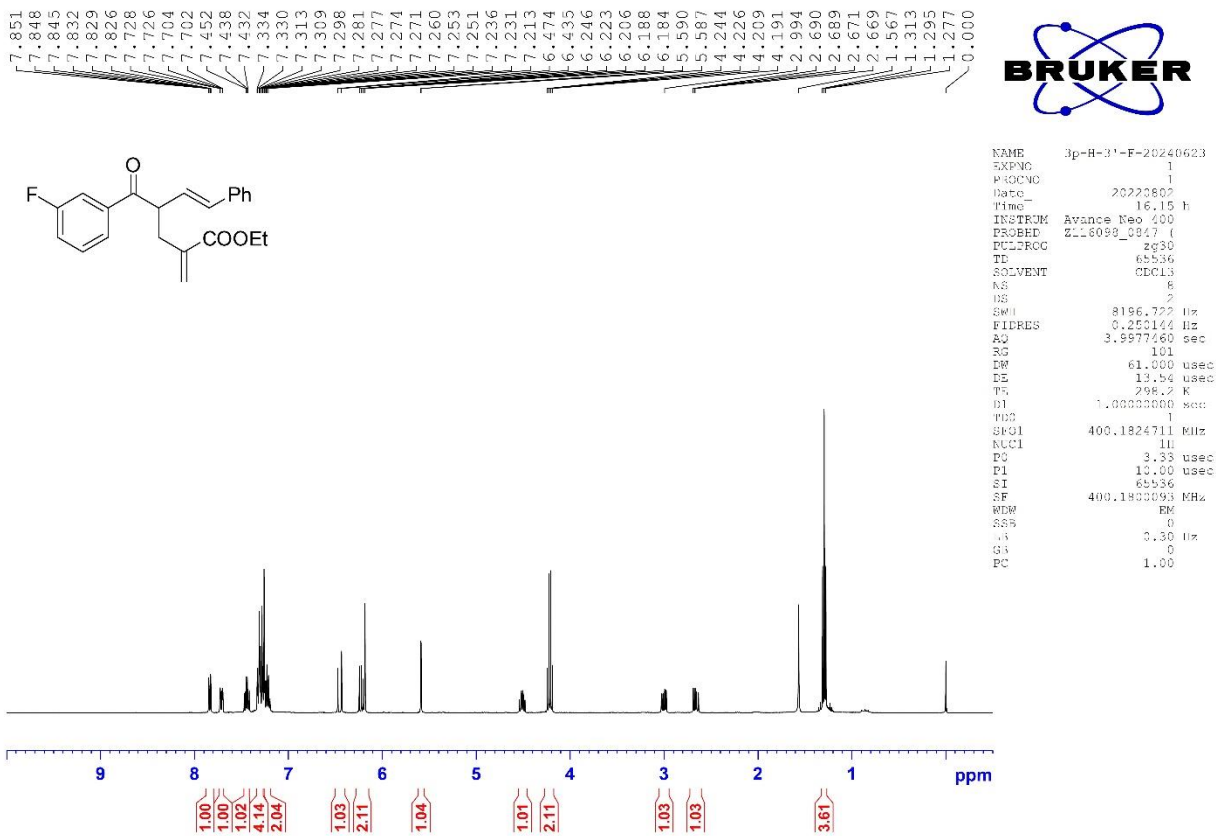

<sup>1</sup>H NMR and <sup>13</sup>C NMR Spectra for Compound 3q

7.999  
7.995  
7.990  
7.935  
7.931  
7.928  
7.915  
7.912  
7.909  
7.536  
7.533  
7.530  
7.518  
7.516  
7.513  
7.510  
7.426  
7.406  
7.386  
7.333  
7.329  
7.312  
7.309  
7.301  
7.299  
7.281  
7.277  
7.260  
7.236  
7.232  
7.214  
6.473  
6.434  
6.240  
6.217  
6.200  
6.187  
6.184  
6.178  
5.869  
5.586  
4.248  
4.230  
4.212  
4.195  
2.689  
1.315  
1.297  
1.279  
-0.000

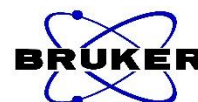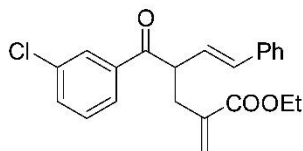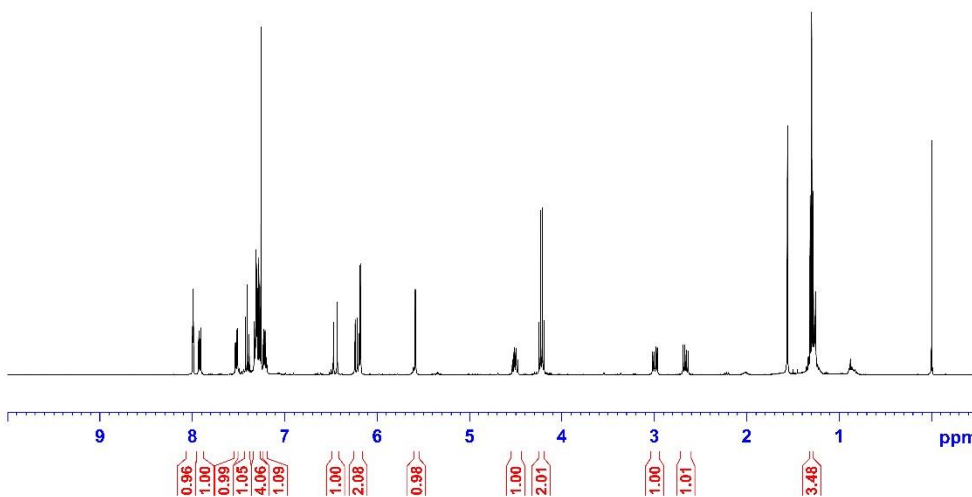

```

NAME      3-1-3'-C1
EXPNO    1
PROCNO   1
Date_    20220802
Time     16.20 h
INSTRUM  Avance Neo 400
PROBHD   Z116098_0847 (
PULPROG  zg30
TD        65536
SOLVENT  CDCl3
NS        8
DS        2
SWH       8196.722 Hz
FIDRES    0.250174 Hz
AQ        3.9977460 sec
RG         101
DW         61.600 usec
DE         3.54 usec
TE         298.1 K
D1         1.00000000 sec
H10        1
SFO1      400.1624711 MHz
NUC1      1H
PC         3.33 usec
PI         10.00 usec
SI         65536
SF         400.1600095 MHz
WDW        EM
SSB        0
LB         0.30 Hz
GB         0
PC         1.00
    
```

198.94  
166.91  
138.16  
137.18  
136.56  
135.05  
133.73  
133.14  
130.01  
128.66  
128.56  
128.24  
127.80  
127.07  
126.71  
126.35  
77.36  
77.04  
76.72  
60.87  
49.74  
35.50  
14.23

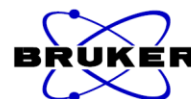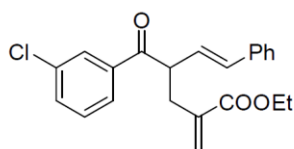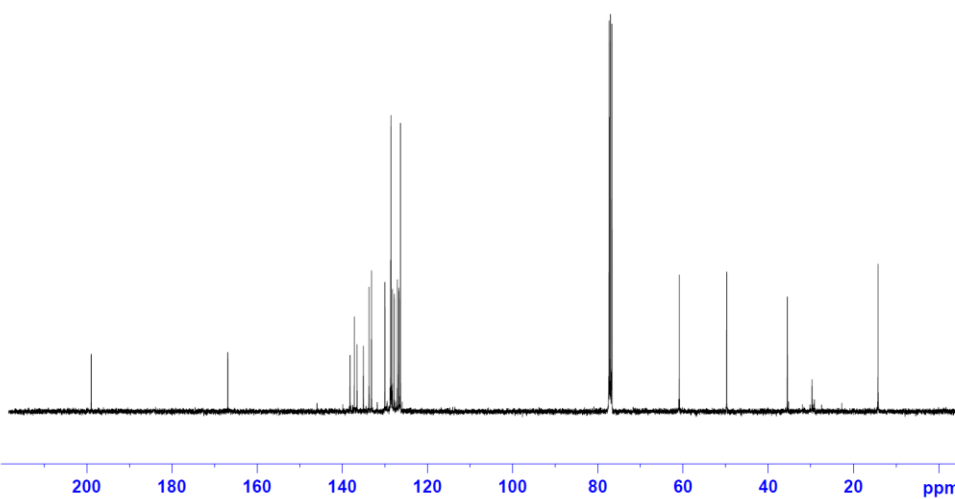

```

NAME      3-C-3'-C1
EXPNO    1
PROCNO   1
Date_    20220812
Time     0.11 h
INSTRUM  Avance Neo 400
PROBHD   Z116098_0847 (
PULPROG  zgpg30
TD        65536
SOLVENT  CDCl3
NS        4
DS        4
SWH       23809.523 Hz
FIDRES    0.726609 Hz
AQ        1.3763061 sec
RG         15.625
DW         21.000 usec
DE         6.50 usec
TE         298.2 K
D1         2.00000000 sec
D11        0.03000000 sec
TD0        1
SFO1      100.6354032 MHz
NUC1      13C
PC         3.33 usec
PI         10.00 usec
SI         32768
SF         100.6253410 MHz
WDW        EM
SSB        0
LB         1.00 Hz
GB         0
PC         1.40
    
```

<sup>1</sup>H NMR and <sup>13</sup>C NMR Spectra for Compound 3r

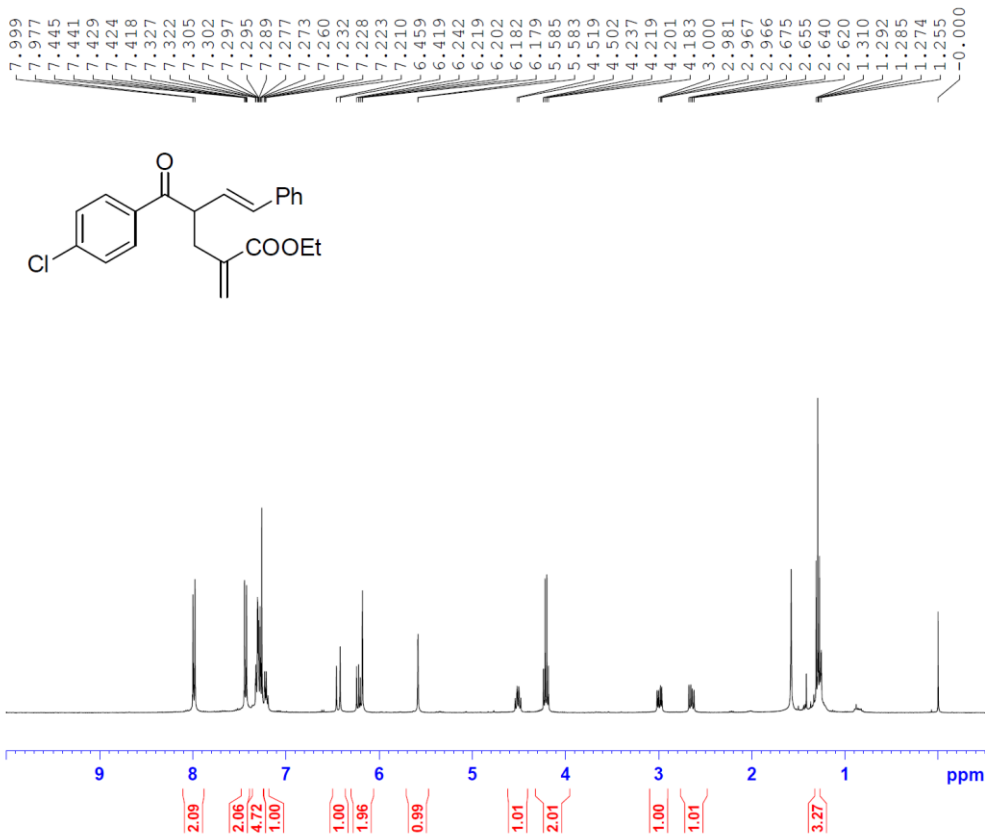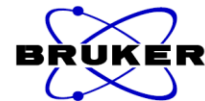

```

NAME      3-H-4'-Cl
EXPNO    1
PROCNO   1
Date_    20220704
Time     16.17 h
INSTRUM  Avance Neo 400
PROBHD   Z116098_0847 (
PULPROG  zg30
TD        65536
SOLVENT  CDCl3
NS        8
DS        2
SWH       8196.722 Hz
FIDRES    0.250144 Hz
AQ        3.9977460 sec
RG        101
DW        61.000 usec
DE        13.54 usec
TE        298.1 K
D1        1.00000000 sec
TDO       1
SFO1     400.1824711 MHz
NUC1      1H
P0        3.33 usec
P1        10.00 usec
SI        65536
SF        400.1800092 MHz
WDW       EM
SSB       0
LB        0.30 Hz
GB        0
PC        1.00
    
```

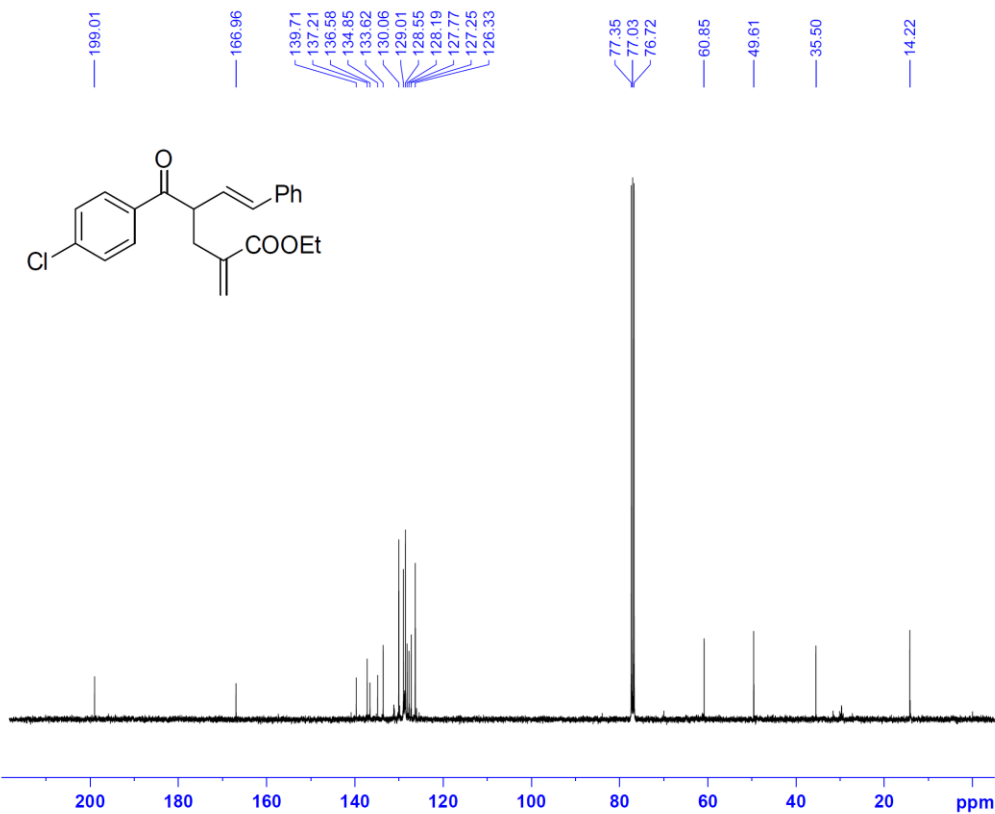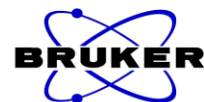

```

NAME      3-C-4'-Cl
EXPNO    1
PROCNO   1
Date_    20220715
Time     22.29 h
INSTRUM  Avance Neo 400
PROBHD   Z116098_0847 (
PULPROG  zgpg30
TD        65536
SOLVENT  CDCl3
NS        512
DS        4
SWH       23809.523 Hz
FIDRES    0.726609 Hz
AQ        1.3763061 sec
RG        15.625
DW        21.000 usec
DE        6.50 usec
TE        298.2 K
D1        2.00000000 sec
D11       0.03000000 sec
TDO       1
SFO1     100.6354036 MHz
NUC1      13C
P0        3.33 usec
P1        10.00 usec
SI        32768
SF        100.6253410 MHz
WDW       EM
SSB       1.00 Hz
LB        0
GB        0
PC        1.40
    
```

<sup>1</sup>H NMR and <sup>13</sup>C NMR Spectra for Compound **3s**

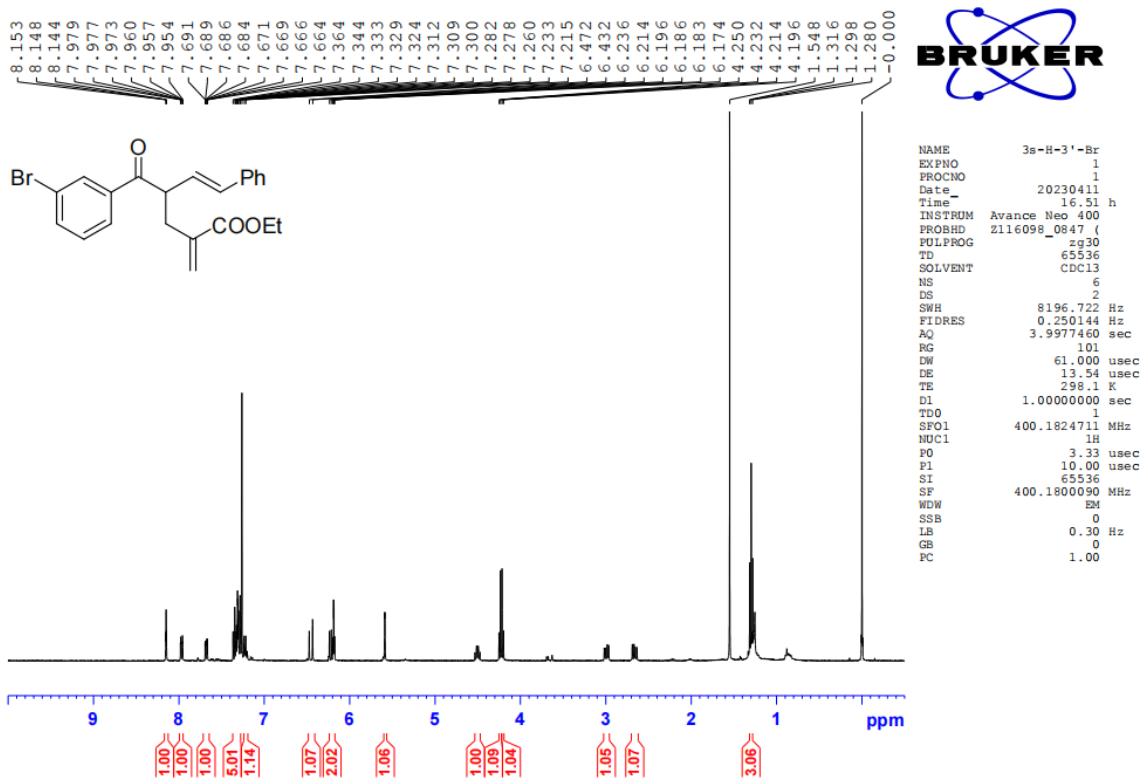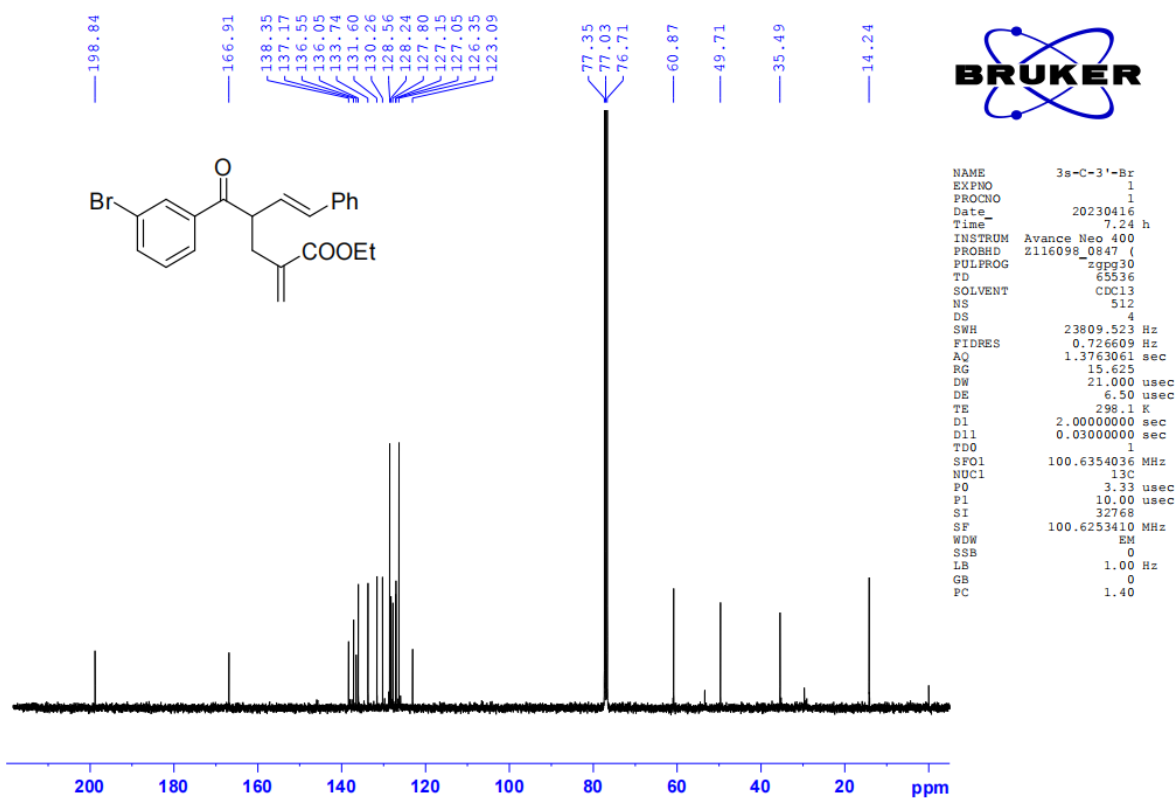

<sup>1</sup>H NMR, <sup>13</sup>C NMR and <sup>19</sup>F NMR Spectra for Compound 3t

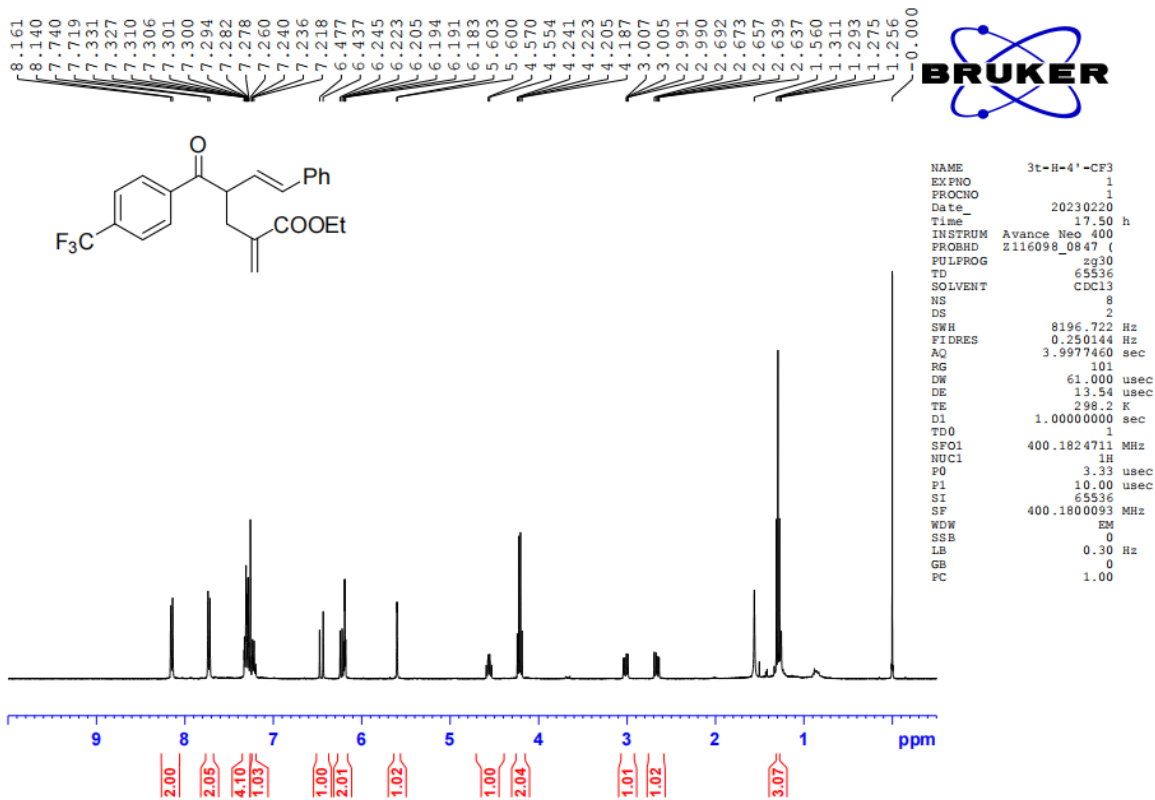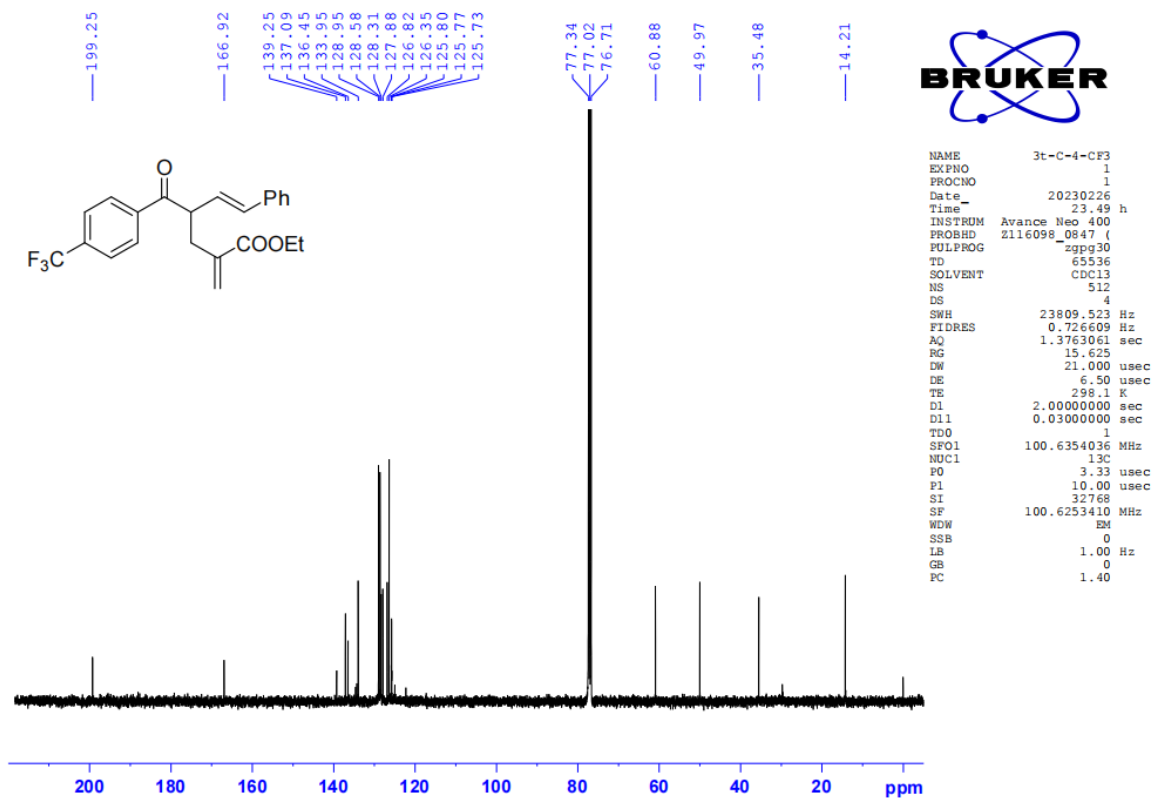

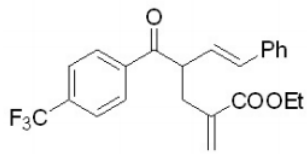

--63.165

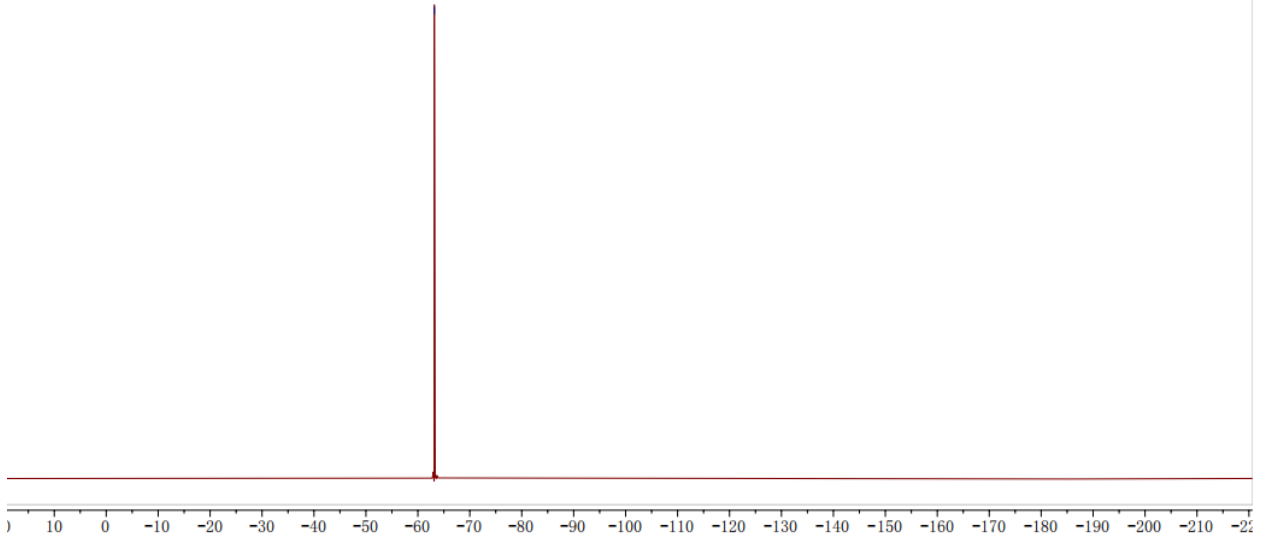

<sup>1</sup>H NMR and <sup>13</sup>C NMR Spectra for Compound 5a

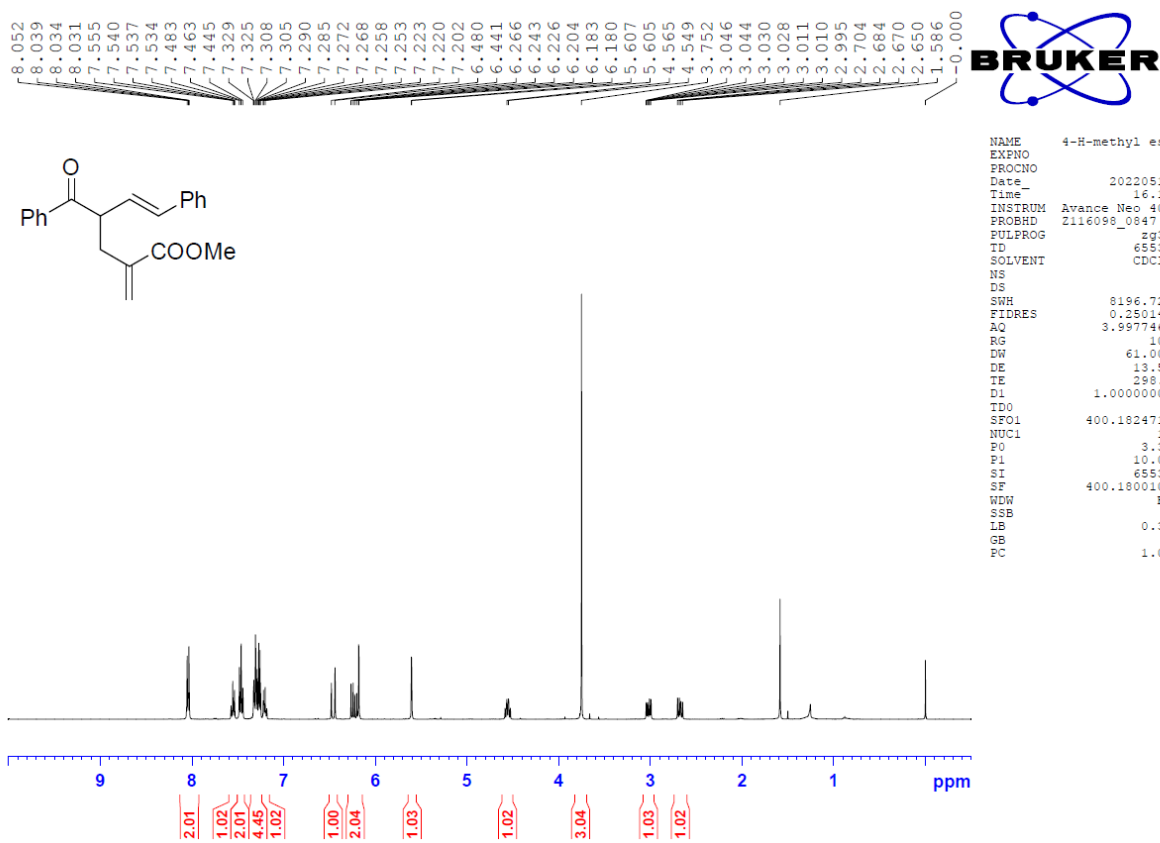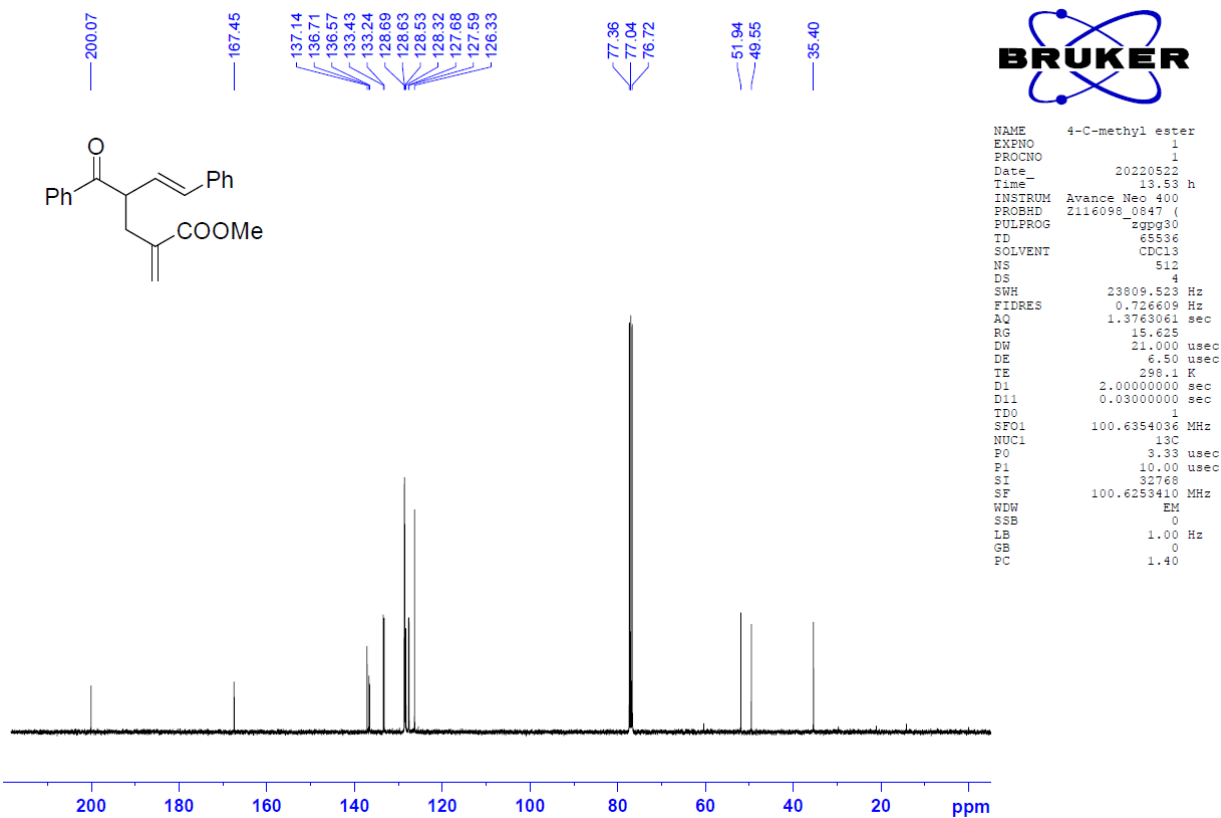



<sup>1</sup>H NMR and <sup>13</sup>C NMR Spectra for Compound 5b

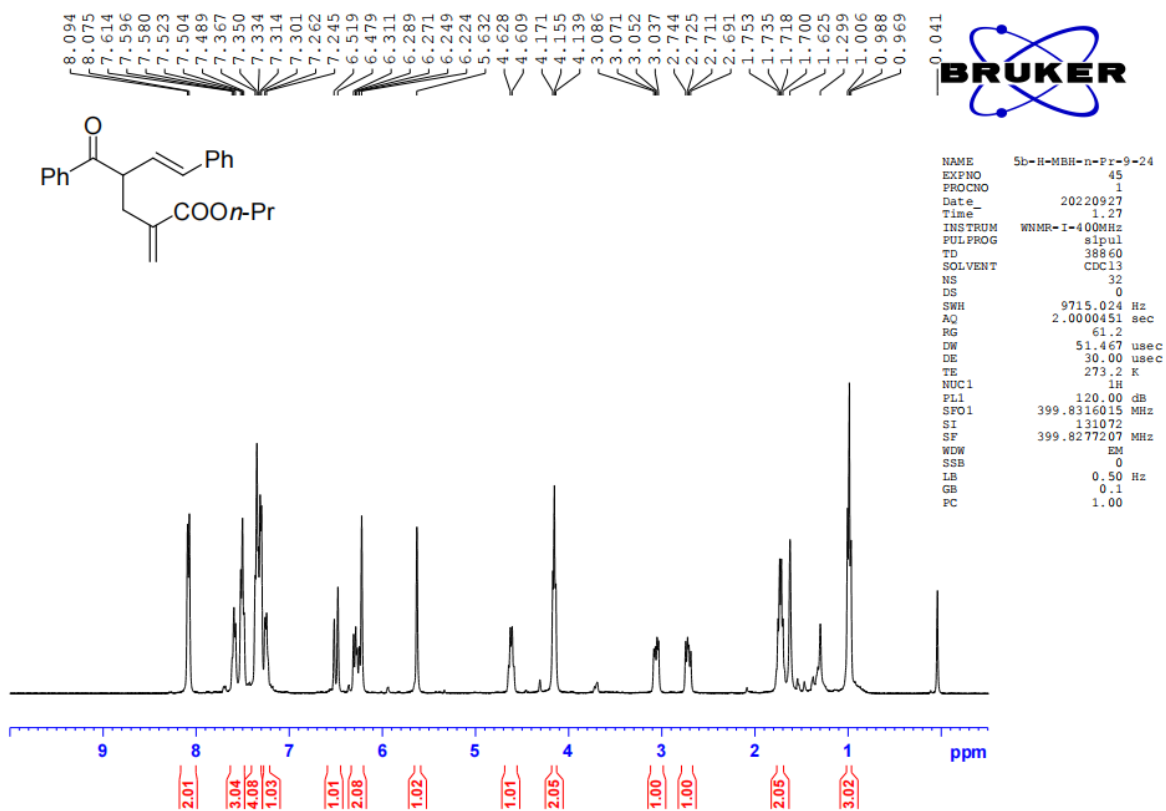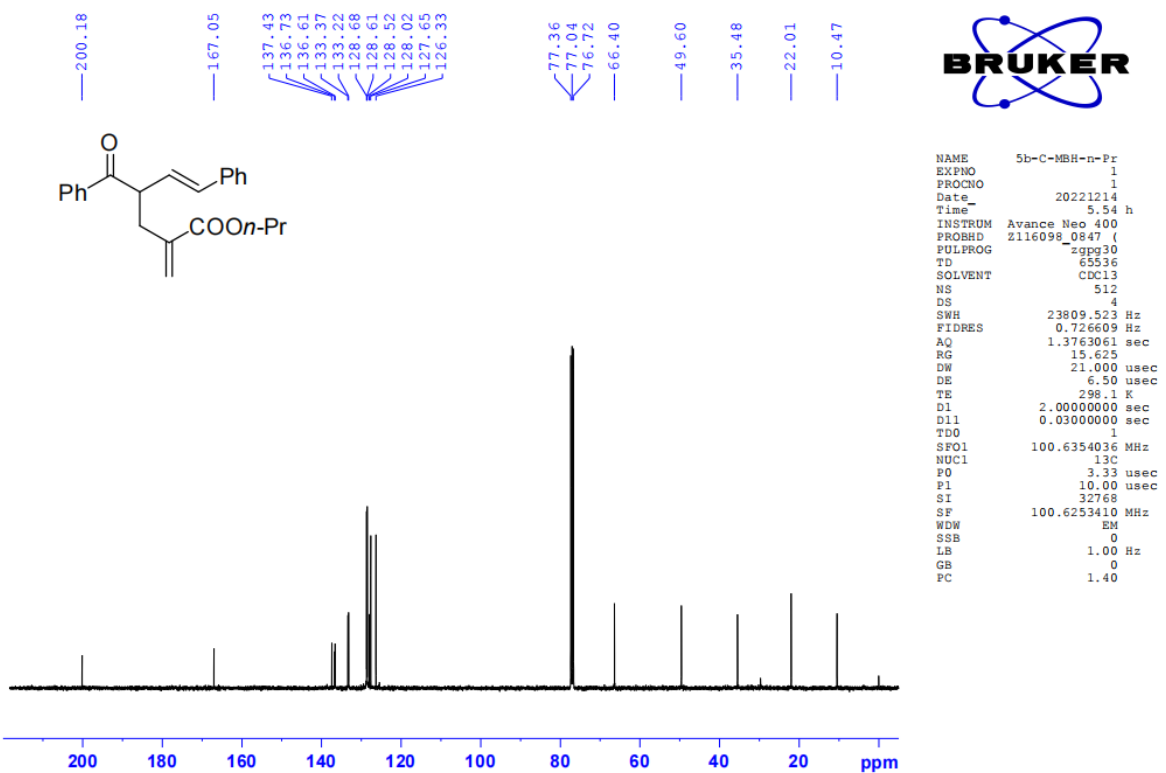

<sup>1</sup>H NMR and <sup>13</sup>C NMR Spectra for Compound 5c

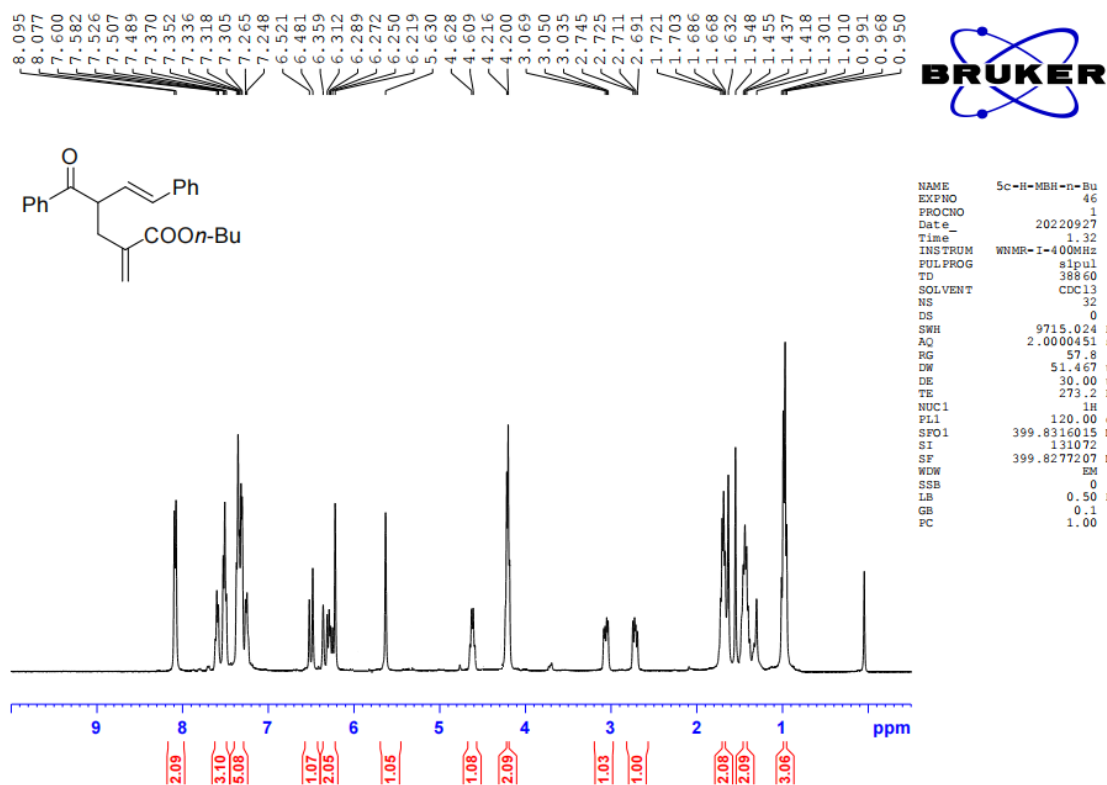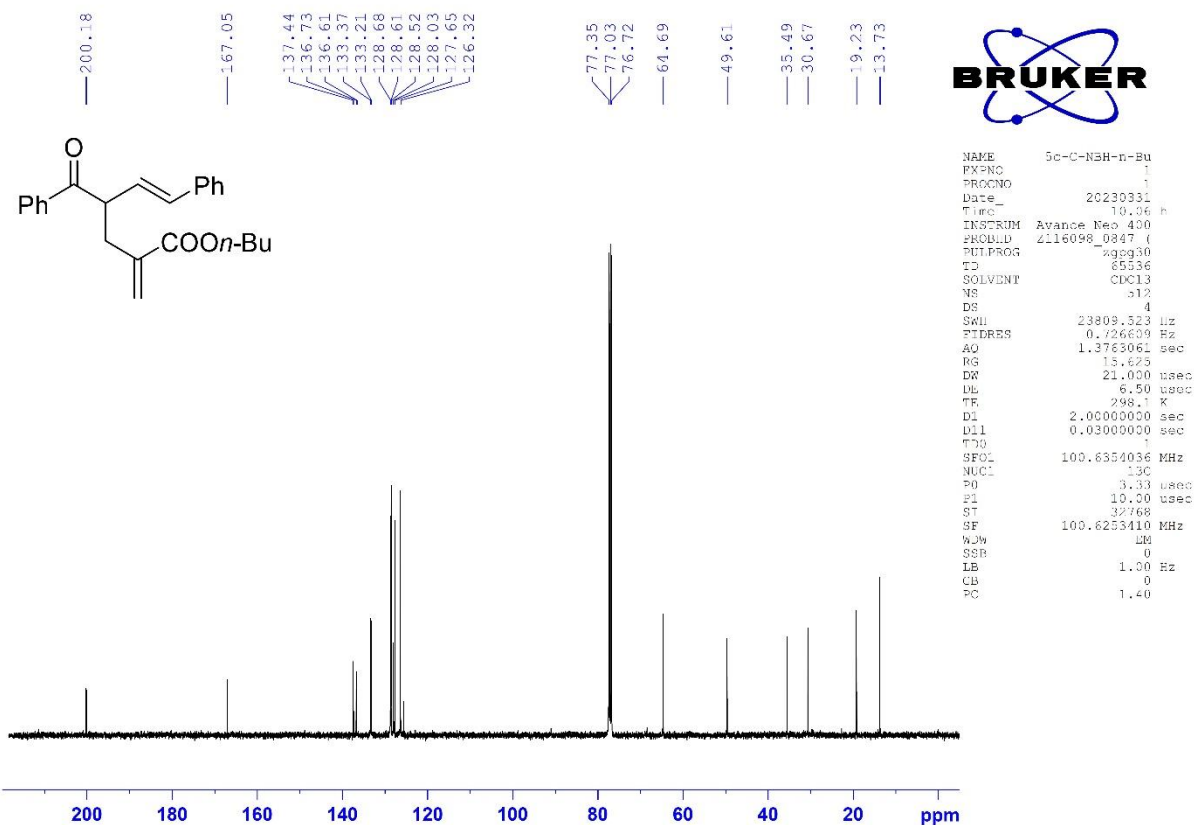

<sup>1</sup>H NMR and <sup>13</sup>C NMR Spectra for Compound 5d

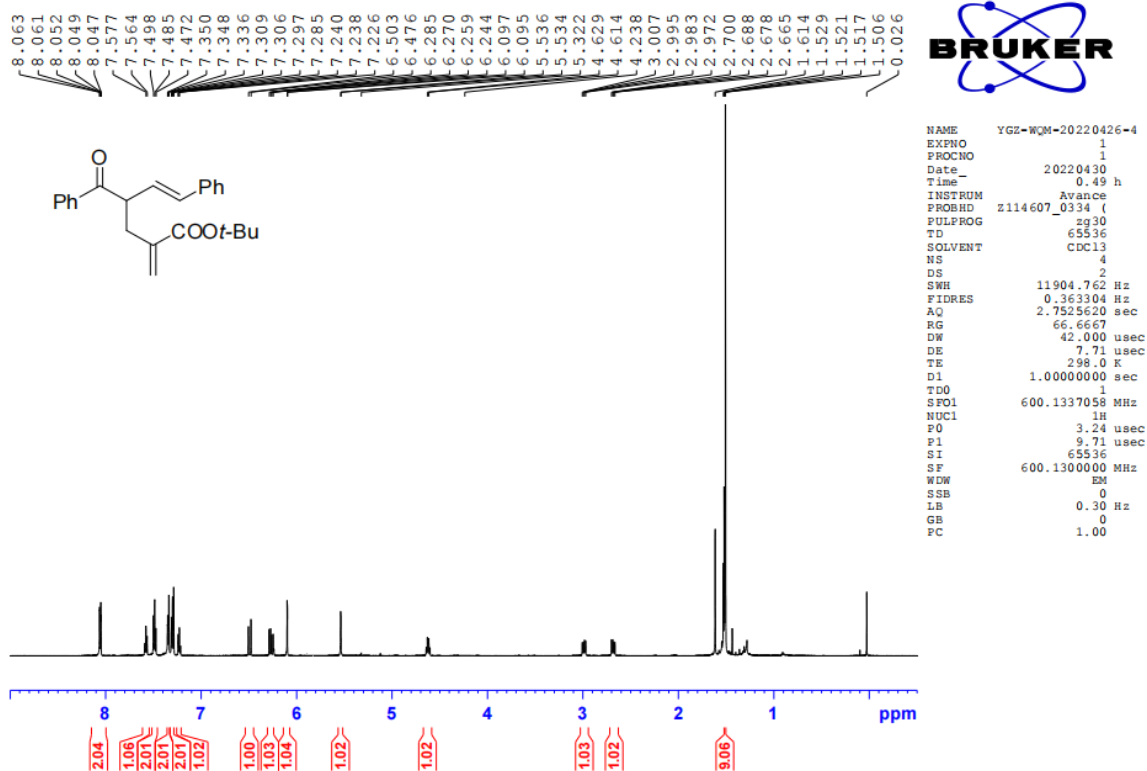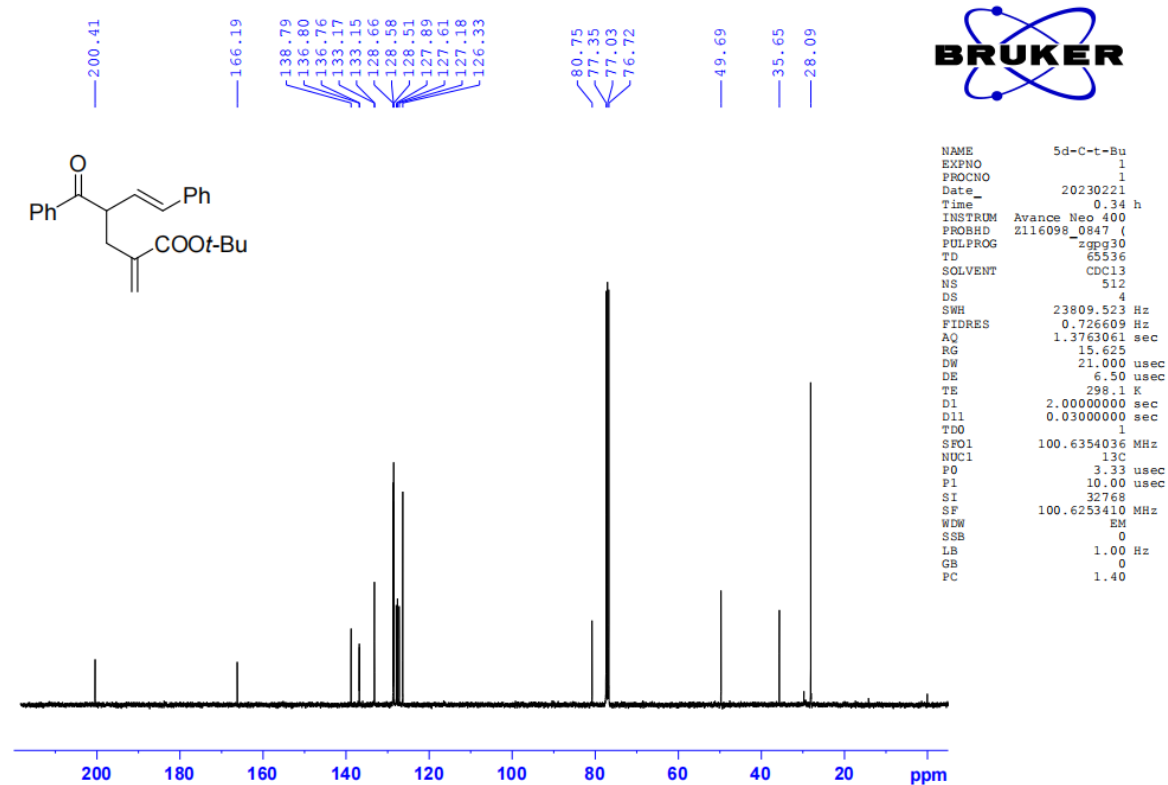

<sup>1</sup>H NMR and <sup>13</sup>C NMR Spectra for Compound 5e

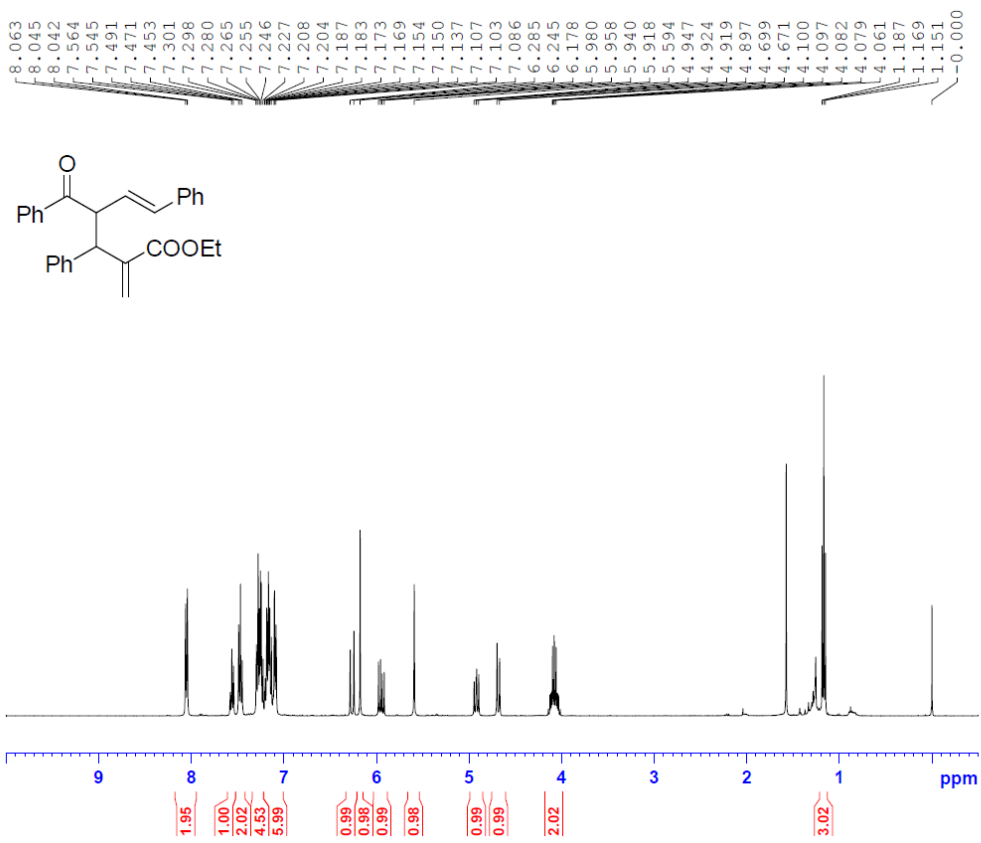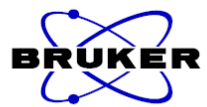

```

NAME      4-H-MBH-phenyl
EXPNO    1
PROCNO   1
Date_    20220510
Time     16.23 h
INSTRUM  Avance Neo 400
PROBHD   Z116098_0847 (
PULPROG  zg30
TD        65536
SOLVENT  CDCl3
NS        8
DS        2
SWH       8196.722 Hz
FIDRES    0.250144 Hz
AQ        3.9977460 sec
RG        101
DW        61.000 usec
DE        13.54 usec
TE        298.2 K
D1        1.00000000 sec
TD0       1
SF01     400.1824711 MHz
NUC1      1H
P0        3.33 usec
F1        10.00 usec
SI        65536
SF        400.1800110 MHz
WDW       EM
SSB       0
LB        0.30 Hz
GB        0
PC        1.00
    
```

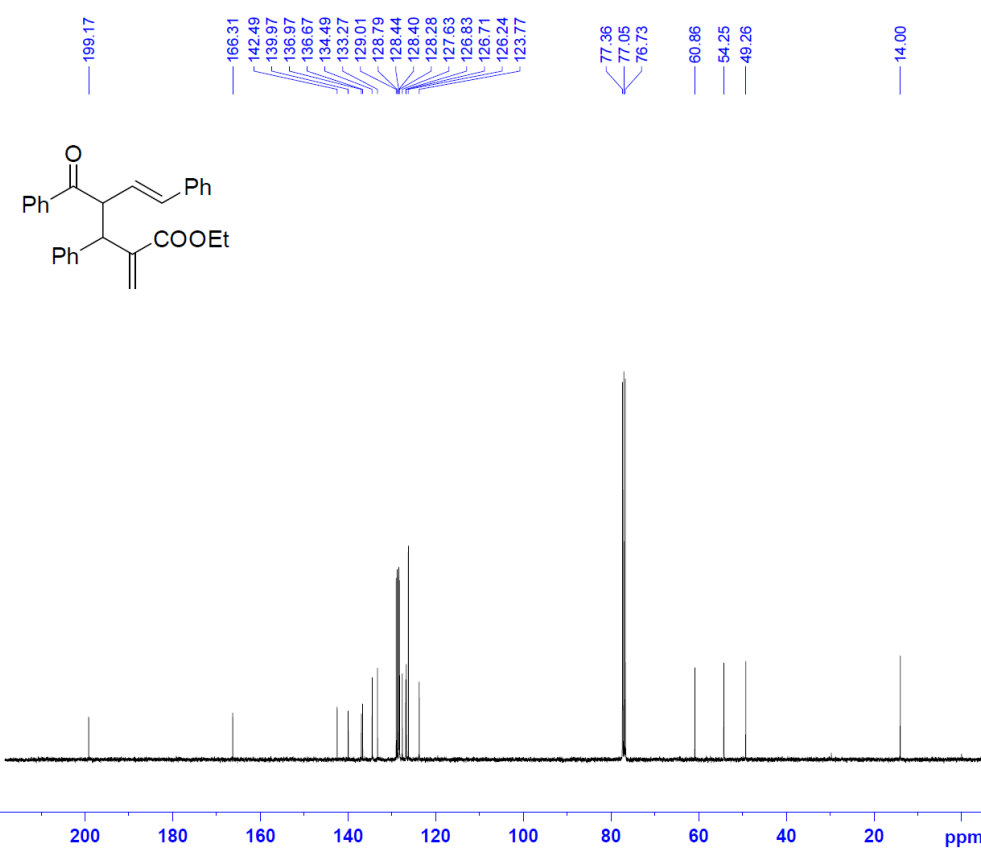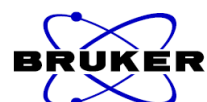

```

NAME      4-C-MBH-phenyl
EXPNO    1
PROCNO   1
Date_    20220522
Time     14.26 h
INSTRUM  Avance Neo 400
PROBHD   Z116098_0847 (
PULPROG  zgpg30
TD        65536
SOLVENT  CDCl3
NS        512
DS        4
SWH       23809.523 Hz
FIDRES    0.726609 Hz
AQ        1.3763061 sec
RG        15.625
DW        21.000 usec
DE        6.50 usec
TE        298.1 K
D1        2.00000000 sec
D11       0.03000000 sec
TD0       1
SF01     100.6354036 MHz
NUC1      13C
P0        3.33 usec
F1        10.00 usec
SI        32768
SF        100.6253410 MHz
WDW       EM
SSB       0
LB        1.00 Hz
GB        0
PC        1.40
    
```

<sup>1</sup>H NMR and <sup>13</sup>C NMR Spectra for Compound 5f

8.053  
8.035  
8.031  
7.566  
7.548  
7.490  
7.470  
7.452  
7.273  
7.268  
7.256  
7.243  
7.223  
7.207  
7.202  
7.186  
7.167  
7.156  
7.151  
7.139  
7.129  
7.120  
7.062  
7.058  
7.041  
6.211  
6.181  
6.141  
5.954  
5.933  
5.914  
5.893  
5.526  
5.524  
5.028  
5.000  
4.818  
4.796  
4.790  
4.769  
4.083  
4.065  
4.046  
4.037  
4.028  
2.432  
1.176  
1.158  
1.140  
0.000

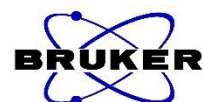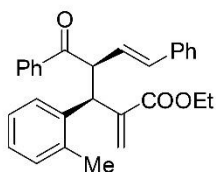

```

NAME      5f-H-20240623
EXPNO     1
PROCNO    1
Date_     20240624
Time      17.11 h
INSTRUM   Avance Neo 400
PROBHD    Z11609H_0847 (
PULPROG   zg30
TD         65536
SOLVENT   CDCl3
NS         8
DS         2
SWH        8196.722 Hz
FIDRES    0.250144 Hz
AQ         3.9977460 sec
RG         01
DM         61.000 usec
DE         13.54 usec
TE         298.2 K
D1         1.0000000 sec
TDO       1
SFO1      400.1624711 MHz
NUC1       1H
PC         3.33 usec
P1         10.00 usec
SI         65536
SF         400.1600008 MHz
WDW        EM
SSB        0
LB         0.30 Hz
GB         0
PC         1.00
    
```

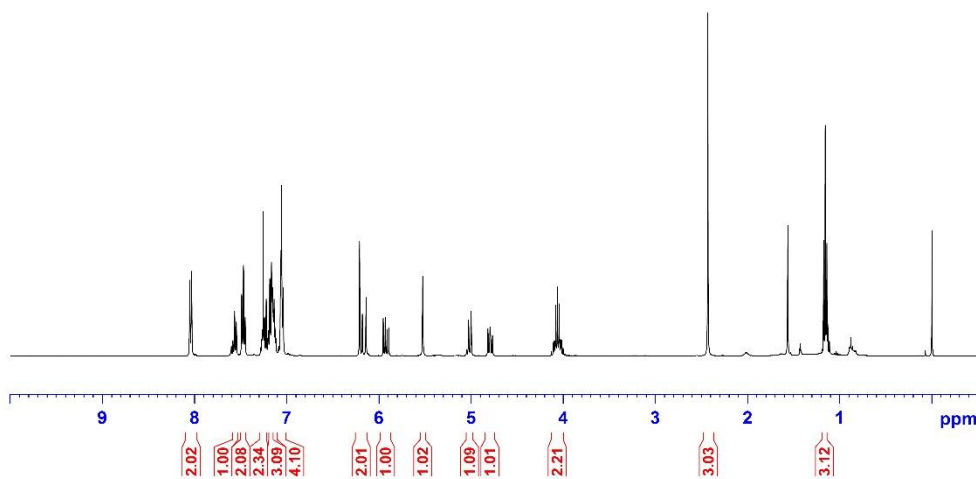

199.41  
166.39  
142.73  
138.27  
137.37  
136.99  
136.65  
134.30  
133.29  
130.42  
128.81  
128.43  
128.40  
127.61  
127.33  
126.58  
126.17  
125.88  
123.67  
77.35  
77.04  
76.72  
60.86  
55.23  
43.68  
20.12  
13.99

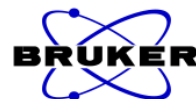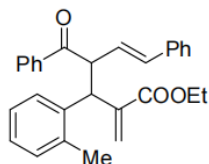

```

NAME      5f-C-MBR-2''-Me
EXPNO     1
PROCNO    1
Date_     20221103
Time      0.41 h
INSTRUM   Avance Neo 400
PROBHD    Z11609H_0847 (
PULPROG   zgpg30
TD         65536
SOLVENT   CDCl3
NS         512
DS         4
SWH        23809.523 Hz
FIDRES    0.726609 Hz
AQ         1.3763061 sec
RG         15.625
DM         21.000 usec
DE         6.50 usec
TE         298.1 K
D1         2.0000000 sec
D11        0.0300000 sec
TDO       1
SFO1      100.6354036 MHz
NUC1       13C
PC         3.33 usec
P1         10.00 usec
SI         32768
SF         100.6253410 MHz
WDW        EM
SSB        0
LB         1.00 Hz
GB         0
PC         1.40
    
```

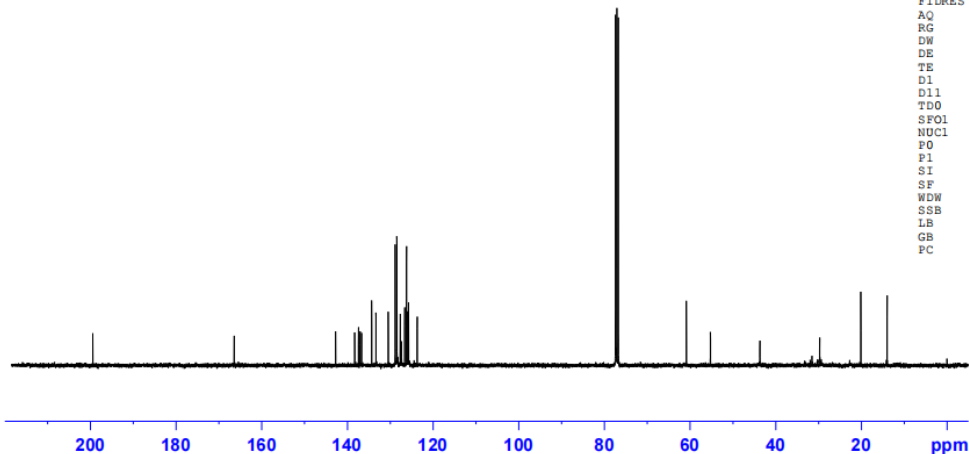

<sup>1</sup>H NMR and <sup>13</sup>C NMR Spectra for Compound 5g

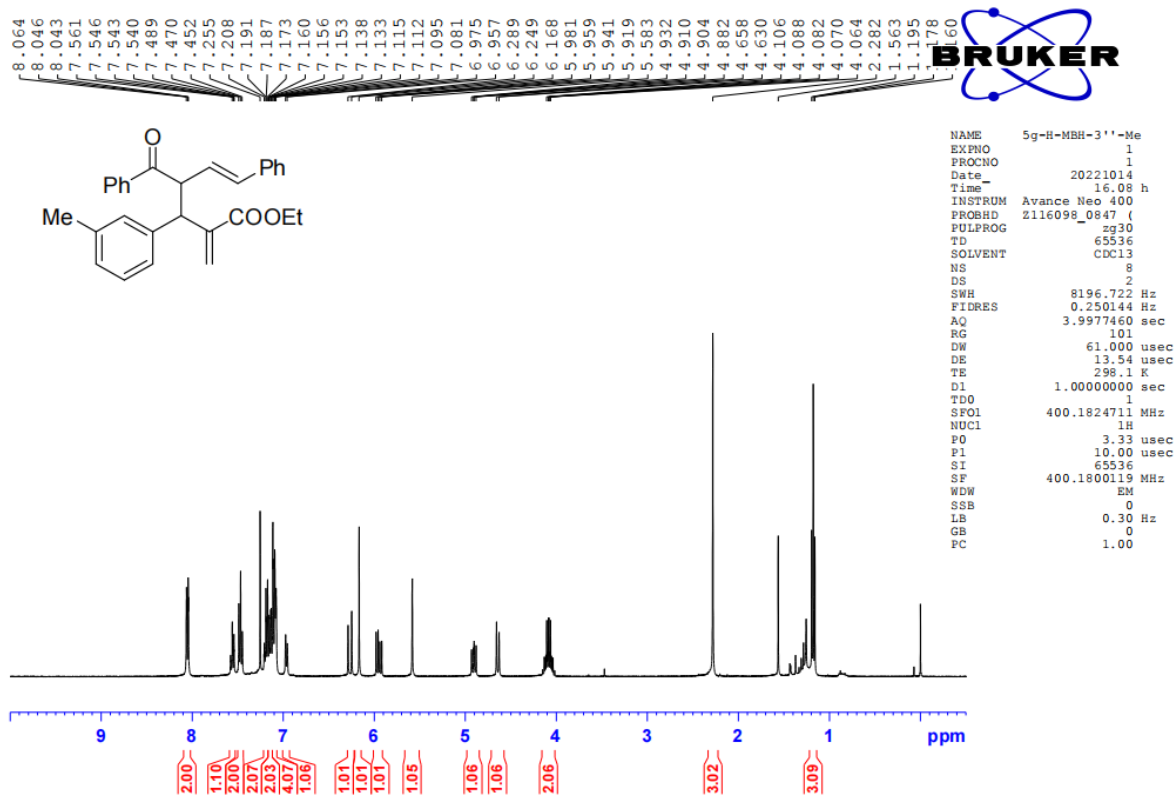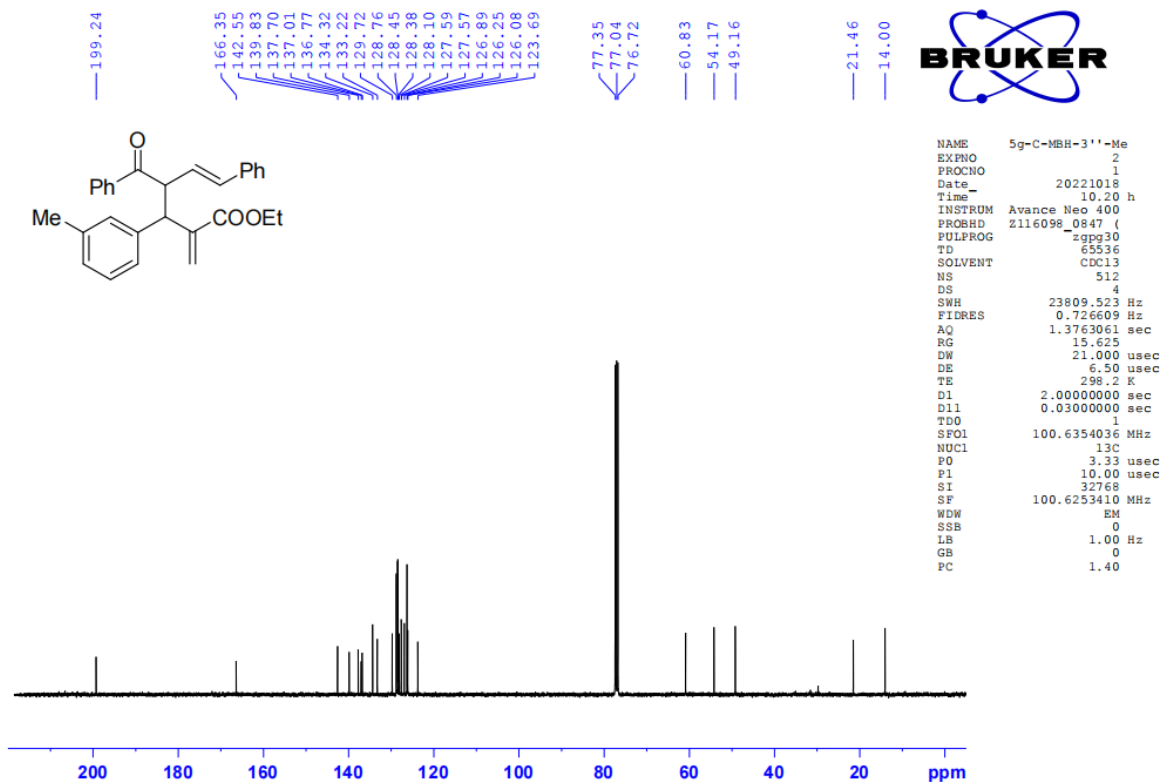

<sup>1</sup>H NMR and <sup>13</sup>C NMR Spectra for Compound 5h

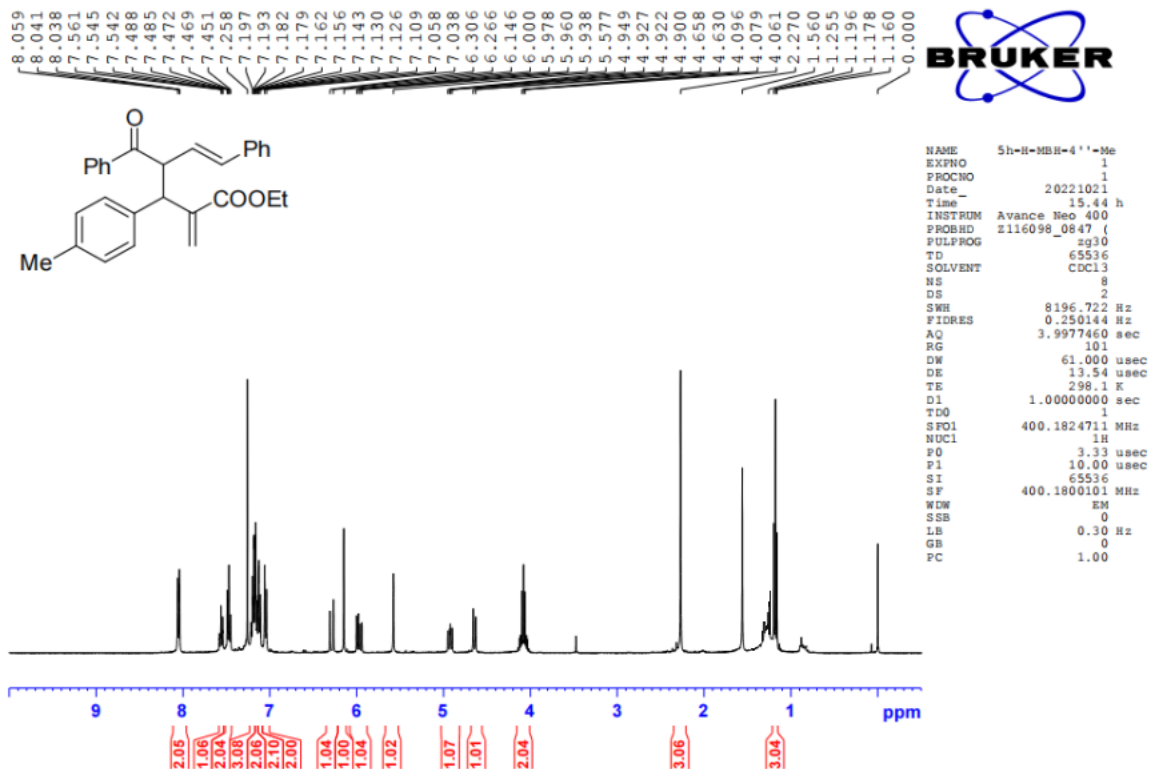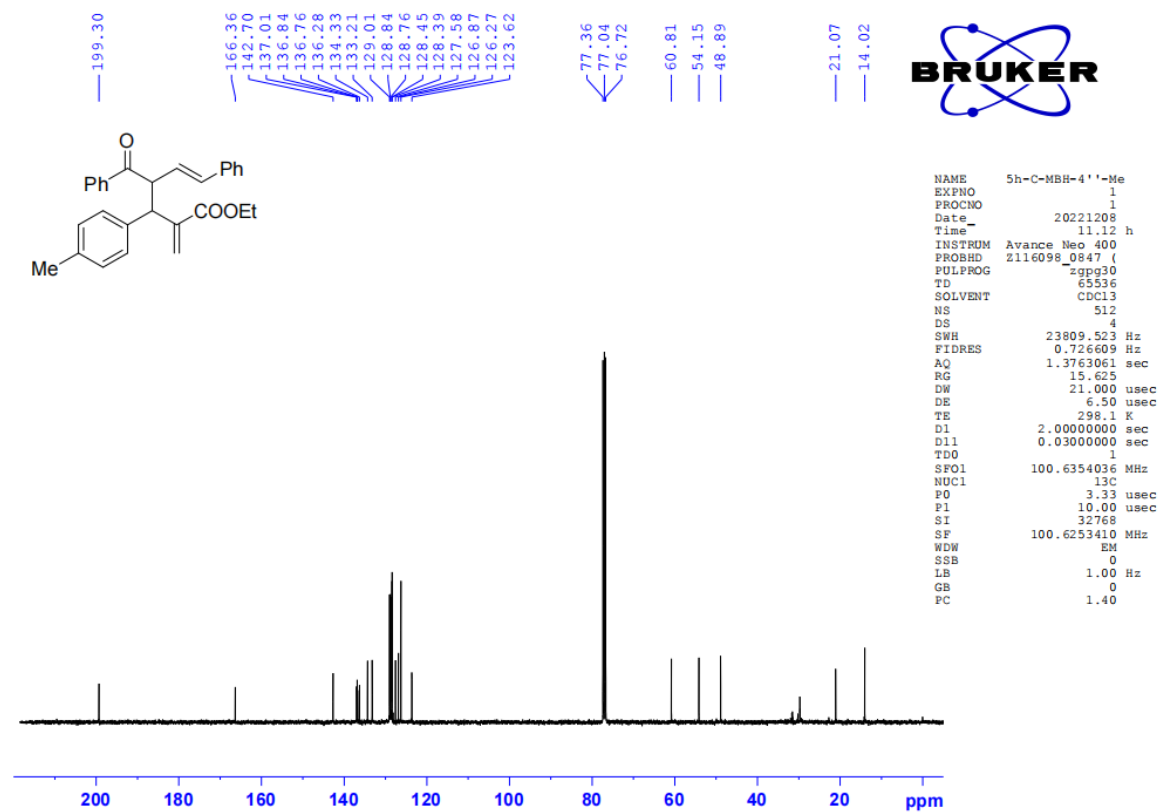

<sup>1</sup>H NMR, <sup>13</sup>C NMR and <sup>19</sup>F NMR Spectra for Compound 5i

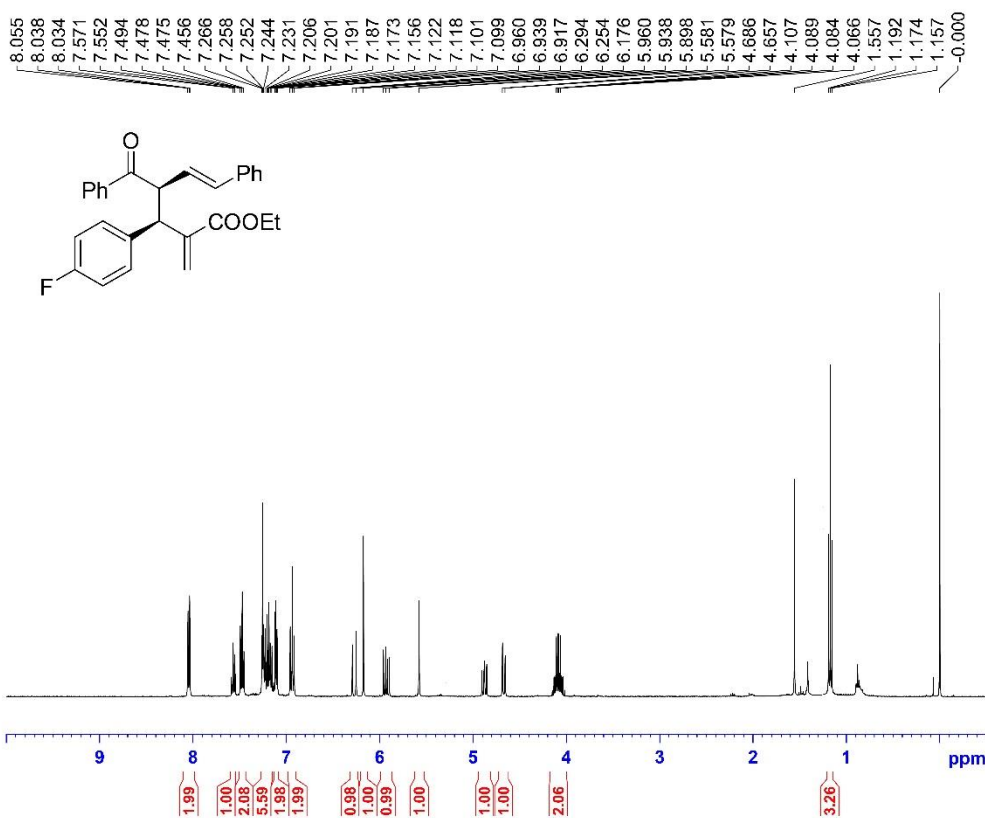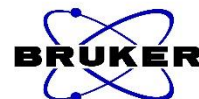

```

NAME      5i-1-17-D
EXPNO     1
PROCNO    1
Date_     20221231
Time      14.47 h
INSTRUM   Avance Neo 400
PROBHD    Z116098_08/7 (
PULPROG   zg30
TE        300.2
SOLVENT   CDCl3
NS        8
DS        2
SWH       8196.722 Hz
FIDRES    0.250144 Hz
AQ        3.9977460 sec
RG        101
OR        61.000 usec
PR        13.54 usec
PC        298.2 K
D1        1.00000000 sec
D11       0
SFO1      400.1824711 MHz
NUC1      1H
PQ        3.33 usec
PT        10.00 usec
SI        65536
SF        400.1800102 MHz
WDW       EM
SSB       0
LB        0.30 Hz
GB        0
PC        1.00
    
```

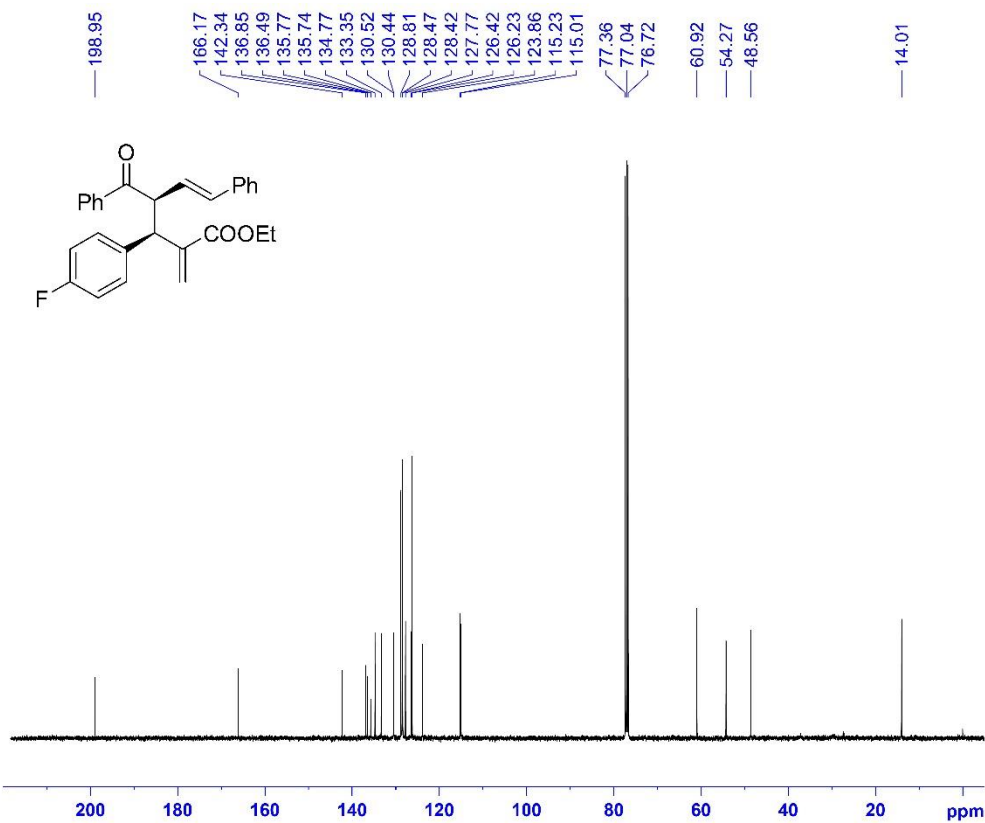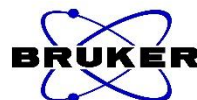

```

NAME      5i-C-41-F
EXPNO     1
PROCNO    1
Date_     20230110
Time      20.40 a
INSTRUM   Avance Neo 400
PROBHD    Z116098_08/7 (
PULPROG   zgpg30
TE        300.2
SOLVENT   CDCl3
NS        4
DS        4
SWH       23609.523 Hz
FIDRES    0.726603 Hz
AQ        1.3763061 sec
RG        19.625
OR        27.000 usec
PR        6.50 usec
PC        298.2 K
D1        2.00000000 sec
D11       0.03000000 sec
TEC       1
SFO1      100.6354036 MHz
NUC1      13C
PQ        3.33 usec
PT        10.00 usec
SI        32768
SF        100.6253410 MHz
WDW       EM
SSB       0
LB        1.00 Hz
GB        0
PC        1.40
    
```



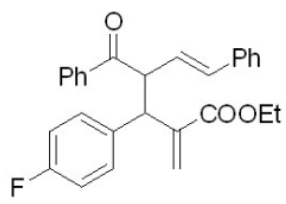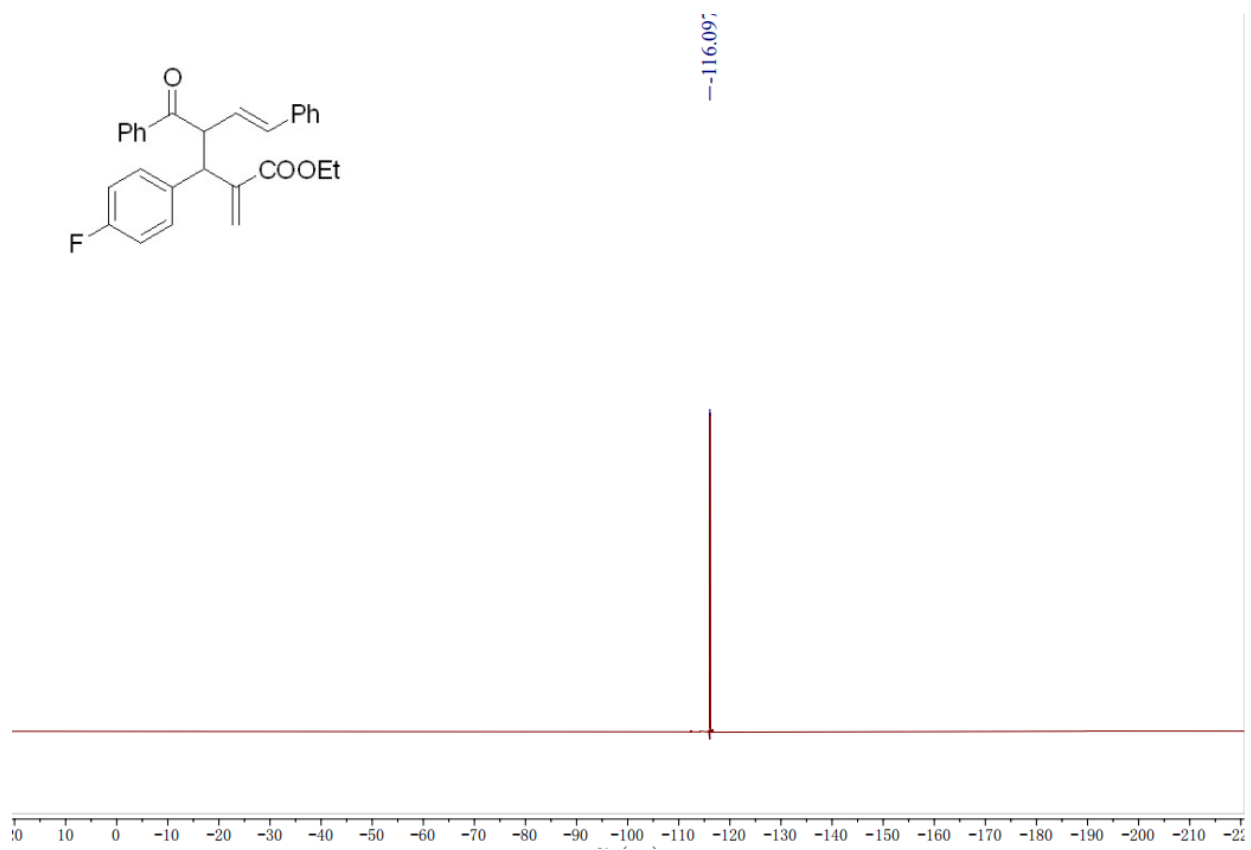

<sup>1</sup>H NMR and <sup>13</sup>C NMR Spectra for Compound 5j

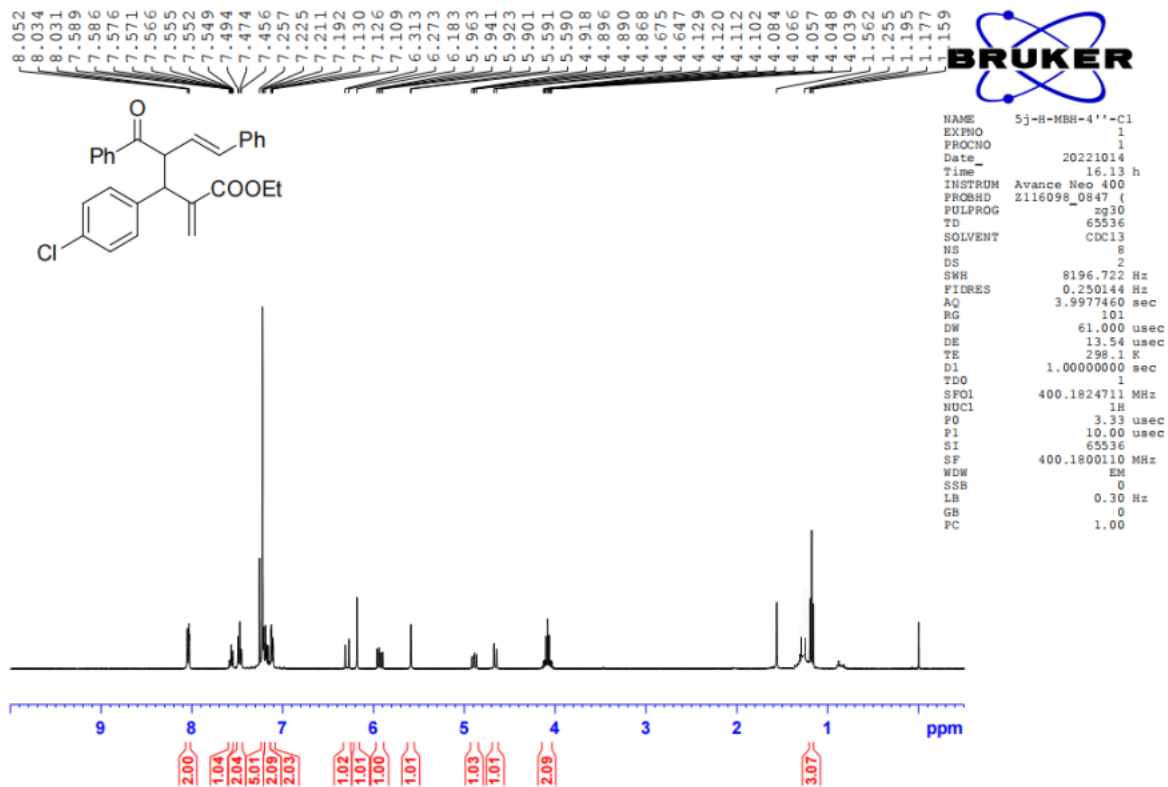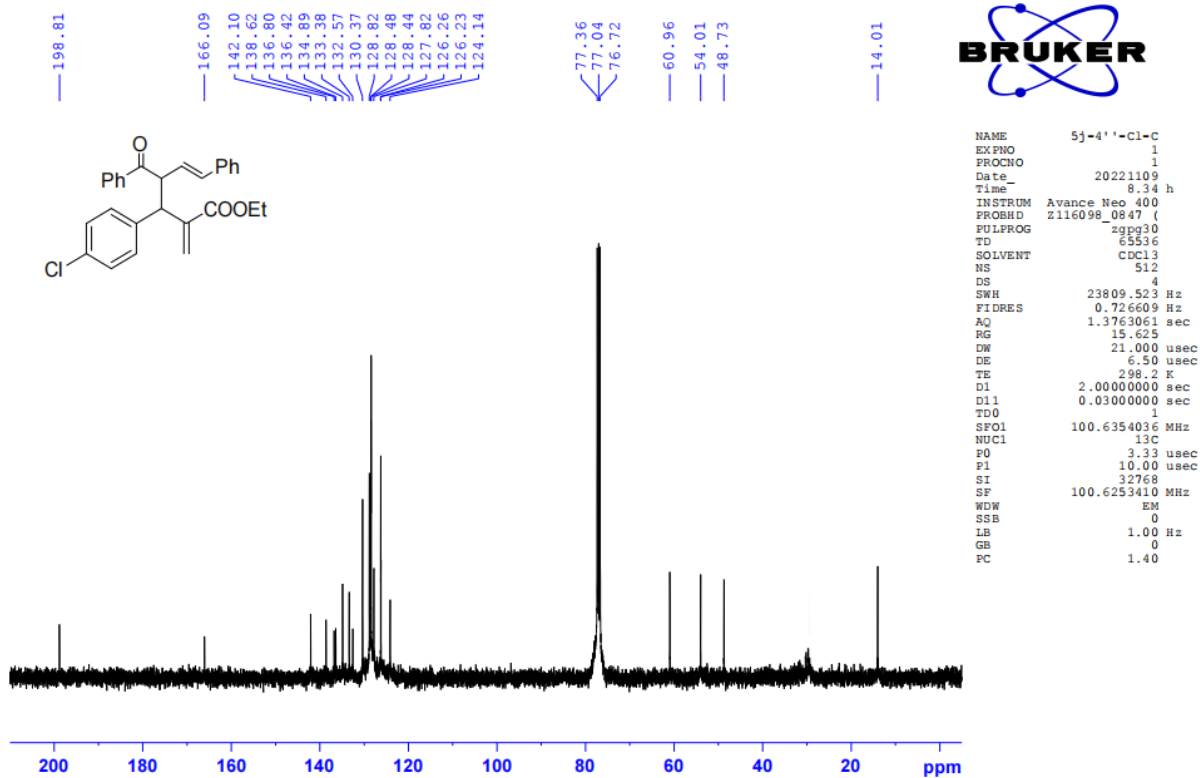

<sup>1</sup>H NMR and <sup>13</sup>C NMR Spectra for Compound 5k

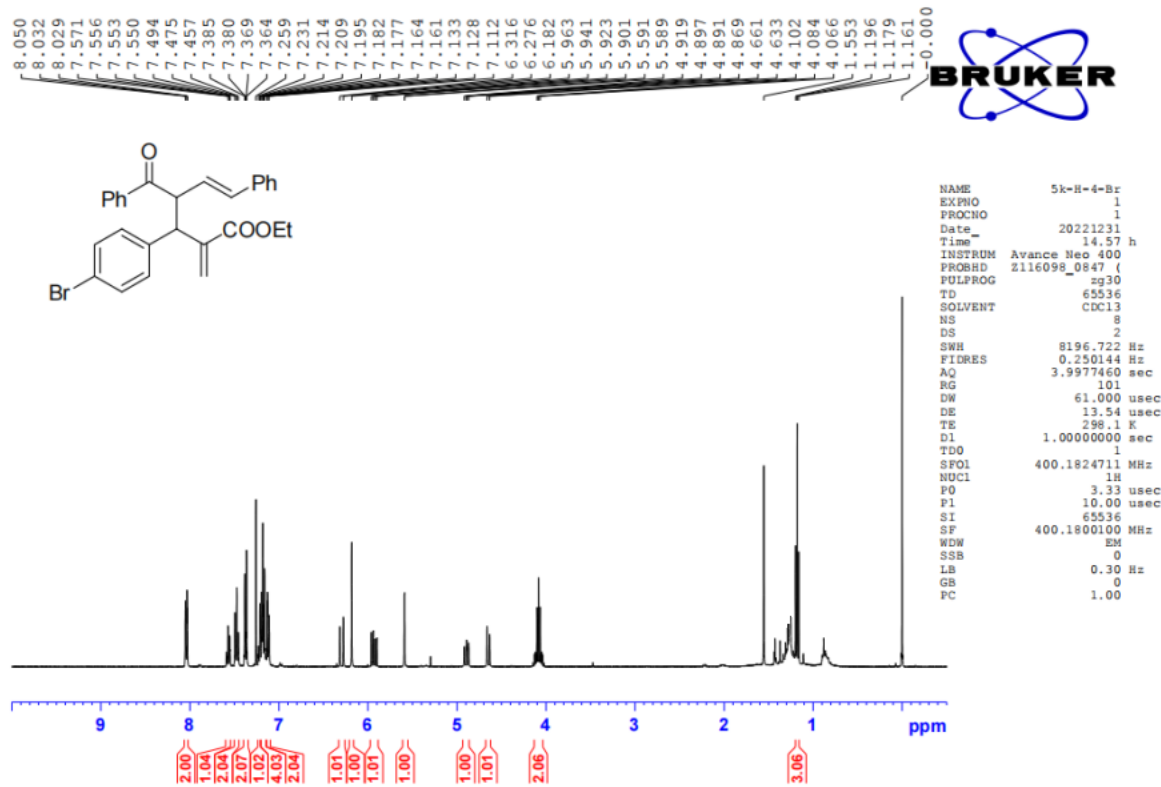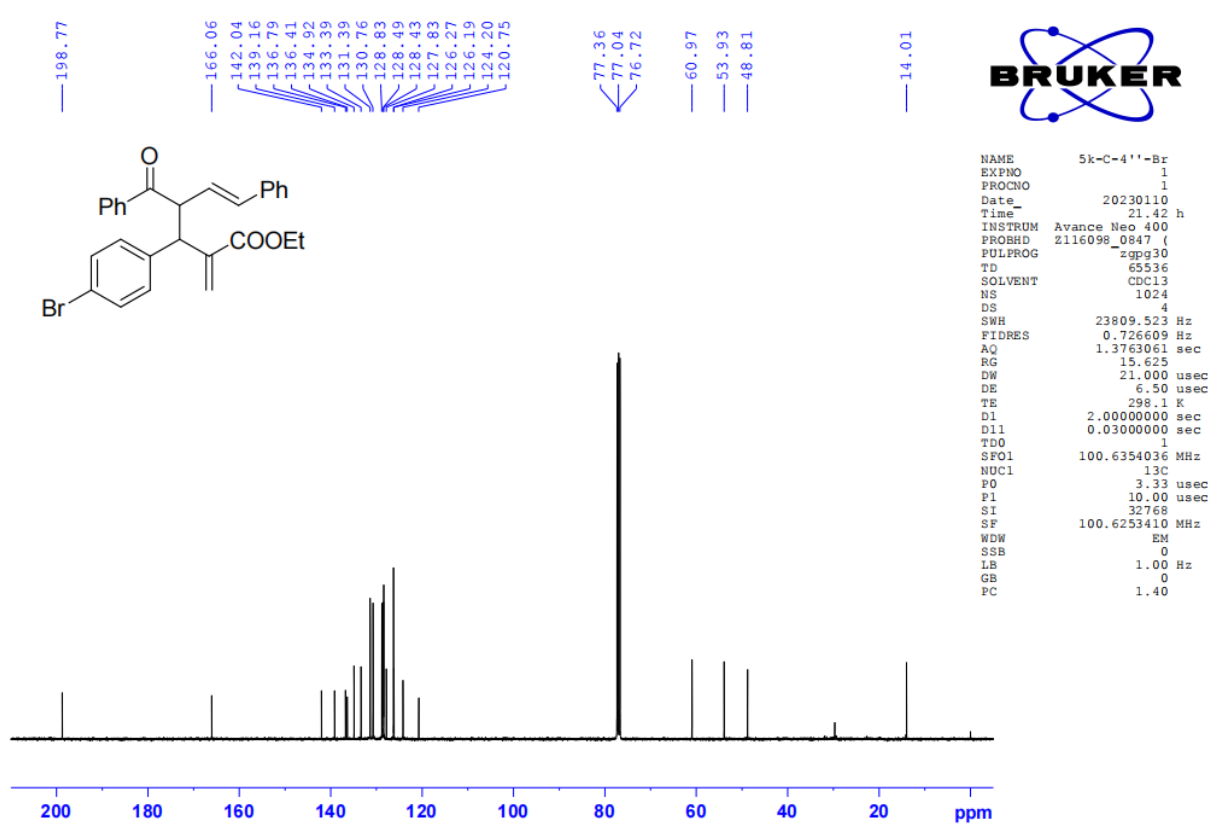

<sup>1</sup>H NMR and <sup>13</sup>C NMR Spectra for Compound 4a

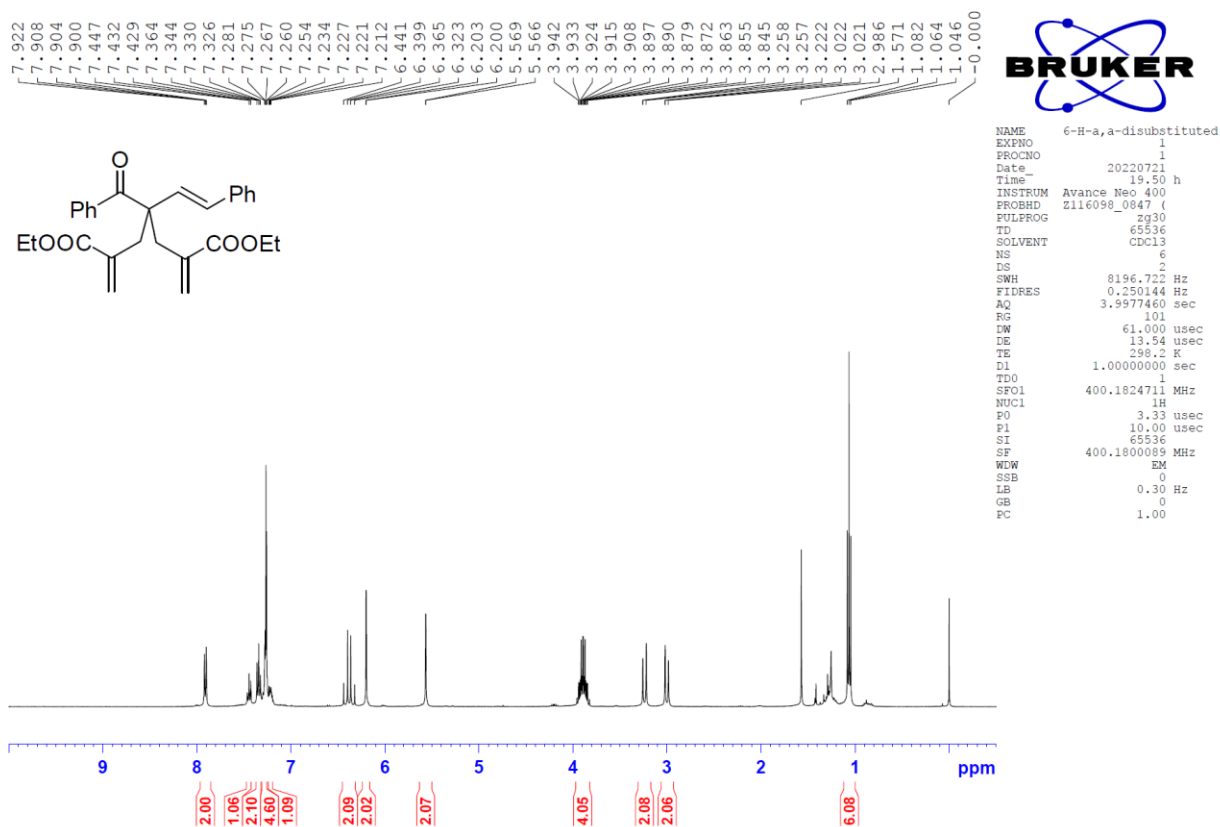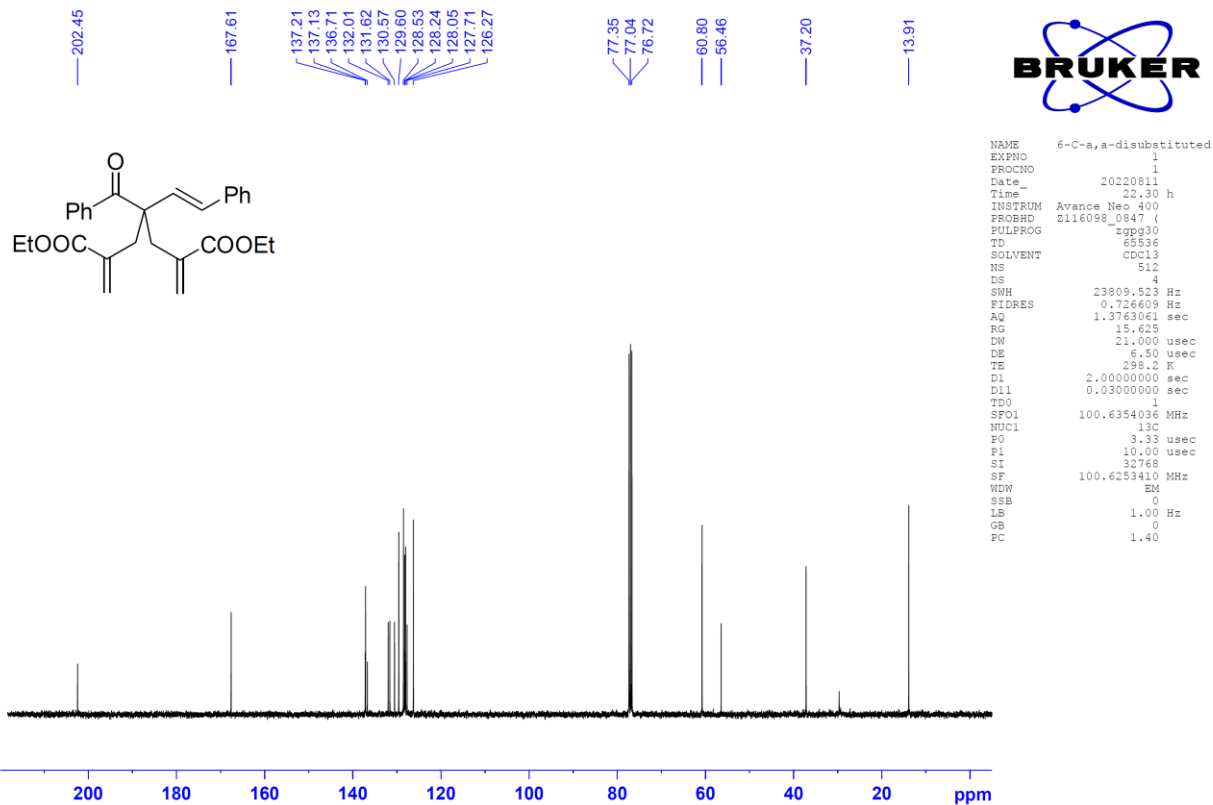

<sup>1</sup>H NMR, <sup>13</sup>C NMR and 2D-NOESY Spectra for Compound 6a

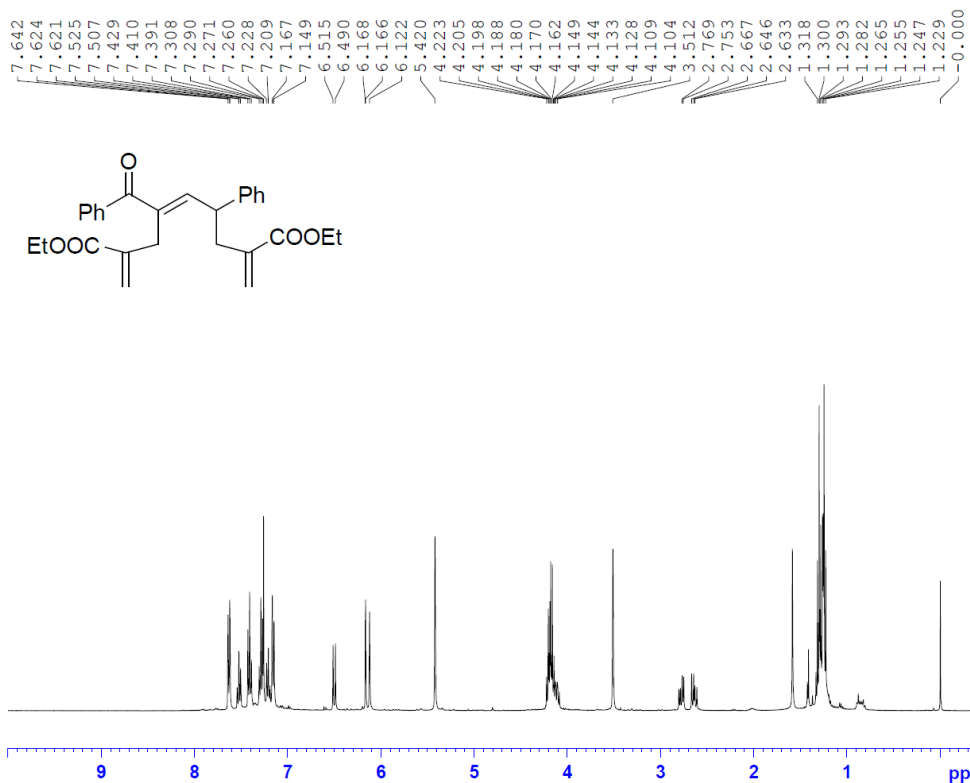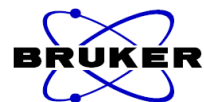

```

NAME      6a-H-ay-disubstituted
EXPNO     1
PROCNO    1
Date_     20220721
Time      19.45 h
INSTRUM   Avance Neo 400
PROBHD    Z116098_0847 (
PULPROG   zg30
TD         65536
SOLVENT   CDCl3
NS         6
DS         2
SWH        8196.722 Hz
FIDRES     0.250144 Hz
AQ         3.9977460 sec
RG         101
DW         61.000 usec
DE         13.54 usec
TE         298.1 K
D1         1.00000000 sec
TD0        4
SFO1       400.1824711 MHz
NUC1       1H
PO         3.33 usec
PI         10.00 usec
SI         65536
SF         400.1800091 MHz
WDW        EM
SSB        0
LB         0.30 Hz
GB         0
PC         1.00
    
```

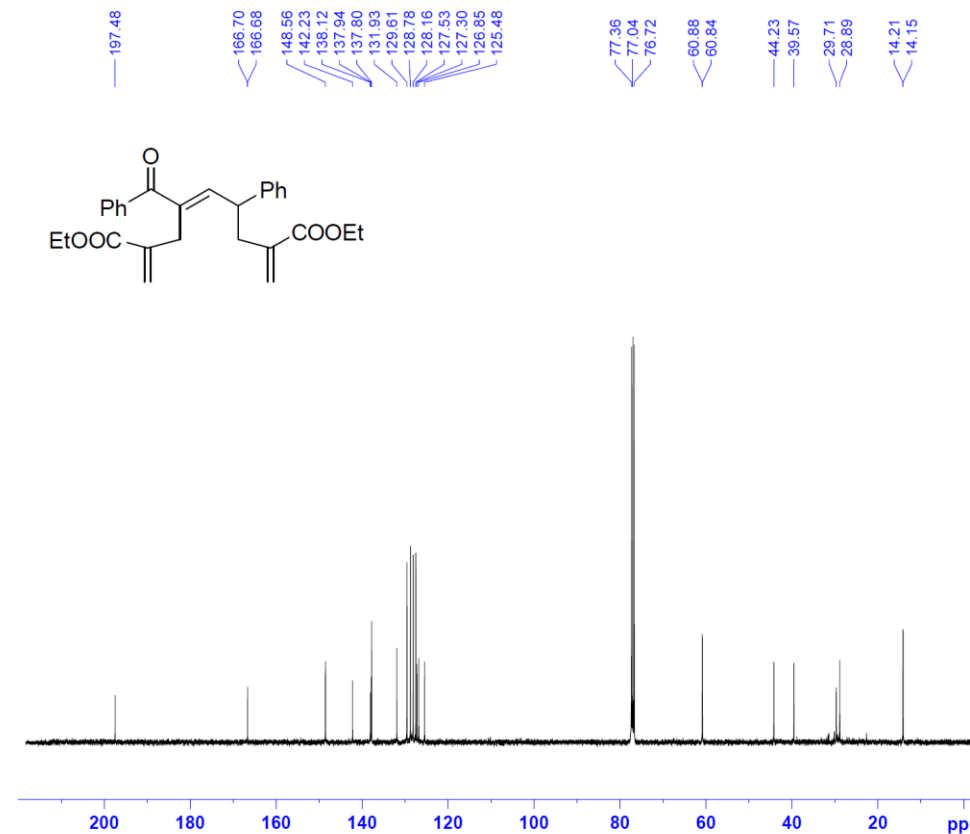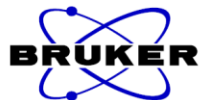

```

NAME      6a-C-ay-disubstituted
EXPNO     1
PROCNO    1
Date_     20220811
Time      23.04 h
INSTRUM   Avance Neo 400
PROBHD    Z116098_0847 (
PULPROG   zgpg30
TD         65536
SOLVENT   CDCl3
NS         512
DS         4
SWH        23809.523 Hz
FIDRES     0.726609 Hz
AQ         1.3763061 sec
RG         15.625
DW         21.000 usec
DE         6.50 usec
TE         298.2 K
D1         2.00000000 sec
D11        0.03000000 sec
TD0        1
SFO1       100.6354036 MHz
NUC1       13C
PO         3.33 usec
PI         10.00 usec
SI         32768
SF         100.6253410 MHz
WDW        EM
SSB        0
LB         1.00 Hz
GB         0
PC         1.40
    
```

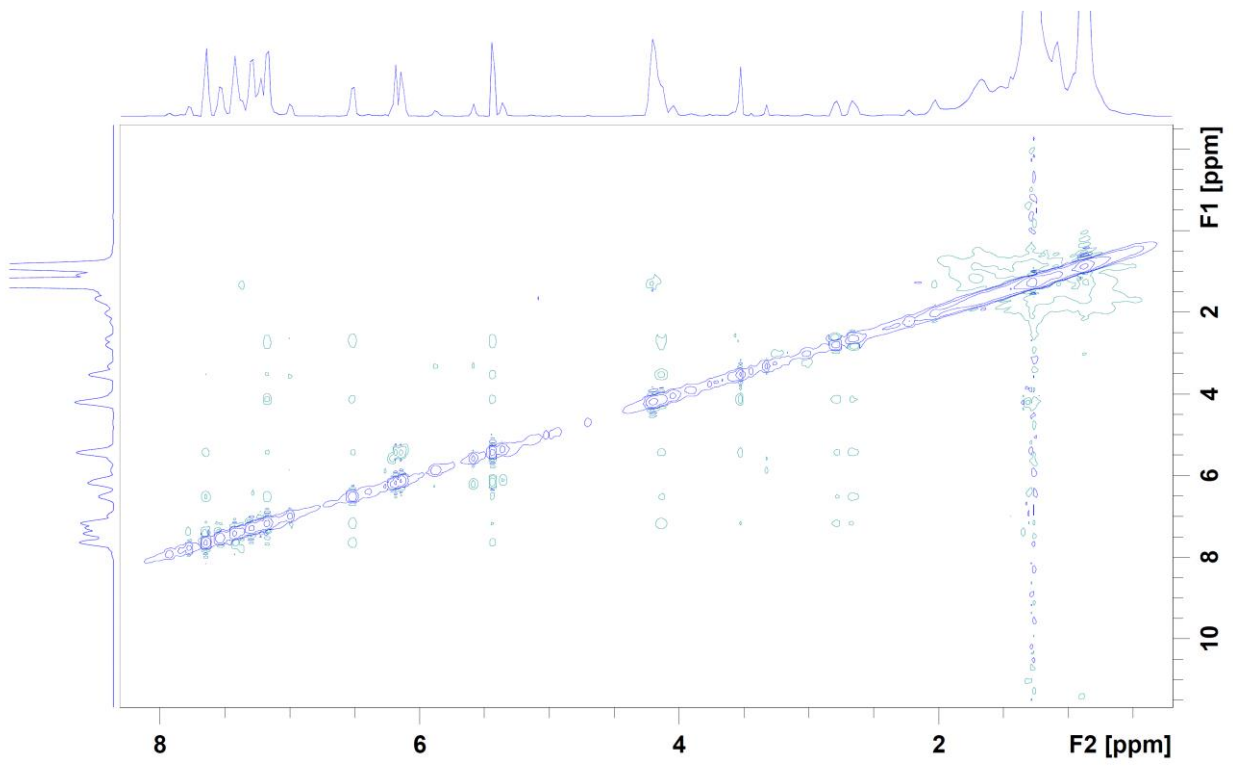

<sup>1</sup>H NMR and <sup>13</sup>C NMR Spectra for Compound 4b

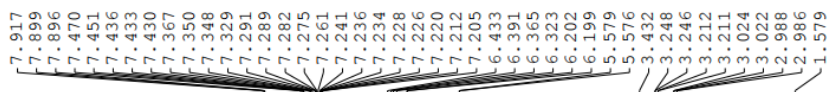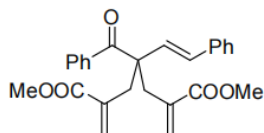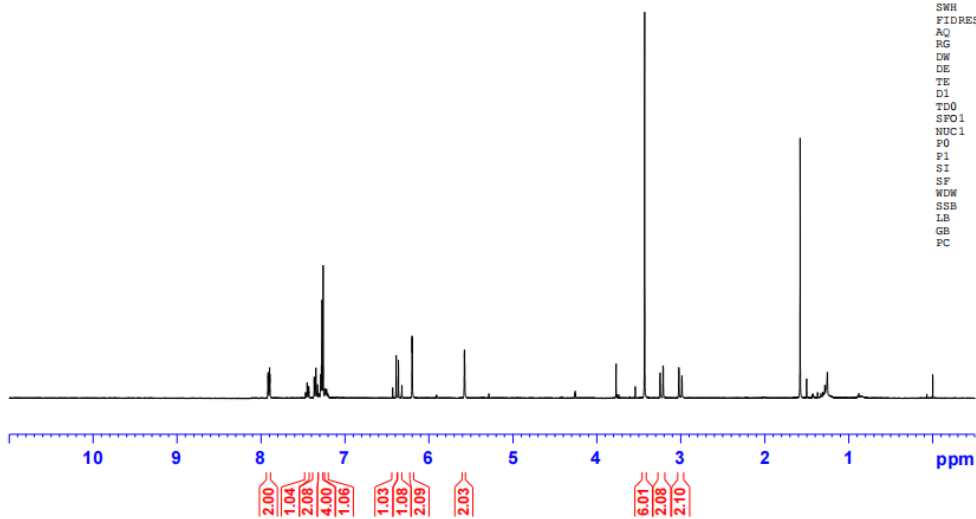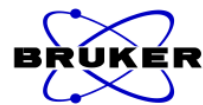

```

NAME      4b-H-MBH-Me-a, a-10-06
EXPNO     1
PROCNO    1
Date_     20221007
Time      19.32 h
INSTRUM   Avance Neo 400
PROBHD    Z116098_0847 (
PULPROG   zgpg30
TD         65536
SOLVENT   CDCl3
NS         8
DS         2
SWH        8196.722 Hz
FIDRES     0.250144 Hz
AQ         3.9977460 sec
RG         101
DW         61.000 usec
DE         13.54 usec
TE         298.1 K
D1         1.00000000 sec
TDO        1
SFO1       400.1824711 MHz
NUC1       1H
P0         3.33 usec
P1         10.00 usec
SI         65536
SF         400.1800085 MHz
WDW        EM
SSB        0
LB         0.30 Hz
GB         0
PC         1.00
    
```

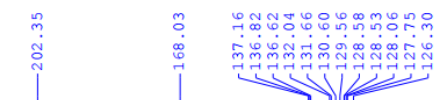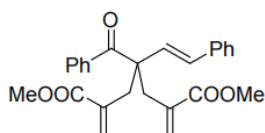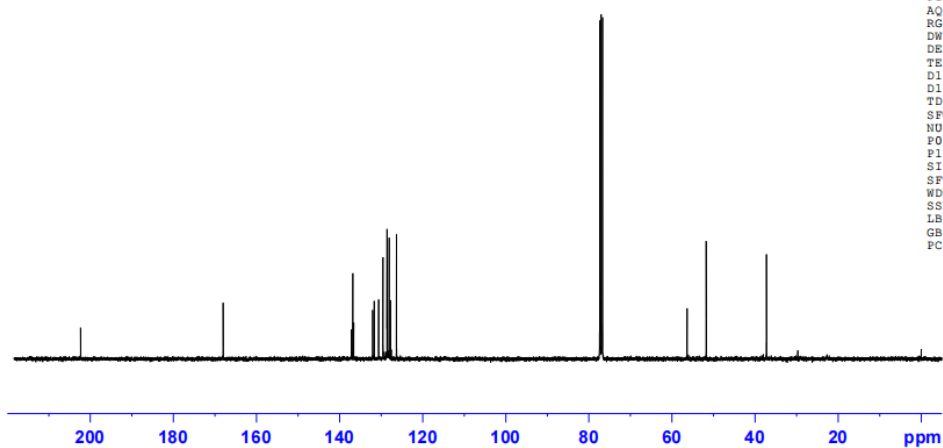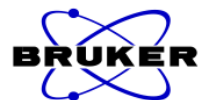

```

NAME      4b-C-MBH-Me-a, a
EXPNO     1
PROCNO    1
Date_     20221214
Time      6.28 h
INSTRUM   Avance Neo 400
PROBHD    Z116098_0847 (
PULPROG   zgpg30
TD         65536
SOLVENT   CDCl3
NS         512
DS         4
SWH        23809.523 Hz
FIDRES     0.726609 Hz
AQ         1.3763061 sec
RG         15.625
DW         21.000 usec
DE         6.50 usec
TE         298.1 K
D1         2.00000000 sec
D11        0.03000000 sec
TDO        1
SFO1       100.6354036 MHz
NUC1       13C
P0         3.33 usec
P1         10.00 usec
SI         32768
SF         100.6253410 MHz
WDW        EM
SSB        0
LB         1.00 Hz
GB         0
PC         1.40
    
```





<sup>1</sup>H NMR and <sup>13</sup>C NMR Spectra for Compound 4c

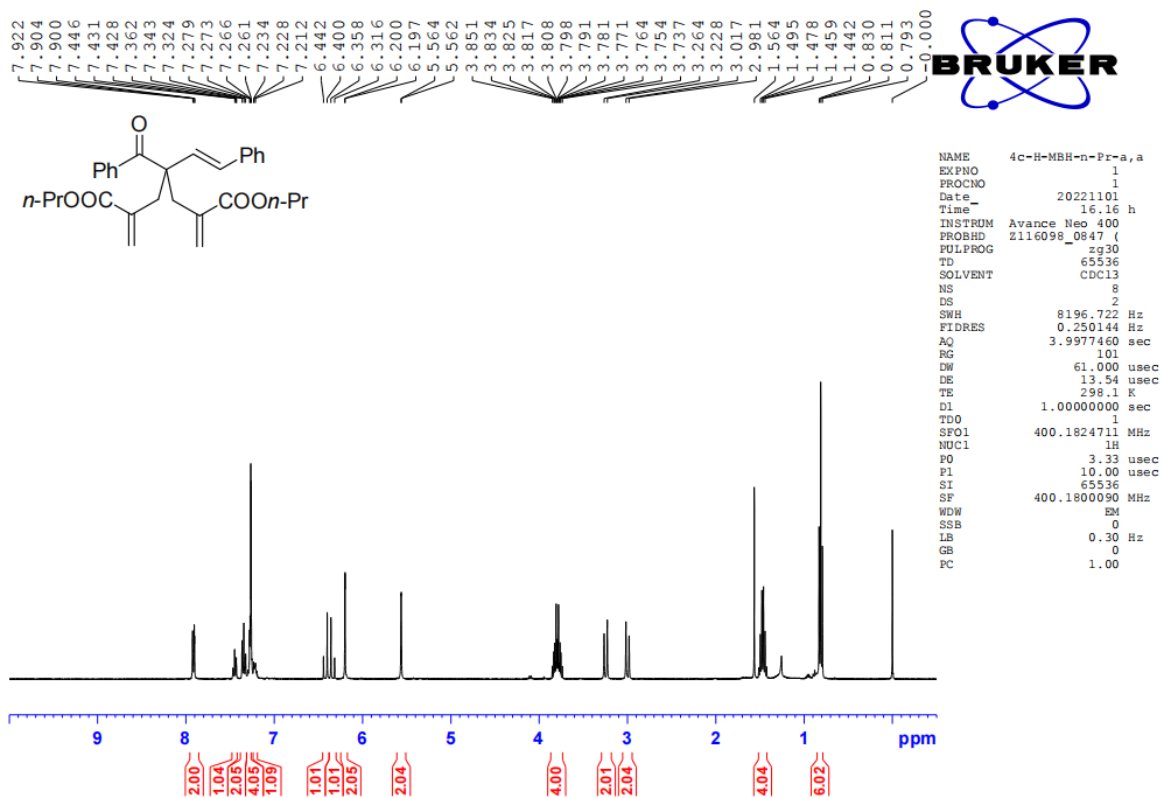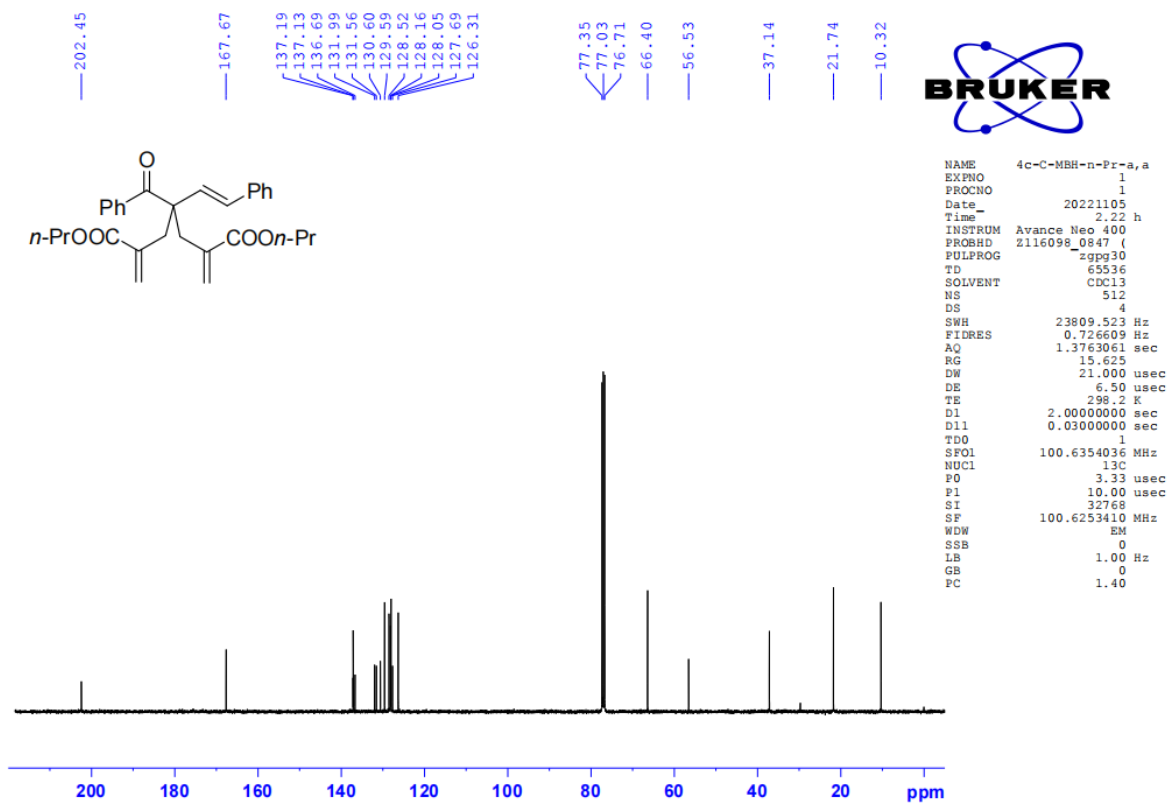

<sup>1</sup>H NMR and <sup>13</sup>C NMR Spectra for Compound 6c

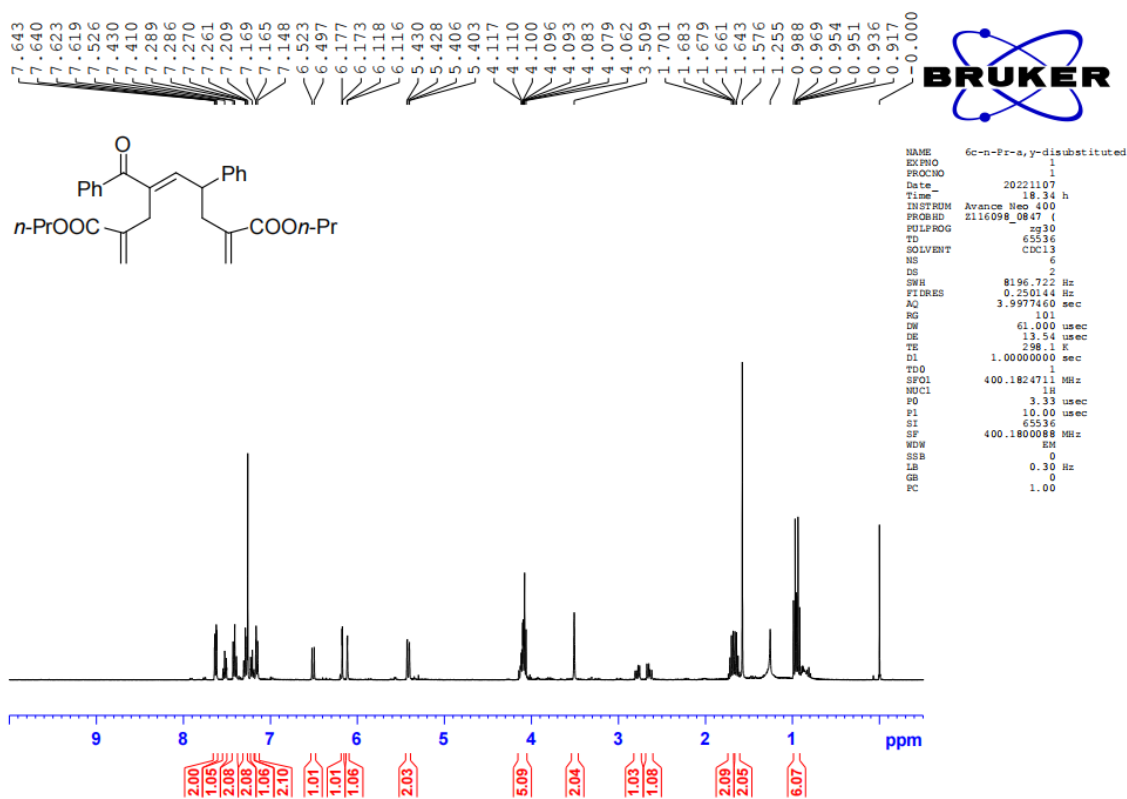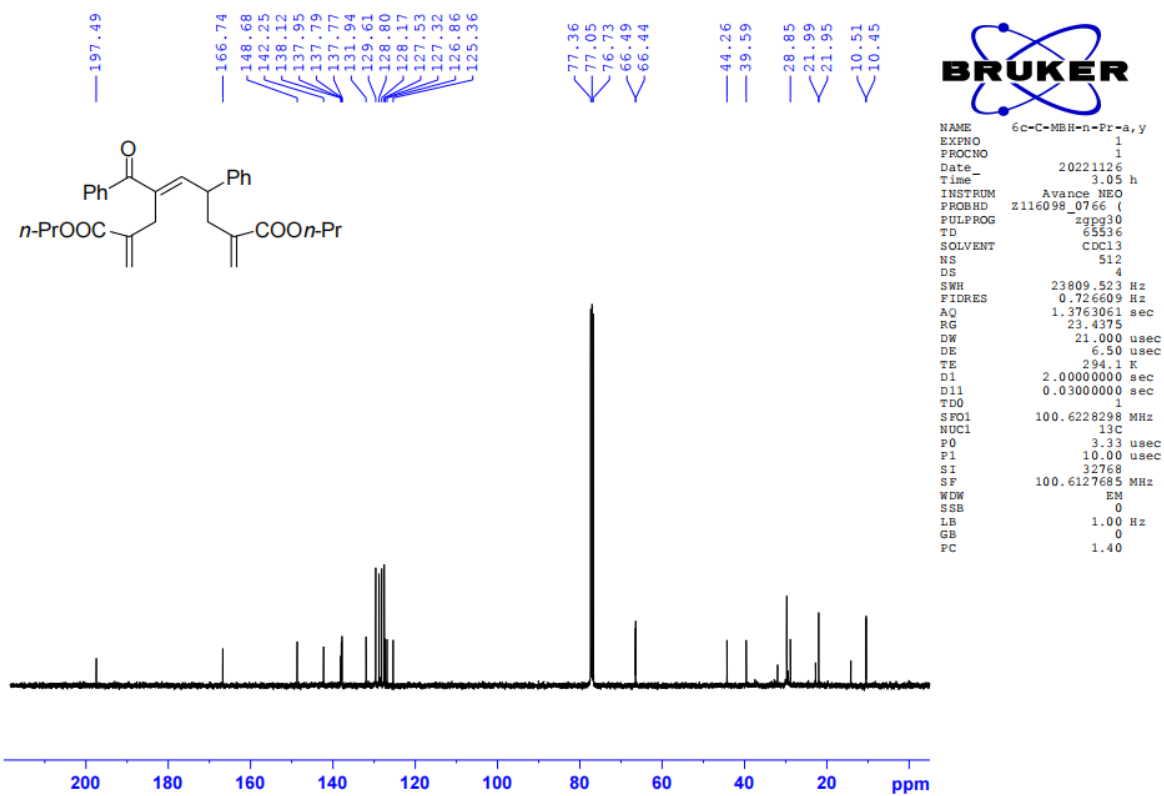



<sup>1</sup>H NMR and <sup>13</sup>C NMR Spectra for Compound 6d

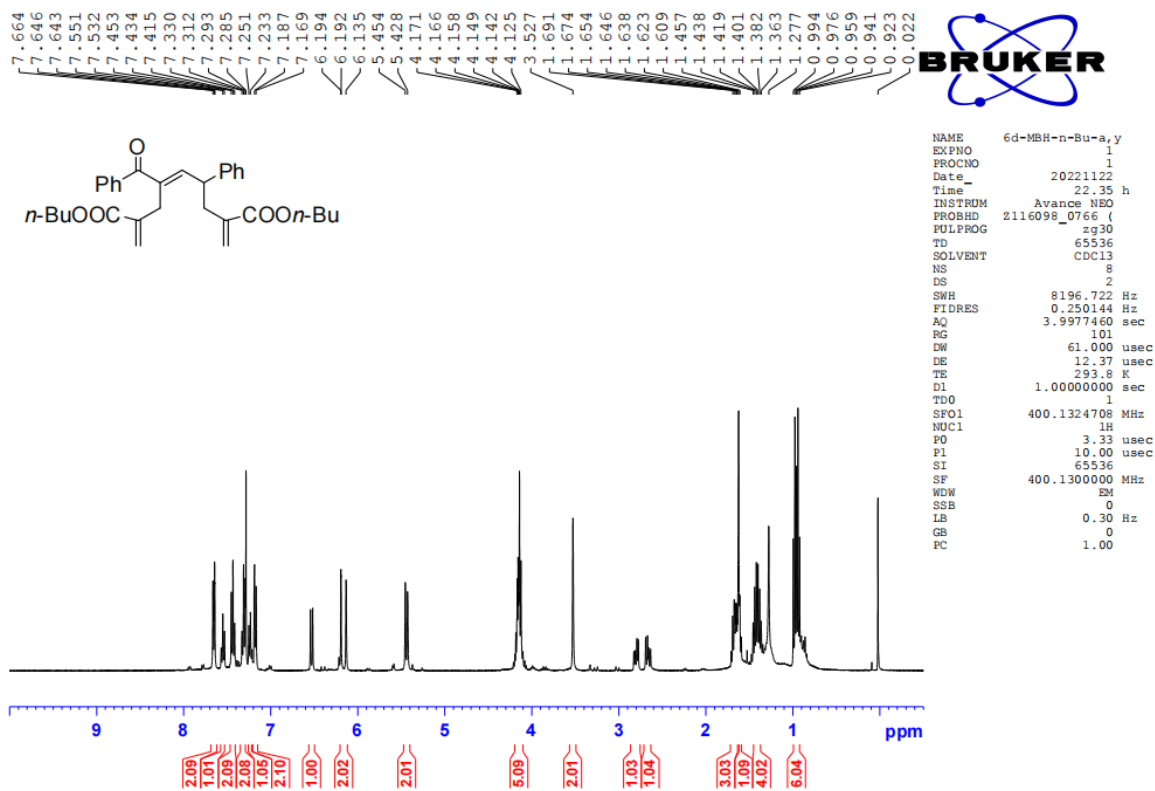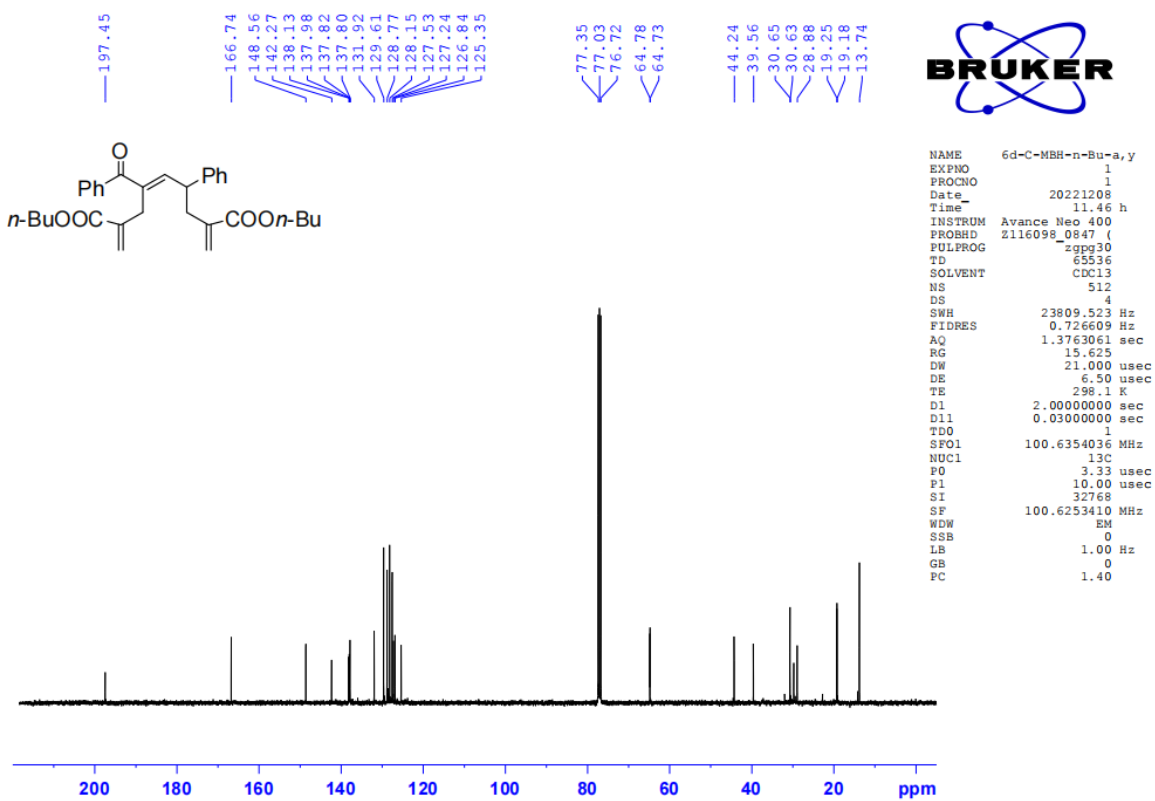

<sup>1</sup>H NMR and <sup>13</sup>C NMR Spectra for Compound 4e

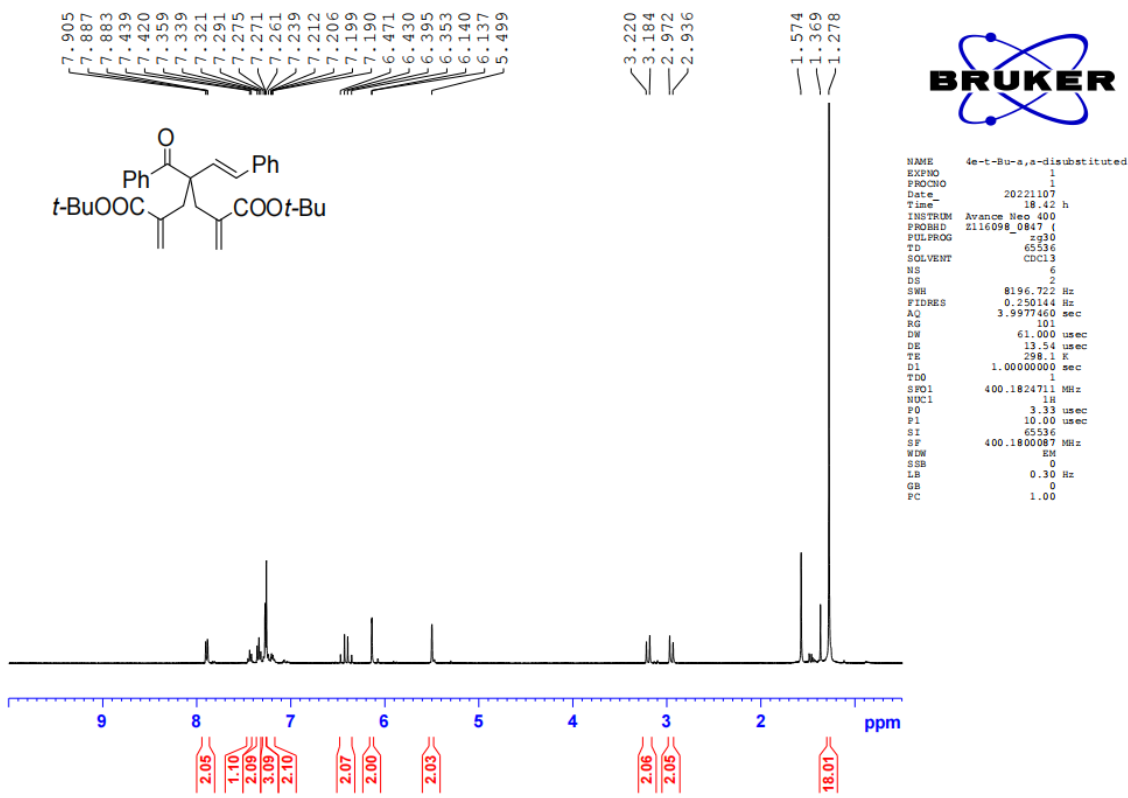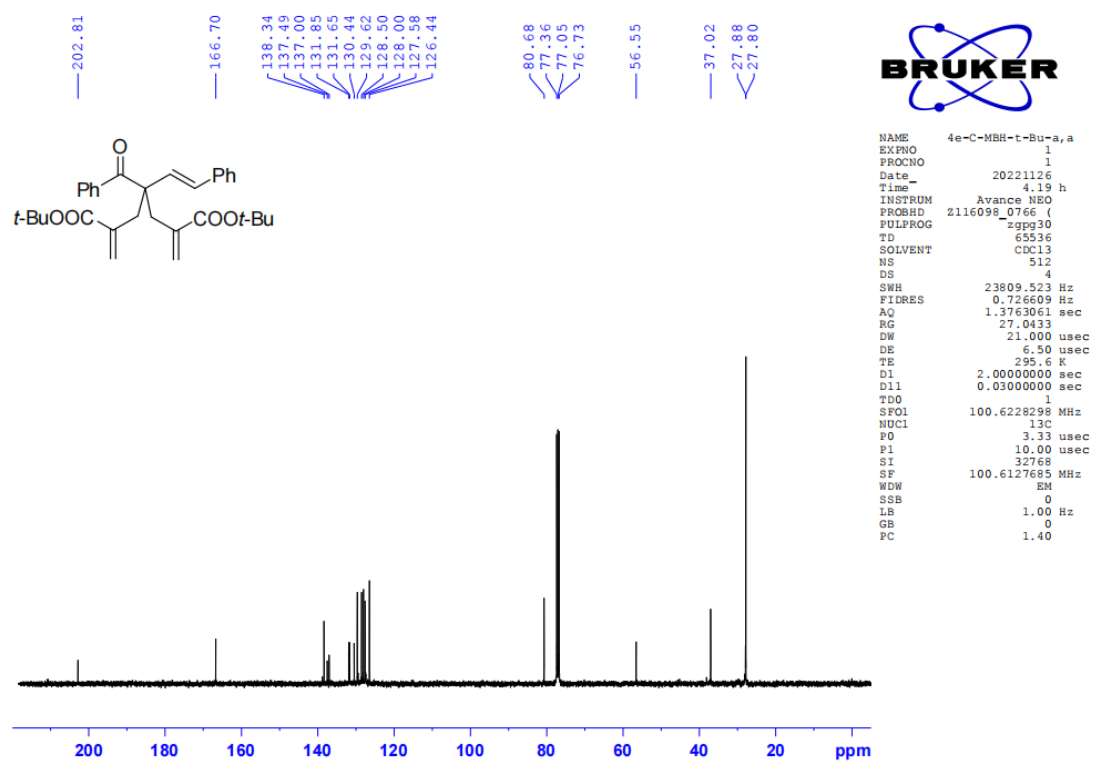

<sup>1</sup>H NMR and <sup>13</sup>C NMR Spectra for Compound 6e

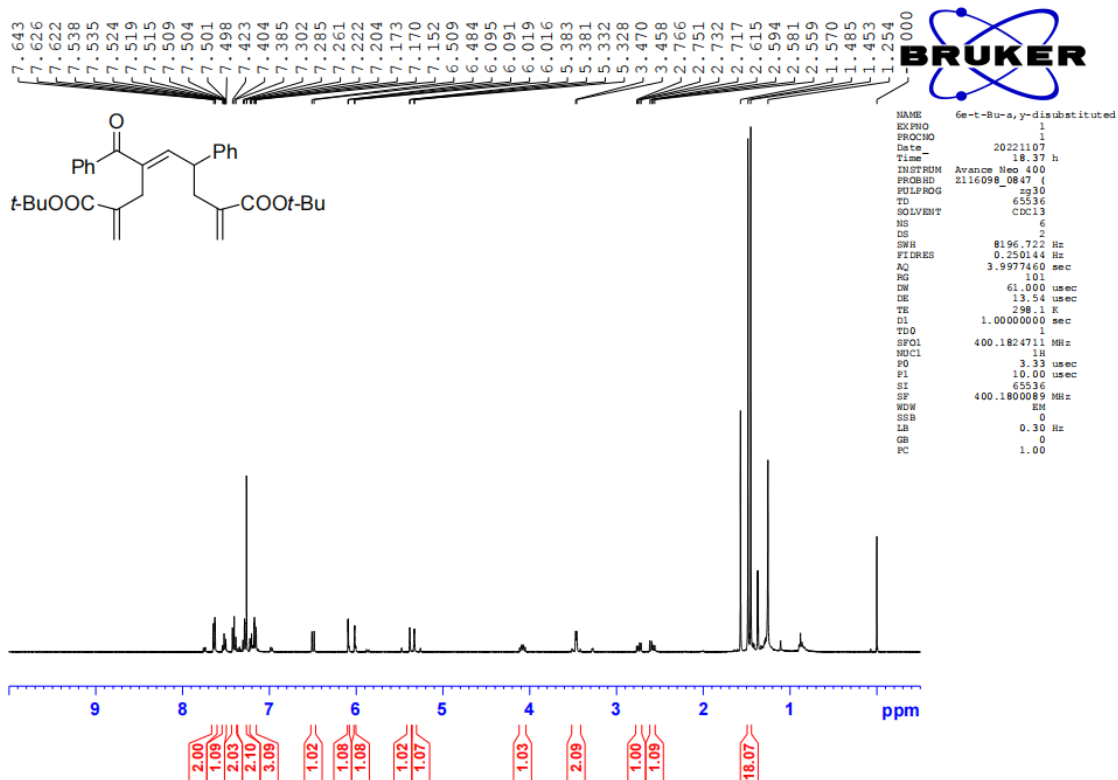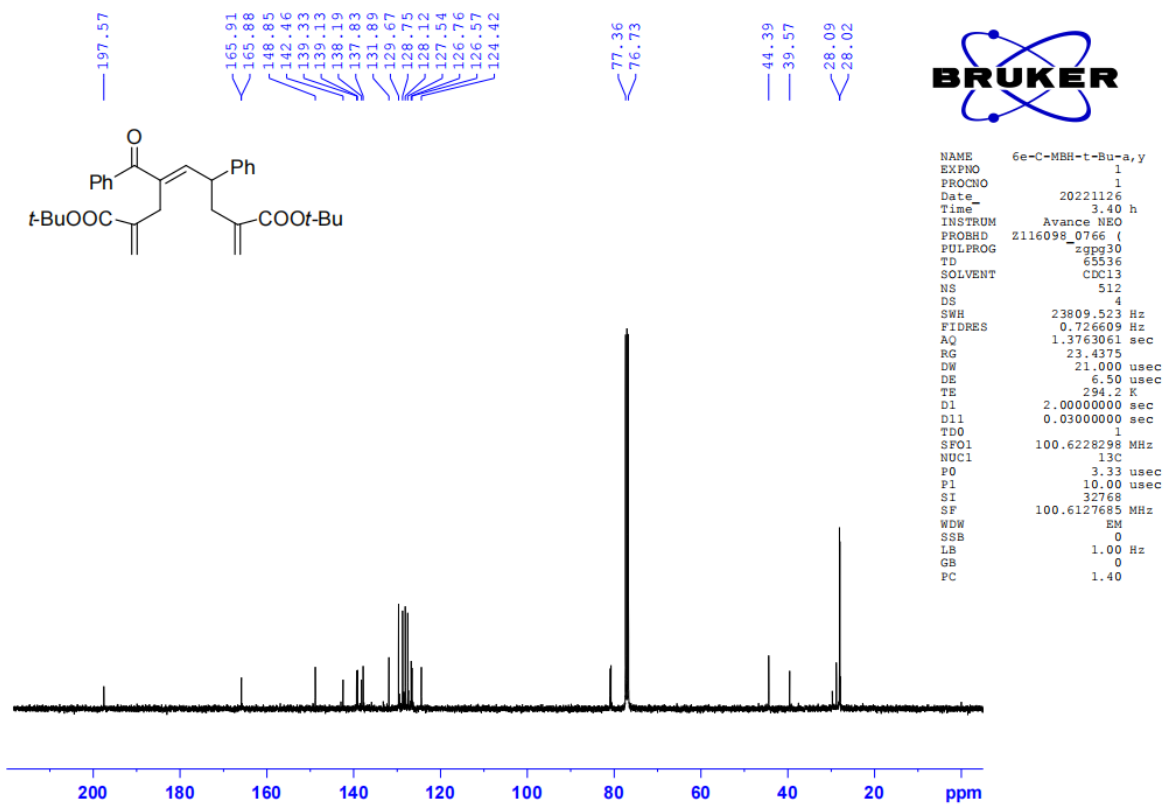

<sup>1</sup>H NMR and <sup>13</sup>C NMR Spectra for Compound 4f

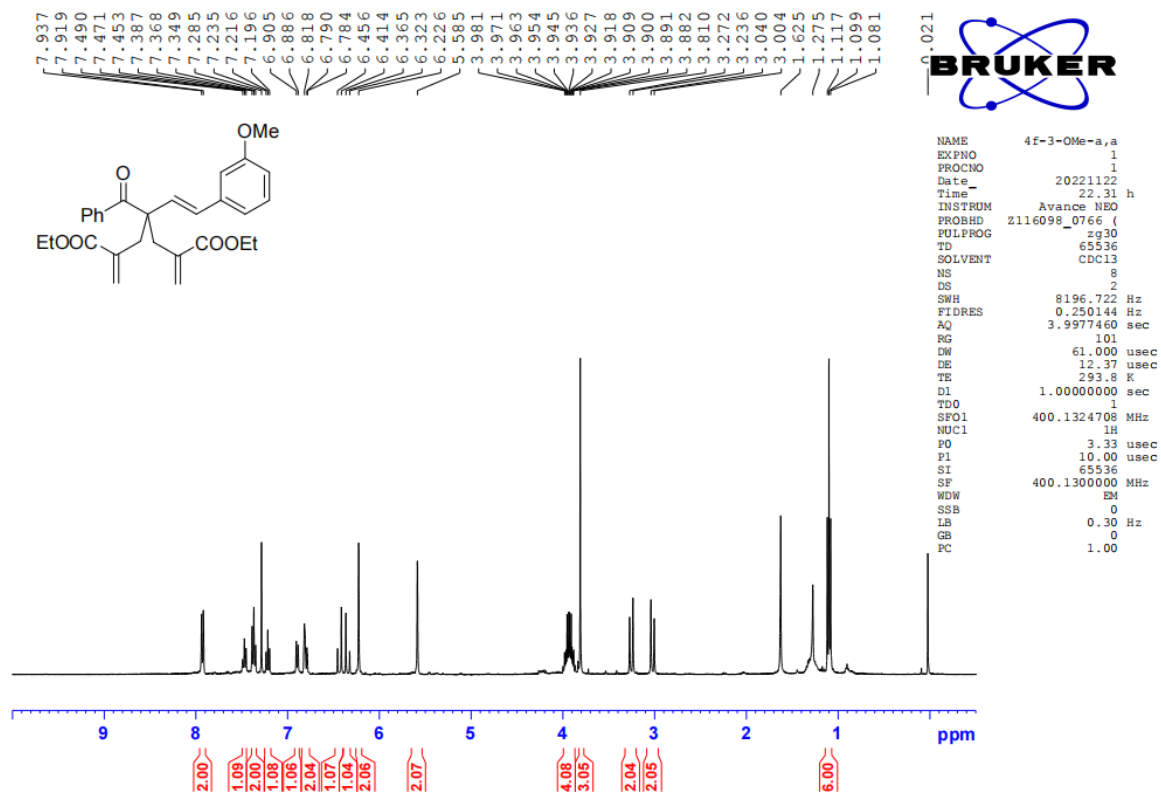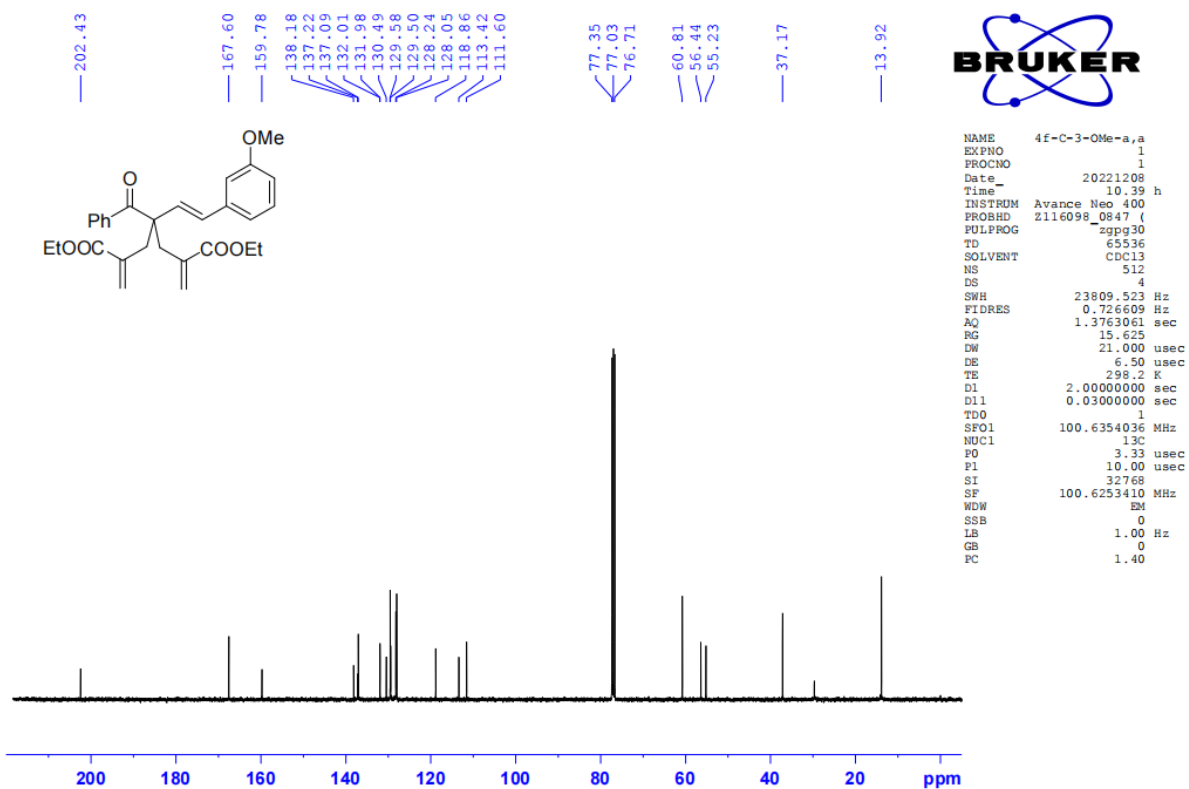

<sup>1</sup>H NMR and <sup>13</sup>C NMR Spectra for Compound 4h

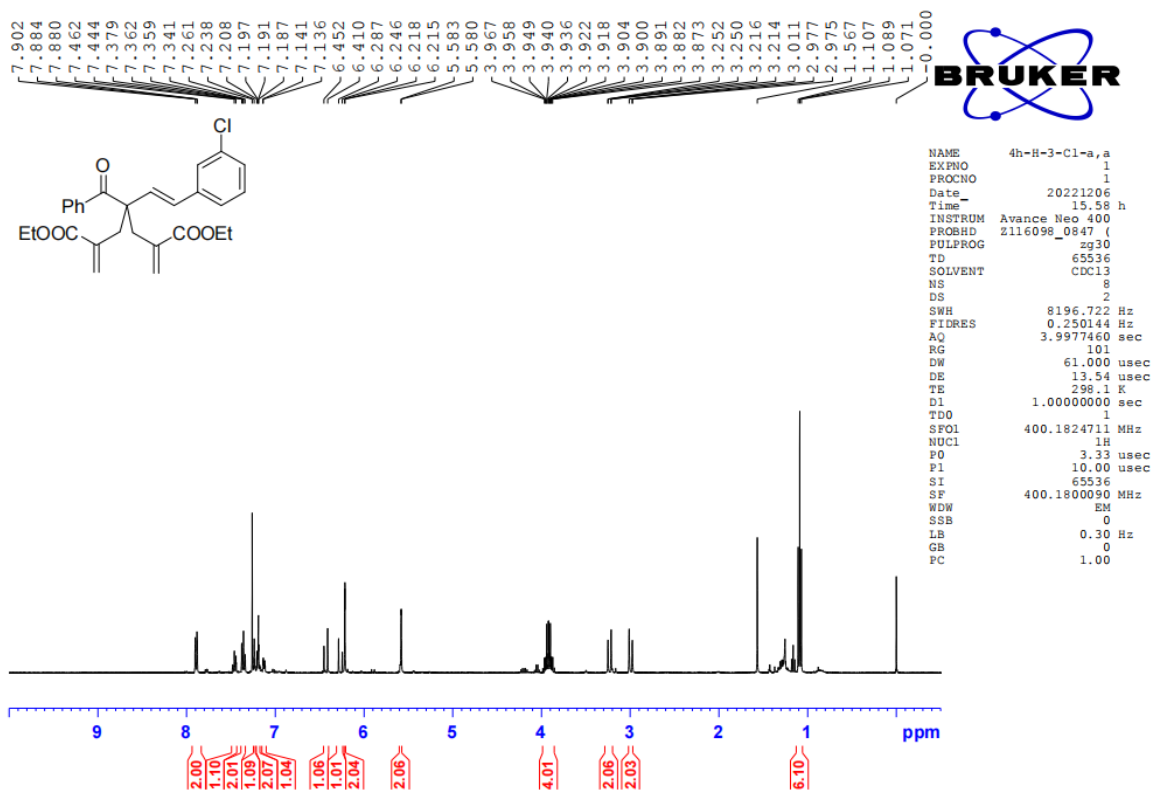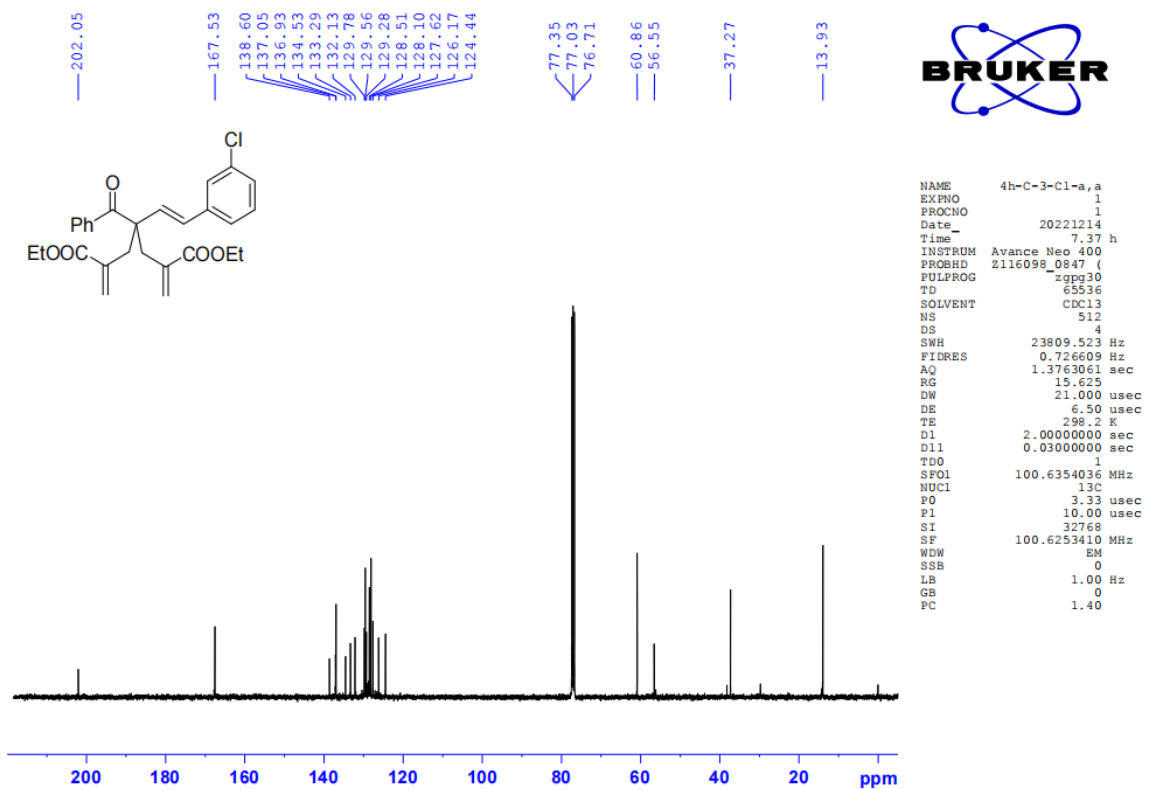



<sup>1</sup>H NMR and <sup>13</sup>C NMR Spectra for Compound 4i

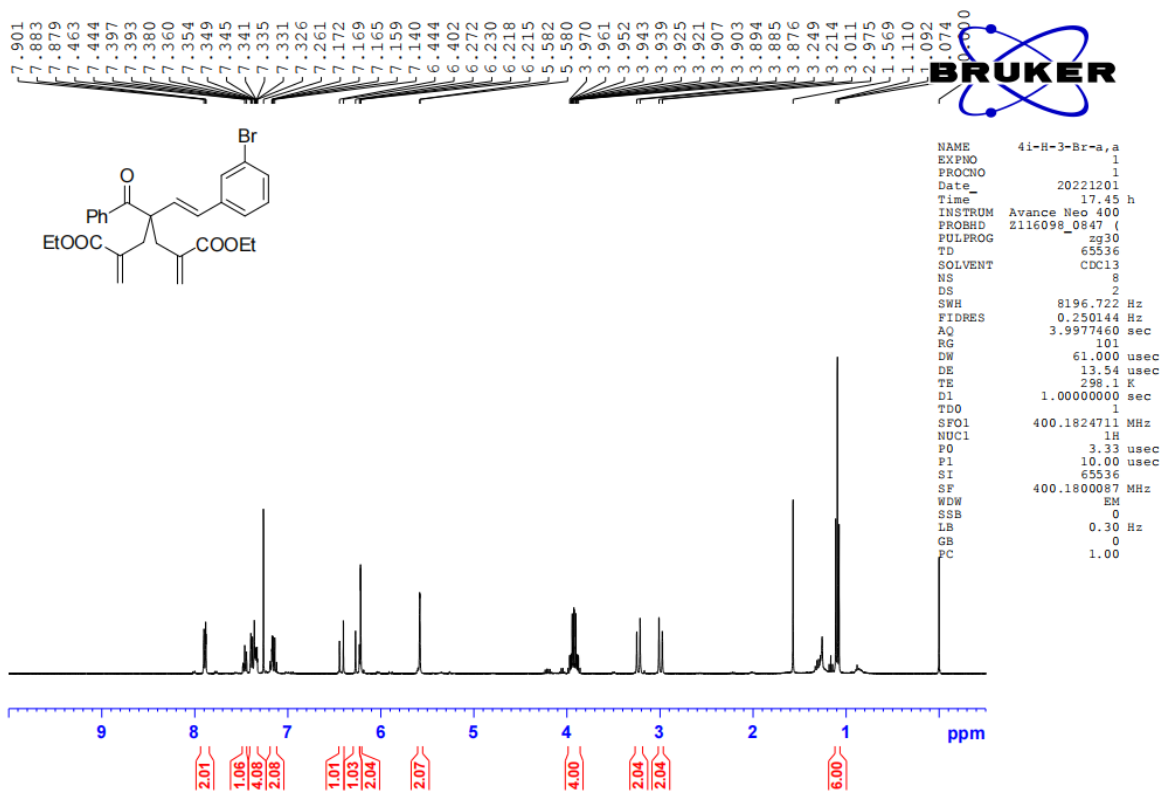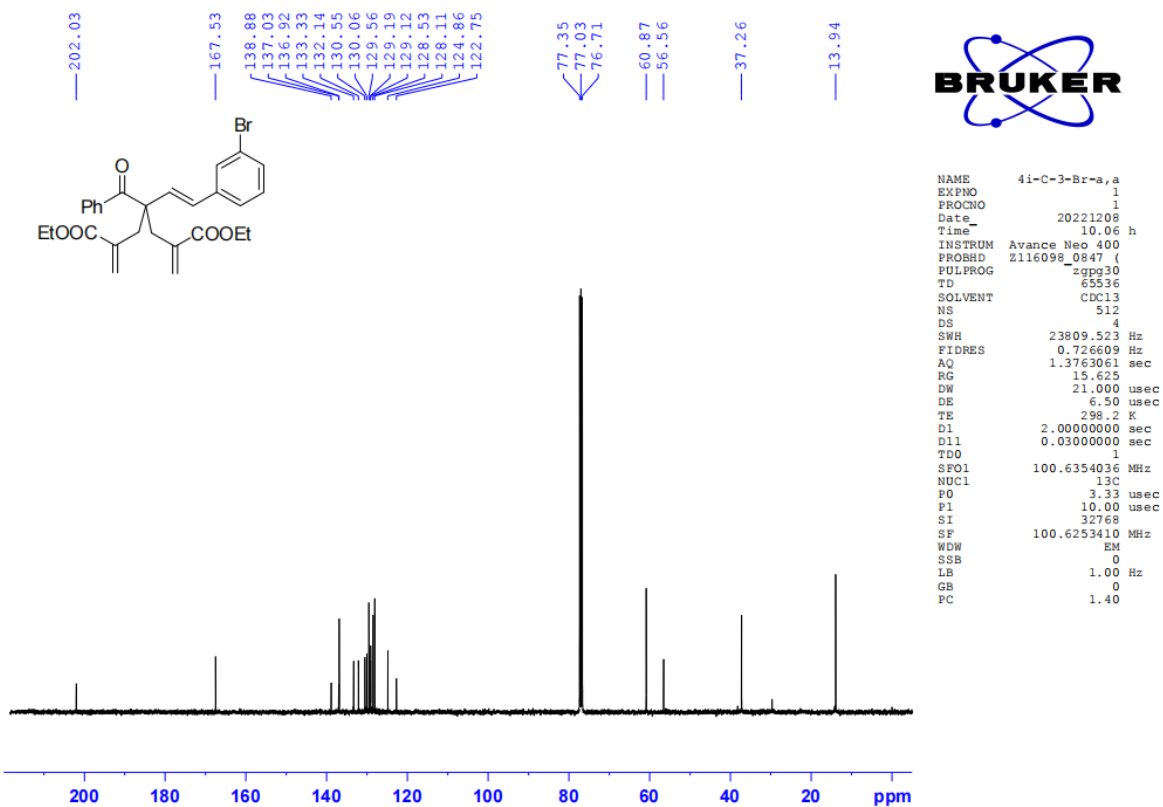

<sup>1</sup>H NMR and <sup>13</sup>C NMR Spectra for Compound 6i

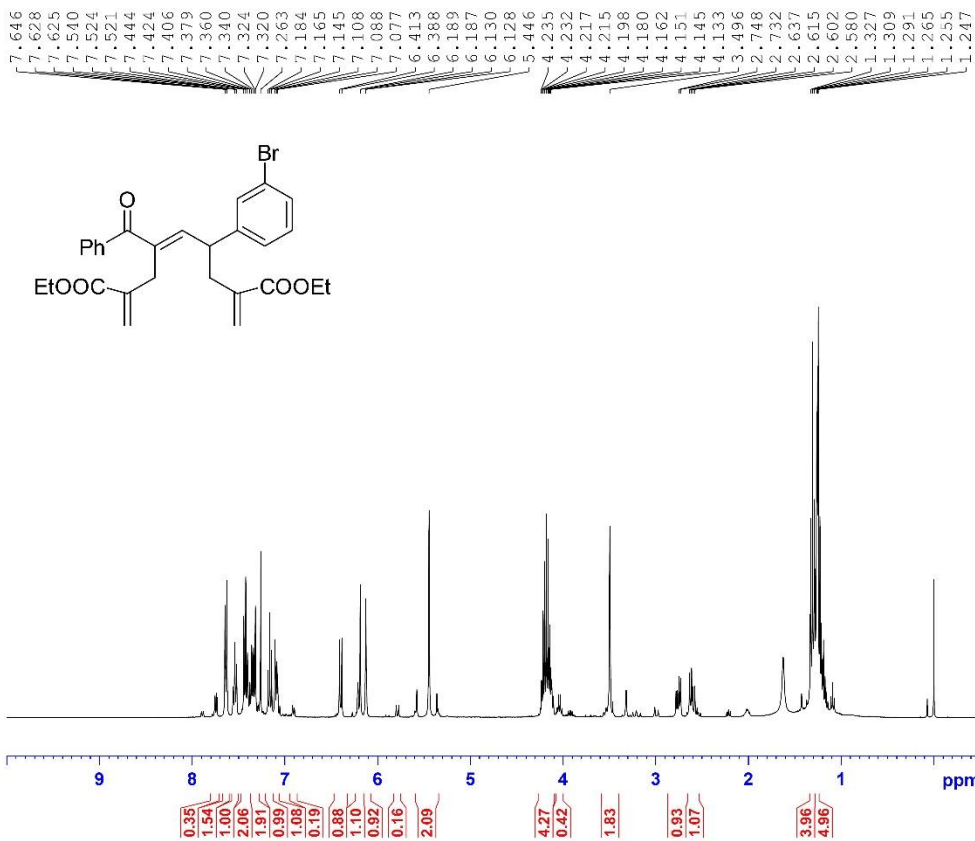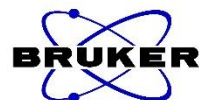

```

NAME      6i-H-20240709
EXPNO    1
PROCNO   1
Date_    20240710
Time     17.54 h
INSTRUM  Avance Neo 400
PROBHD   Z116099_0847 (
PULPROG  zgpg30
TD        65536
SOLVENT  CDCl3
NS        8
DS        2
SWH       8196.722 Hz
FIDRES   0.255144 Hz
AQ        3.9977460 sec
RG        101
DW        61.000 usec
DE        13.54 usec
TE        298.2 K
DELTA    1.0000000 sec
C50       1
SFO1     400.1824711 MHz
NUC1      1H
PC        3.33 usec
PL        10.00 usec
SI        65536
SF        400.1800082 MHz
WDW       EM
SSB       0
LB        0.30 Hz
GB        0
PC        1.00
    
```

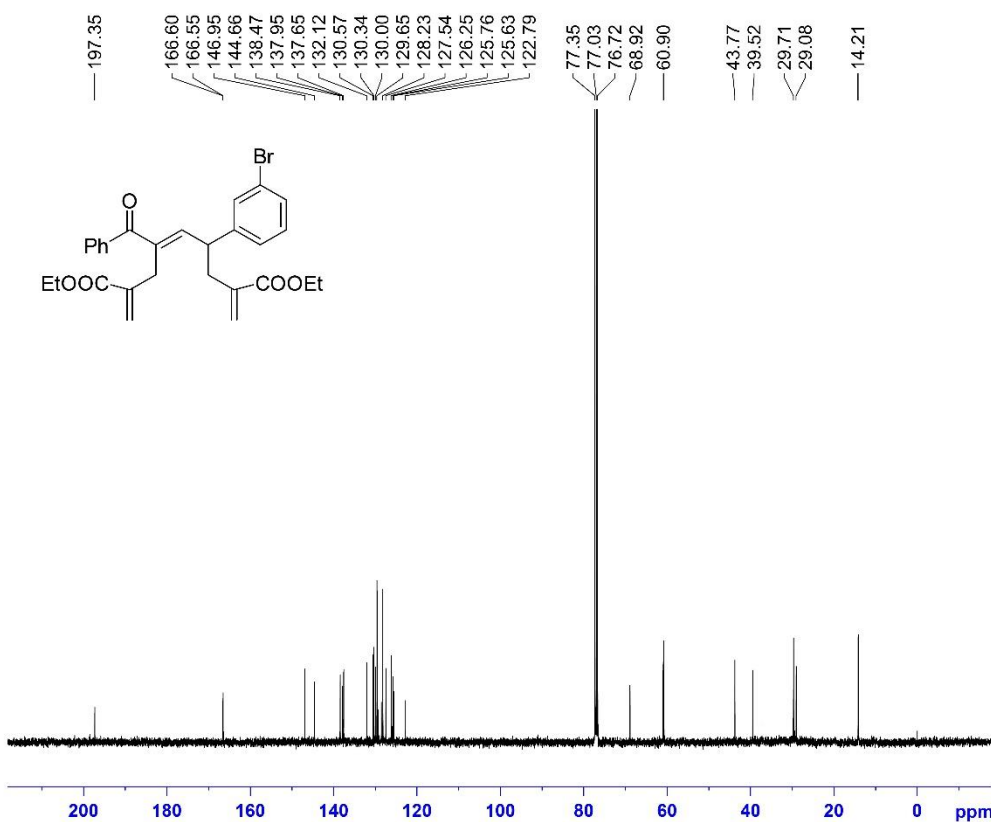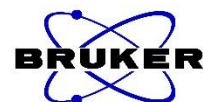

```

NAME      6i-C-3-Br-a,y
EXPNO    1
PROCNO   1
Date_    20230311
Time     6.48 h
INSTRUM  Avance Neo 400
PROBHD   Z116099_0847 (
PULPROG  zgpg30
TD        65536
SOLVENT  CDCl3
NS        4
DS        4
SWH       23809.593 Hz
FIDRES   0.728608 Hz
AQ        1.3763061 sec
RG        15.625
DW        21.000 usec
DE        6.50 usec
TE        298.1 K
DELTA    2.0000000 sec
D11      0.23000000 sec
TEO       1
SFO1     100.6254026 MHz
NUC1      13C
PC        3.33 usec
PL        10.00 usec
SI        32768
SF        100.6253410 MHz
WDW       EM
SSB       0
LB        1.00 Hz
GB        0
PC        1.40
    
```

# <sup>1</sup>H NMR and <sup>13</sup>C NMR Spectra for Compounds 4k/6k

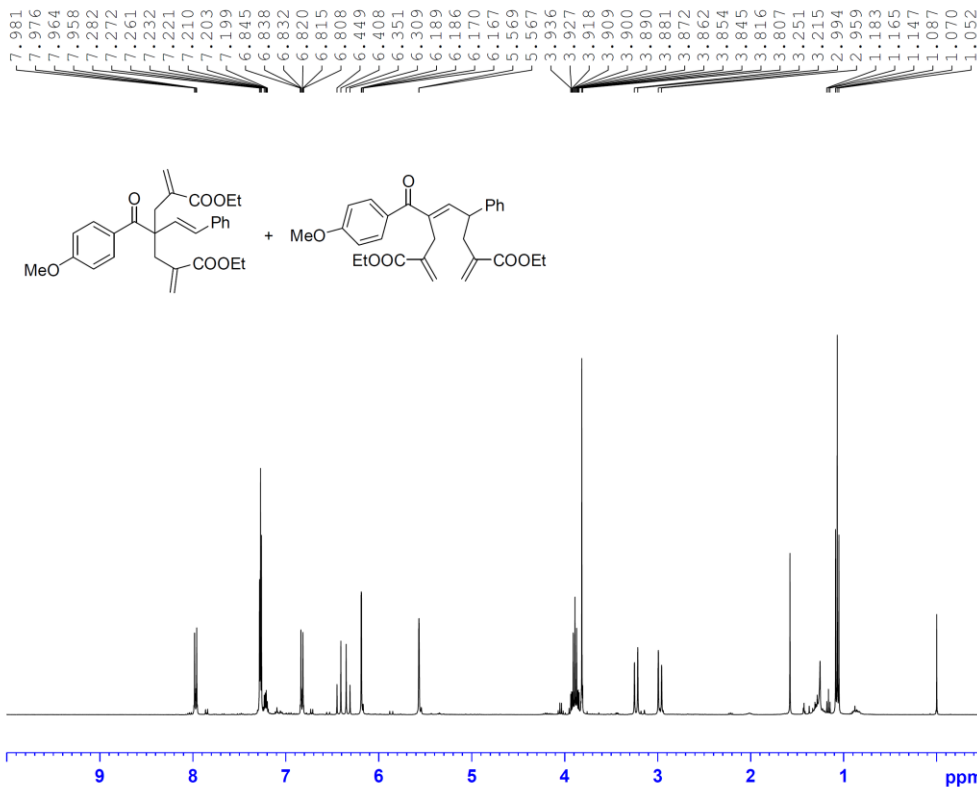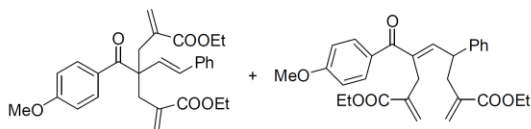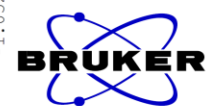

```

NAME      4k+6k-4'-OMe
EXPNO    1
PROCNO   1
Date_    20221206
Time     15.40 h
INSTRUM  Avance Neo 400
PROBHD   Z116098_0847 (
PULPROG  zg30
TD        65536
SOLVENT  CDCl3
NS        8
DS        2
SWH       8196.722 Hz
FIDRES    0.250144 Hz
AQ        3.9977460 sec
RG         101
DW         61.000 usec
DE         13.54 usec
TE         298.2 K
D1         1.00000000 sec
TD0        1
SF01      400.1824711 MHz
NUC1      1H
P0         3.33 usec
F1         10.00 usec
SI         65536
SF         400.1800091 MHz
WDW        EM
SSB         0
LB         0.30 Hz
GB         0
PC         1.00
    
```

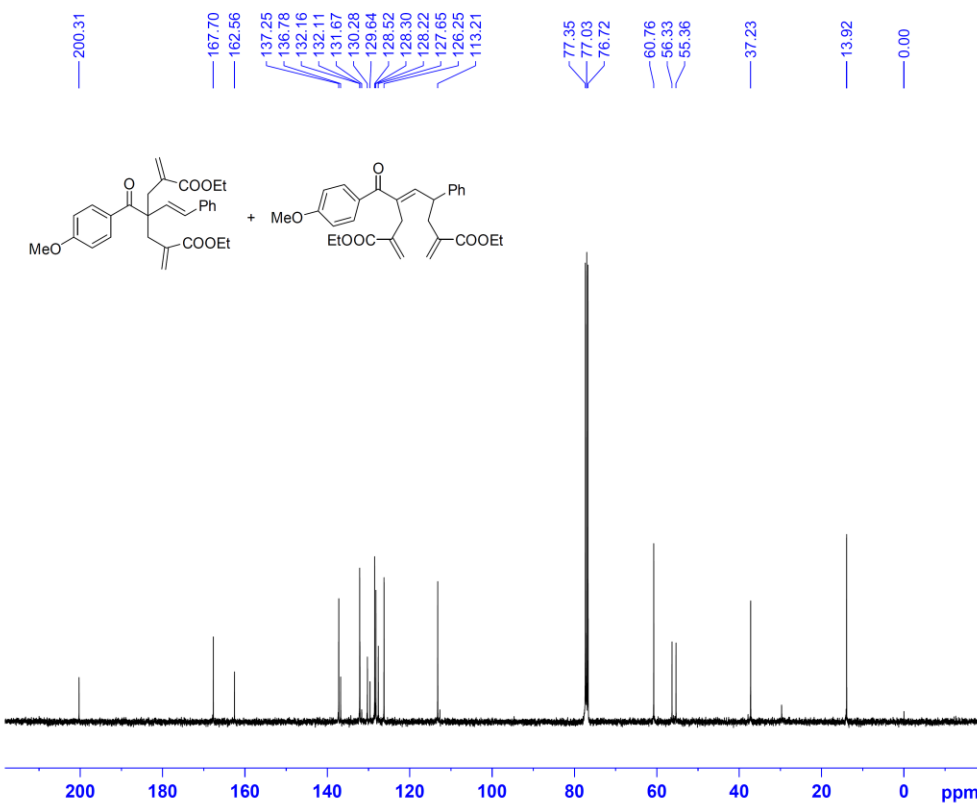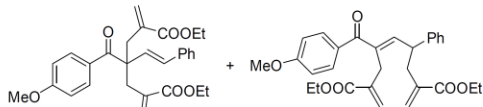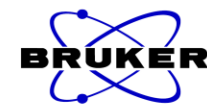

```

NAME      4k+6k-4'-OMe-C
EXPNO    1
PROCNO   1
Date_    20221214
Time     7.03 h
INSTRUM  Avance Neo 400
PROBHD   Z116098_0847 (
PULPROG  zgpg30
TD        65536
SOLVENT  CDCl3
NS        512
DS        4
SWH       23809.523 Hz
FIDRES    0.726609 Hz
AQ        1.3763061 sec
RG         15.625
DW         21.000 usec
DE         6.50 usec
TE         298.2 K
D1         2.00000000 sec
D11        0.03000000 sec
TD0        1
SF01      100.6354036 MHz
NUC1      13C
P0         3.33 usec
F1         10.00 usec
SI         32768
SF         100.6253410 MHz
WDW        EM
SSB         0
LB         1.00 Hz
GB         0
PC         1.40
    
```

<sup>1</sup>H NMR, <sup>13</sup>C NMR and <sup>19</sup>F NMR Spectra for Compounds 4I/6I

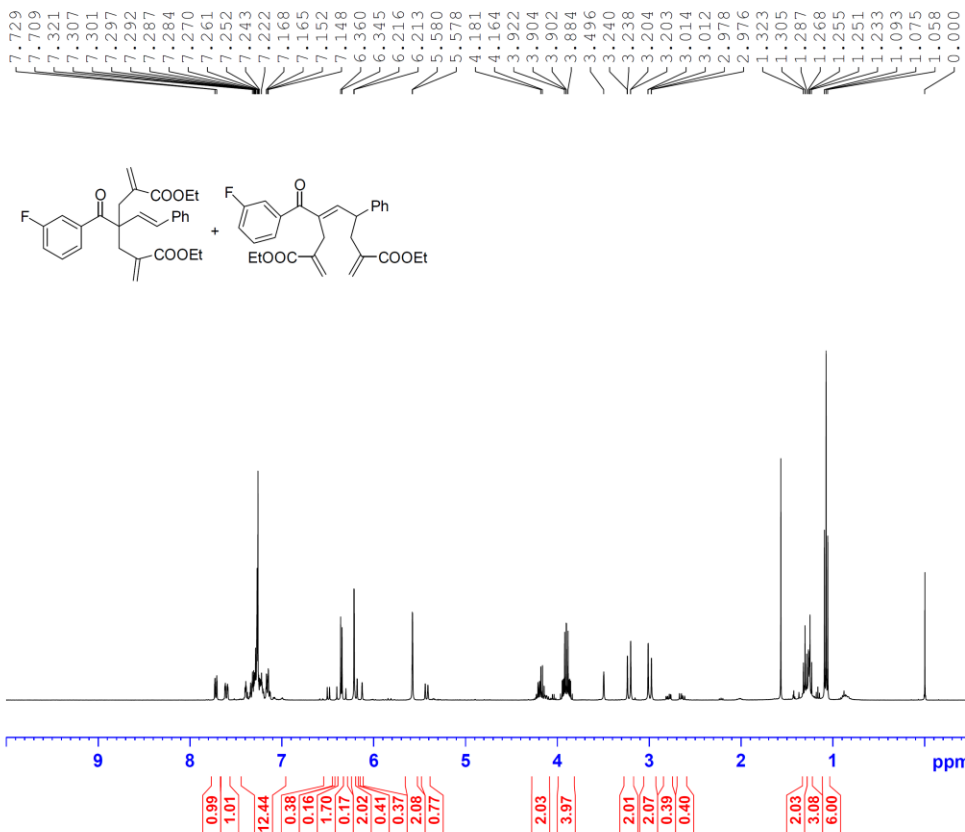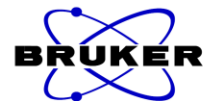

```

NAME      41+61-3-F-H
EXPNO    1
PROCNO   1
Date_    20221206
Time     15.44 h
INSTRUM  Avance Neo 400
PROBHD   Z116098_0847 (
PULPROG  zg30
TD        65536
SOLVENT  CDCl3
NS        8
DS        2
SWH       8196.722 Hz
FIDRES    0.250144 Hz
AQ        3.9977460 sec
RG        101
DW        61.000 usec
DE        13.54 usec
TE        298.1 K
D1        1.00000000 sec
TD0       1
SF01      400.1824711 MHz
NUC1      1H
P0        3.33 usec
P1        10.00 usec
SI        65536
SF        400.1800092 MHz
WDW       EM
SSB       0
LB        0.30 Hz
GB        0
PC        1.00
    
```

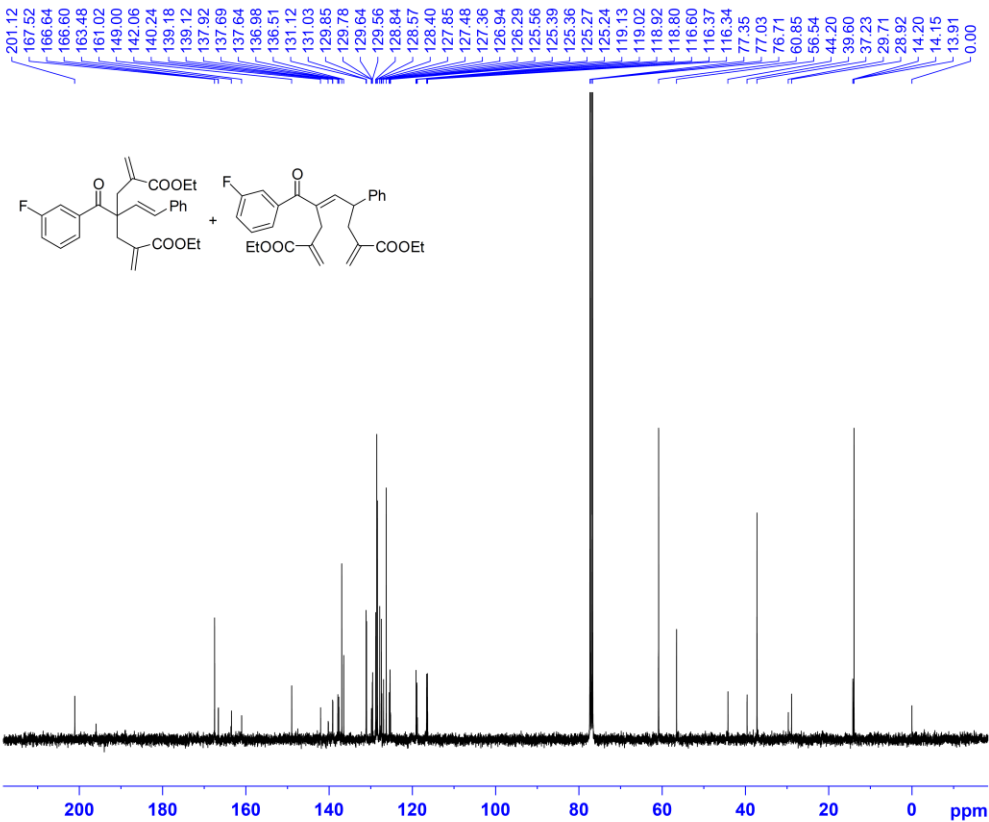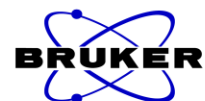

```

NAME      41+61-3-F-C
EXPNO    1
PROCNO   1
Date_    20230220
Time     22.21 h
INSTRUM  Avance Neo 400
PROBHD   Z116098_0847 (
PULPROG  zgpg30
TD        65536
SOLVENT  CDCl3
NS        512
DS        4
SWH       23809.523 Hz
FIDRES    0.726609 Hz
AQ        1.3763061 sec
RG        15.625
DW        21.000 usec
DE        6.50 usec
TE        298.1 K
D1        2.00000000 sec
D11       0.03000000 sec
TD0       1
SF01      100.6354036 MHz
NUC1      13C
P0        3.33 usec
P1        10.00 usec
SI        32768
SF        100.6253410 MHz
WDW       EM
SSB       0
LB        1.00 Hz
GB        0
PC        1.40
    
```

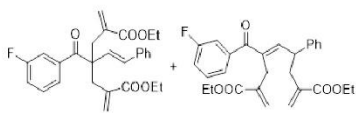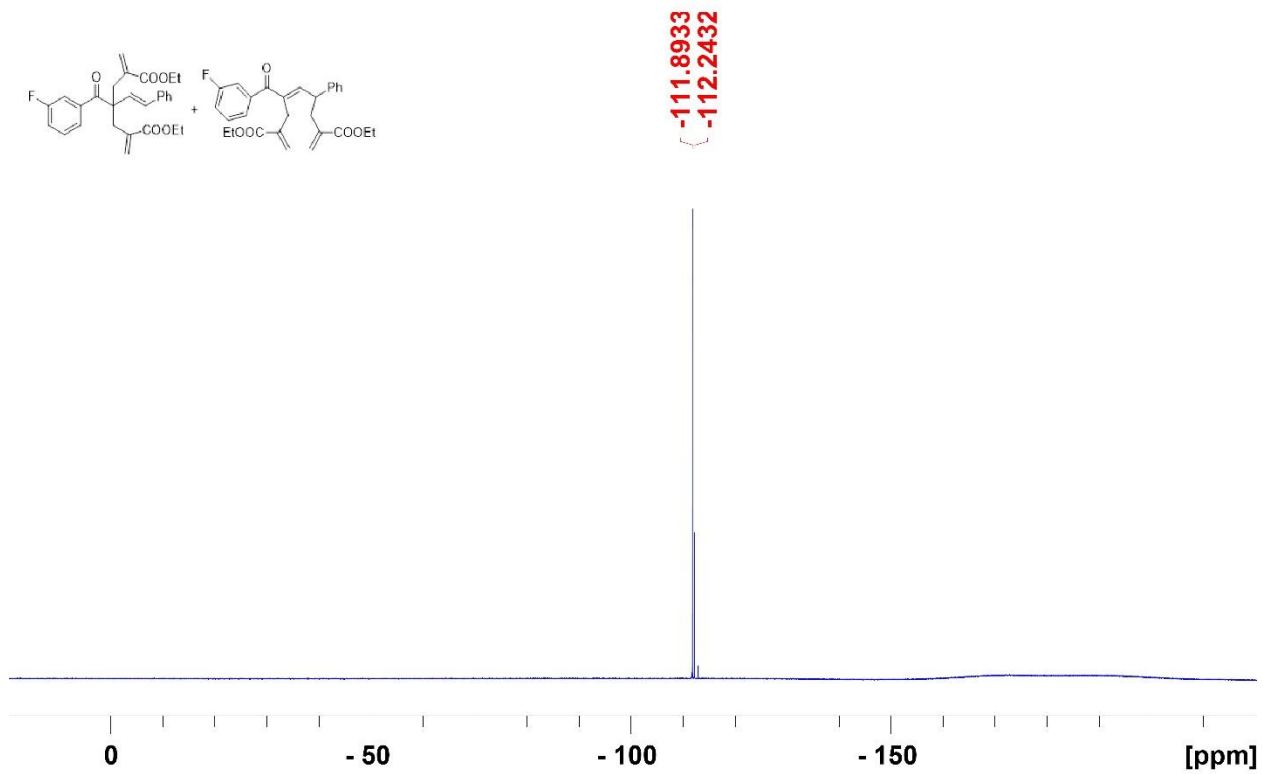

<sup>1</sup>H NMR and <sup>13</sup>C NMR Spectra for Compounds 4m/6m

7.873  
7.868  
7.892  
7.488  
7.299  
7.290  
7.287  
7.284  
7.280  
7.270  
7.261  
7.249  
7.243  
7.239  
7.236  
7.222  
7.167  
6.346  
6.340  
6.219  
6.216  
6.200  
6.197  
6.193  
5.584  
5.581  
4.198  
4.181  
4.164  
3.923  
3.921  
3.905  
3.903  
3.885  
3.485  
3.231  
3.195  
3.012  
2.977  
1.325  
1.308  
1.290  
1.269  
1.254  
1.252  
1.234  
1.165  
1.094  
1.076  
1.058  
0.000

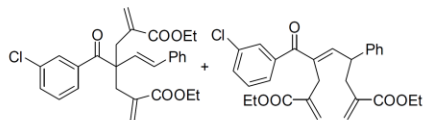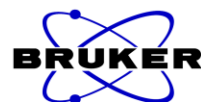

NAME 4m+6m-3-C1-H  
EXPNO 1  
PROCNO 1  
Date\_ 20221206  
Time\_ 15.49 h  
INSTRUM Avance Neo 400  
PROBHD Z116098\_0847 ( )  
PULPROG zg30  
TD 65536  
SOLVENT CDCl3  
NS 8  
DS 2  
SWH 8196.722 Hz  
FIDRES 0.250144 Hz  
AQ 3.9977460 sec  
RG 101  
DM 61.000 usec  
DE 13.54 usec  
TE 298.1 K  
D1 1.00000000 sec  
TDO 1  
SFO1 400.1824711 MHz  
NUC1 1H  
P0 3.33 usec  
P1 10.00 usec  
SI 65536  
SF 400.1800091 MHz  
WDW EM  
SSB 0  
LB 0.30 Hz  
GB 0  
PC 1.00

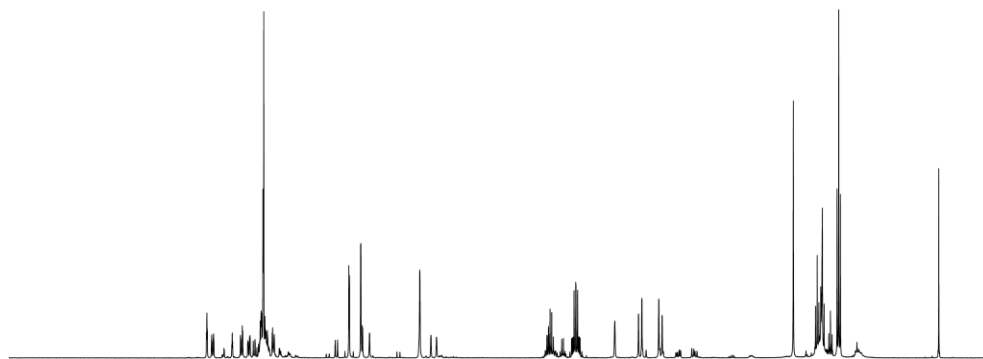

0.91  
0.95  
0.25  
0.50  
1.04  
0.98  
0.54  
9.93  
1.32  
0.40  
0.50  
1.81  
2.69  
0.58  
2.18  
1.08  
2.67  
0.70  
3.92  
0.97  
2.00  
0.16  
2.22  
0.53  
0.57  
2.65  
4.78  
1.19  
6.00

166.60  
149.19  
142.09  
139.78  
138.73  
137.93  
137.67  
137.16  
136.95  
136.53  
134.35  
133.60  
131.95  
131.88  
131.63  
131.13  
131.09  
129.65  
129.54  
129.22  
128.85  
128.70  
128.57  
128.45  
128.34  
128.12  
127.96  
127.85  
127.76  
127.70  
127.62  
127.46  
127.41  
127.20  
126.94  
126.28  
125.58  
77.35  
77.03  
76.71  
60.87  
56.54  
44.14  
39.72  
38.21  
37.29  
29.71  
28.89  
14.21  
14.16  
13.92  
0.01

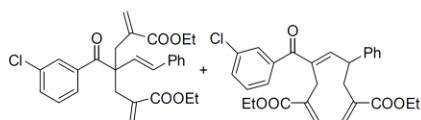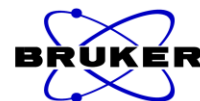

NAME 4m+6m-3-C1-C  
EXPNO 1  
PROCNO 1  
Date\_ 20230220  
Time\_ 22.54 h  
INSTRUM Avance Neo 400  
PROBHD Z116098\_0847 ( )  
PULPROG zg30  
TD 65536  
SOLVENT CDCl3  
NS 512  
DS 4  
SWH 23809.523 Hz  
FIDRES 0.726609 Hz  
AQ 1.3763061 sec  
RG 15.625  
DM 21.000 usec  
DE 6.50 usec  
TE 298.1 K  
D1 2.00000000 sec  
D11 0.03000000 sec  
TDO 1  
SFO1 100.6354036 MHz  
NUC1 13C  
P0 3.33 usec  
P1 10.00 usec  
SI 32768  
SF 100.6253410 MHz  
WDW EM  
SSB 0  
LB 1.00 Hz  
GB 0  
PC 1.40

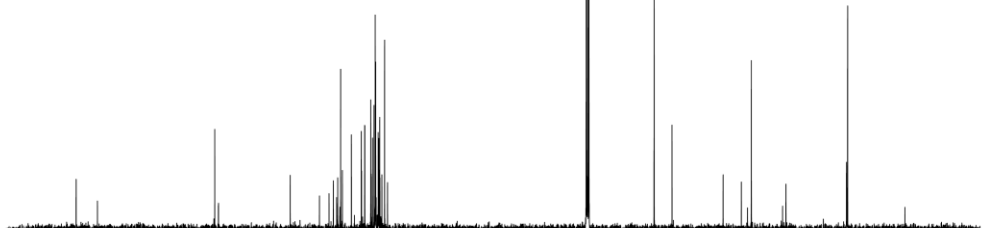

200  
180  
160  
140  
120  
100  
80  
60  
40  
20  
0 ppm

<sup>1</sup>H NMR and <sup>13</sup>C NMR Spectra for Compounds 4n/6n

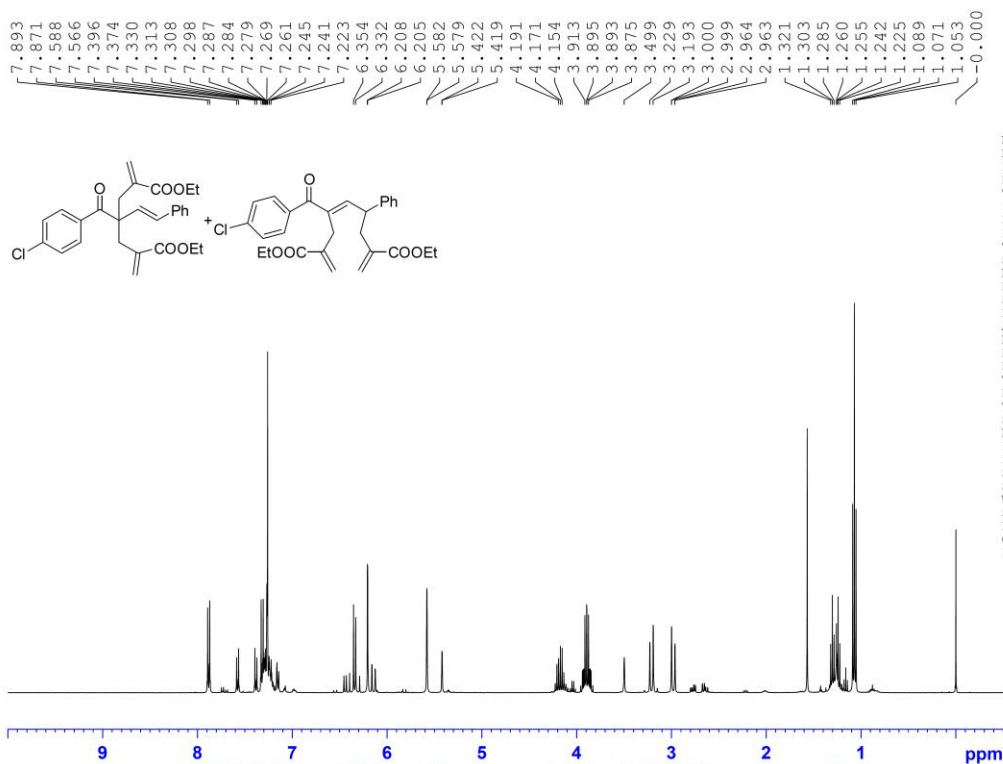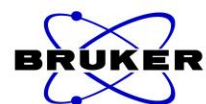

NAME 4n+6n-4-C1-H  
 EXPNO 1  
 PROCNO 1  
 Date\_ 20221206  
 Time\_ 15.53 h  
 INSTRUM Avance Neo 400  
 PROBHD Z116098\_0847 ( )  
 PULPROG zg30  
 TD 65536  
 SOLVENT CDCl3  
 NS 8  
 DS 2  
 SWH 8196.722 Hz  
 FIDRES 0.250144 Hz  
 AQ 3.9977460 sec  
 RG 101  
 DW 61.000 usec  
 DE 13.54 usec  
 TE 298.2 K  
 D1 1.00000000 sec  
 TDO 1  
 SFO1 400.1824711 MHz  
 NUC1 1H  
 PO 3.33 usec  
 P1 10.00 usec  
 SI 65536  
 SF 400.18000991 MHz  
 WDW EM  
 SSB 0  
 LB 0.30 Hz  
 GB 0  
 PC 1.00

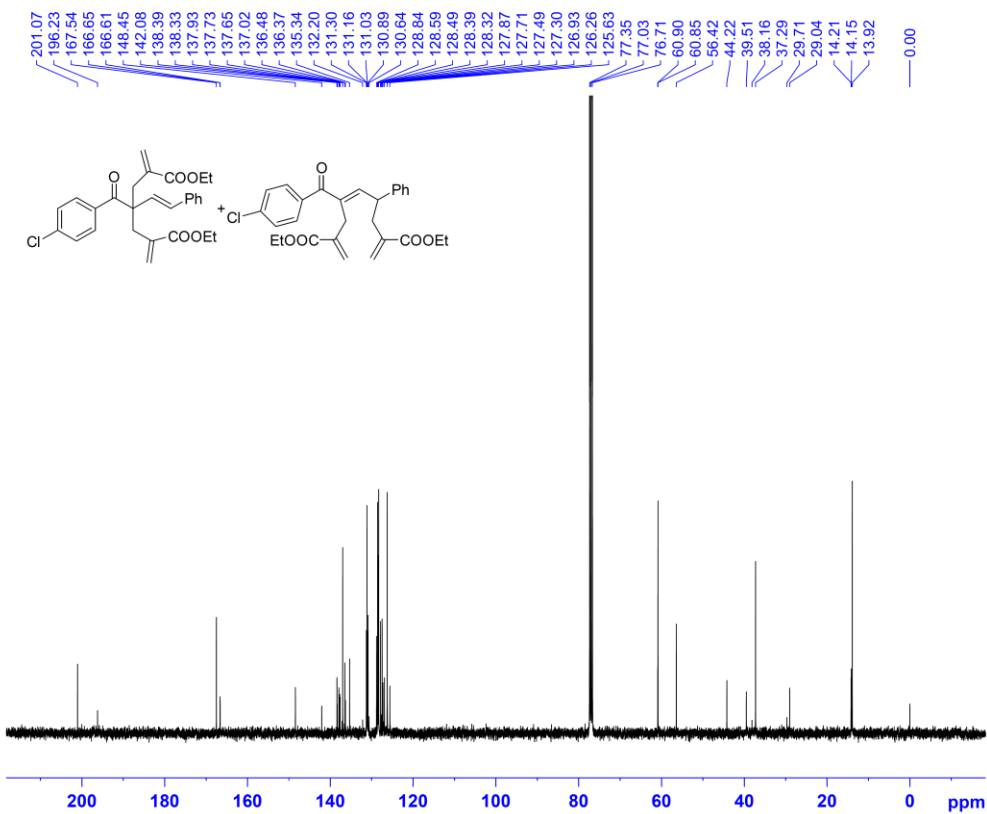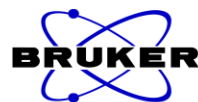

NAME 4n+6n-4-C1-C  
 EXPNO 1  
 PROCNO 1  
 Date\_ 20230220  
 Time\_ 23.28 h  
 INSTRUM Avance Neo 400  
 PROBHD Z116098\_0847 ( )  
 PULPROG zgpg30  
 TD 65536  
 SOLVENT CDCl3  
 NS 512  
 DS 4  
 SWH 23809.523 Hz  
 FIDRES 0.726609 Hz  
 AQ 1.3763061 sec  
 RG 15.625  
 DW 21.000 usec  
 DE 6.50 usec  
 TE 298.1 K  
 D1 2.00000000 sec  
 D11 0.03000000 sec  
 TDO 1  
 SFO1 100.6354036 MHz  
 NUC1 13C  
 PO 3.33 usec  
 P1 10.00 usec  
 SI 32768  
 SF 100.6253410 MHz  
 WDW EM  
 SSB 0  
 LB 1.00 Hz  
 GB 0  
 PC 1.40

<sup>1</sup>H NMR and <sup>13</sup>C NMR Spectra for Compounds 4o/6o

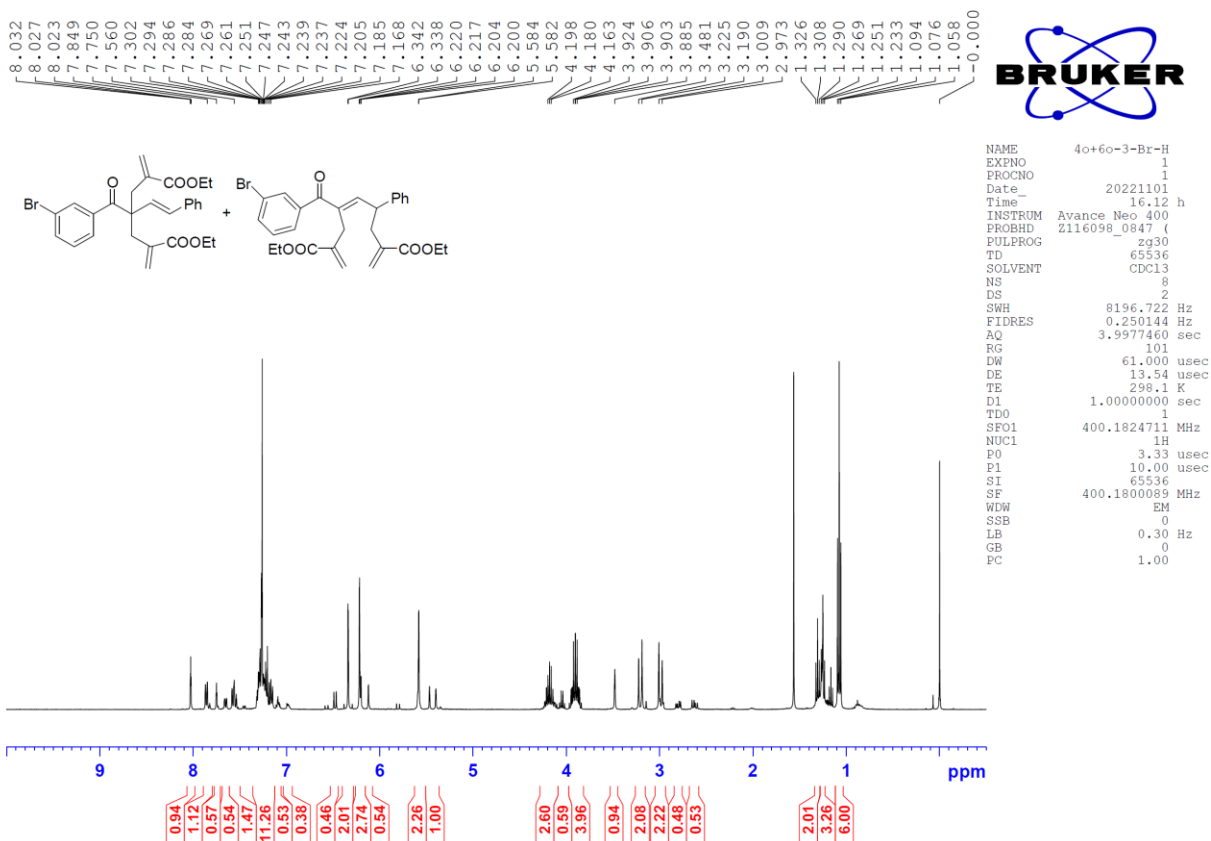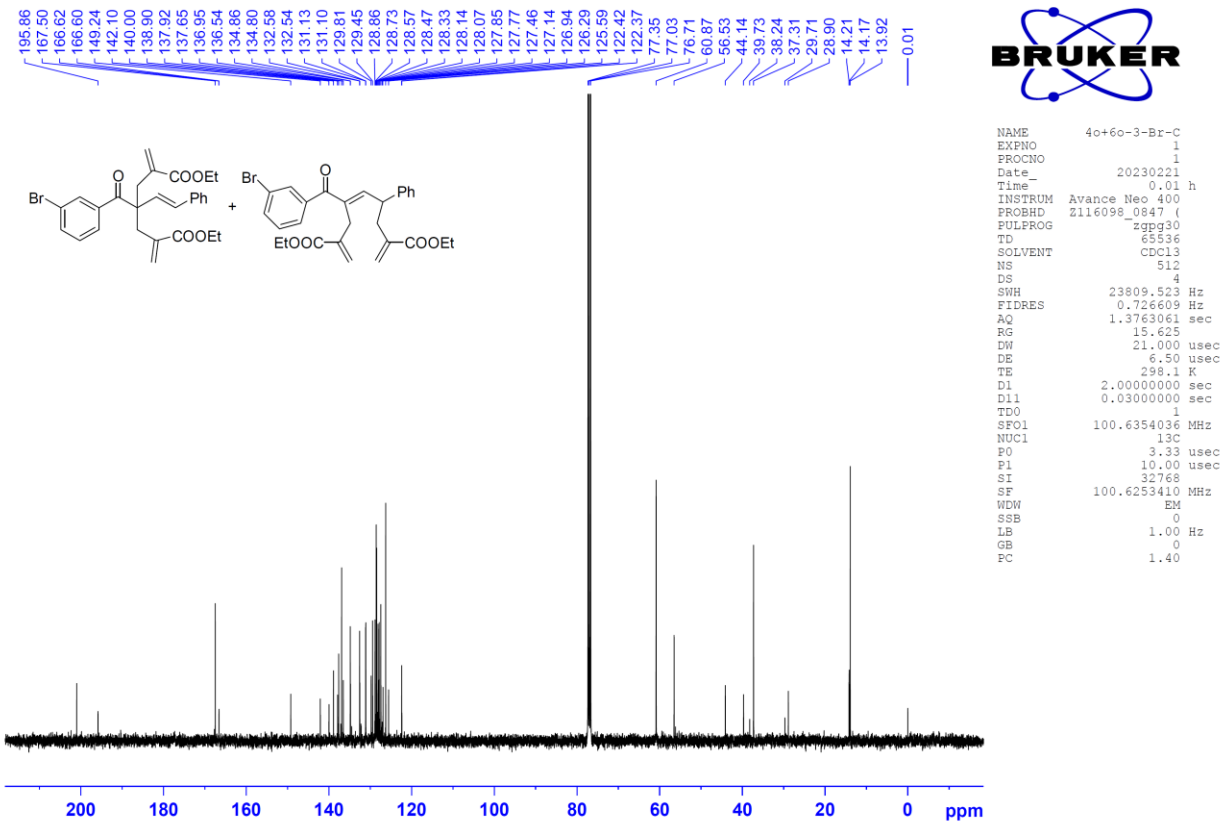



<sup>1</sup>H NMR, <sup>13</sup>C NMR and <sup>19</sup>F NMR Spectra for Compounds 4p/6p

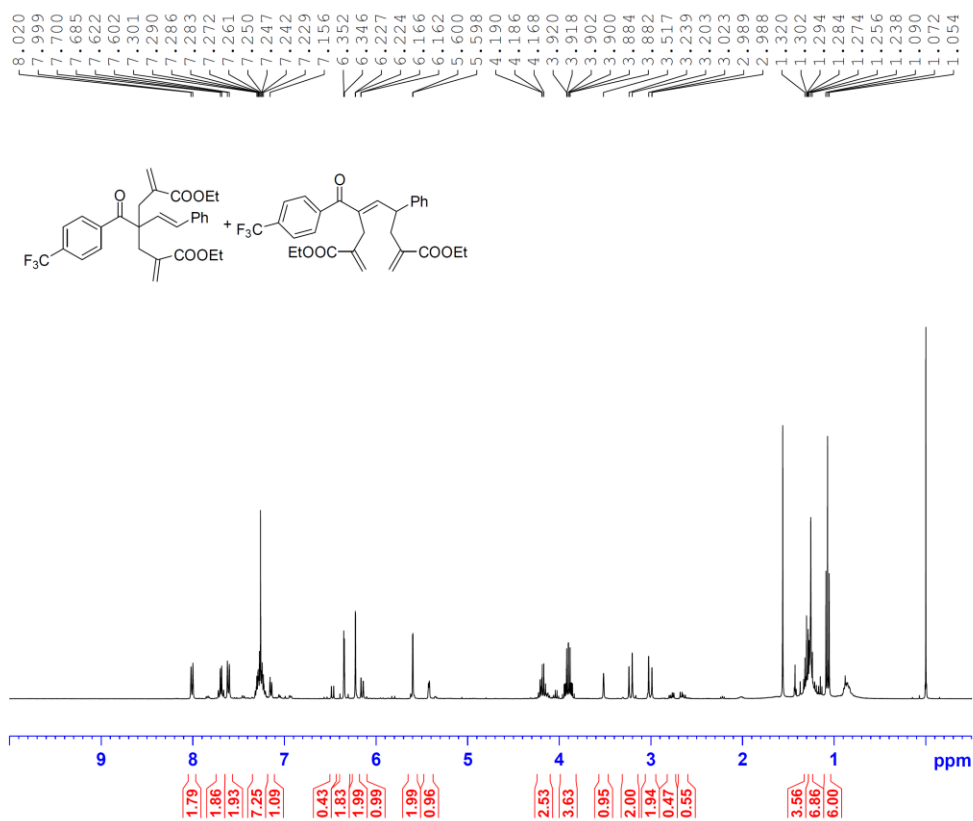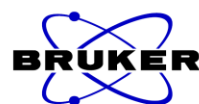

NAME 4p+6p-CF3-H  
 EXPNO 1  
 PROCNO 1  
 Date\_ 20230220  
 Time\_ 17.54 h  
 INSTRUM Avance Neo 400  
 PROBHD Z116098\_0847 f  
 PULPROG zg30  
 TD 65536  
 SOLVENT CDCl3  
 NS 8  
 DS 2  
 SWH 8196.722 Hz  
 FIDRES 0.250144 Hz  
 AQ 3.9977460 sec  
 RG 101  
 DW 61.000 usec  
 DE 13.54 usec  
 TE 298.2 K  
 D1 1.00000000 sec  
 TD0  
 SF01 400.1824711 MHz  
 NUC1 1H  
 P0 3.33 usec  
 P1 10.00 usec  
 SI 65536  
 SF 400.1800089 MHz  
 WDW EM  
 SSB 0  
 LB 0.30 Hz  
 GB 0  
 PC 1.00

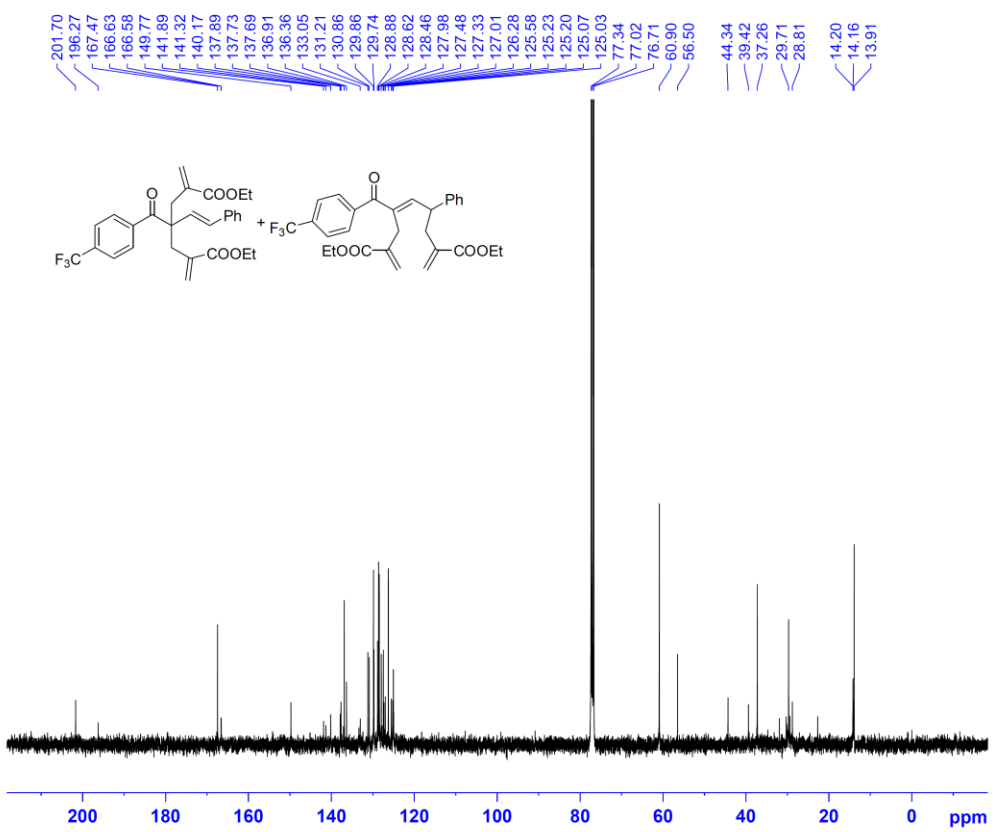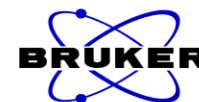

NAME 4p+6p-CF3-C  
 EXPNO 1  
 PROCNO 1  
 Date\_ 20230309  
 Time\_ 17.59 h  
 INSTRUM Avance Neo 400  
 PROBHD Z116098\_0847 f  
 PULPROG zgpg30  
 TD 65536  
 SOLVENT CDCl3  
 NS 512  
 DS 4  
 SWH 23809.523 Hz  
 FIDRES 0.726609 Hz  
 AQ 1.3763061 sec  
 RG 15.625  
 DW 21.000 usec  
 DE 6.50 usec  
 TE 298.2 K  
 D1 2.00000000 sec  
 D11 0.03000000 sec  
 TD0 1  
 SF01 100.6354036 MHz  
 NUC1 13C  
 P0 3.33 usec  
 P1 10.00 usec  
 SI 32768  
 SF 100.6253410 MHz  
 WDW EM  
 SSB 0  
 LB 1.00 Hz  
 GB 0  
 PC 1.40

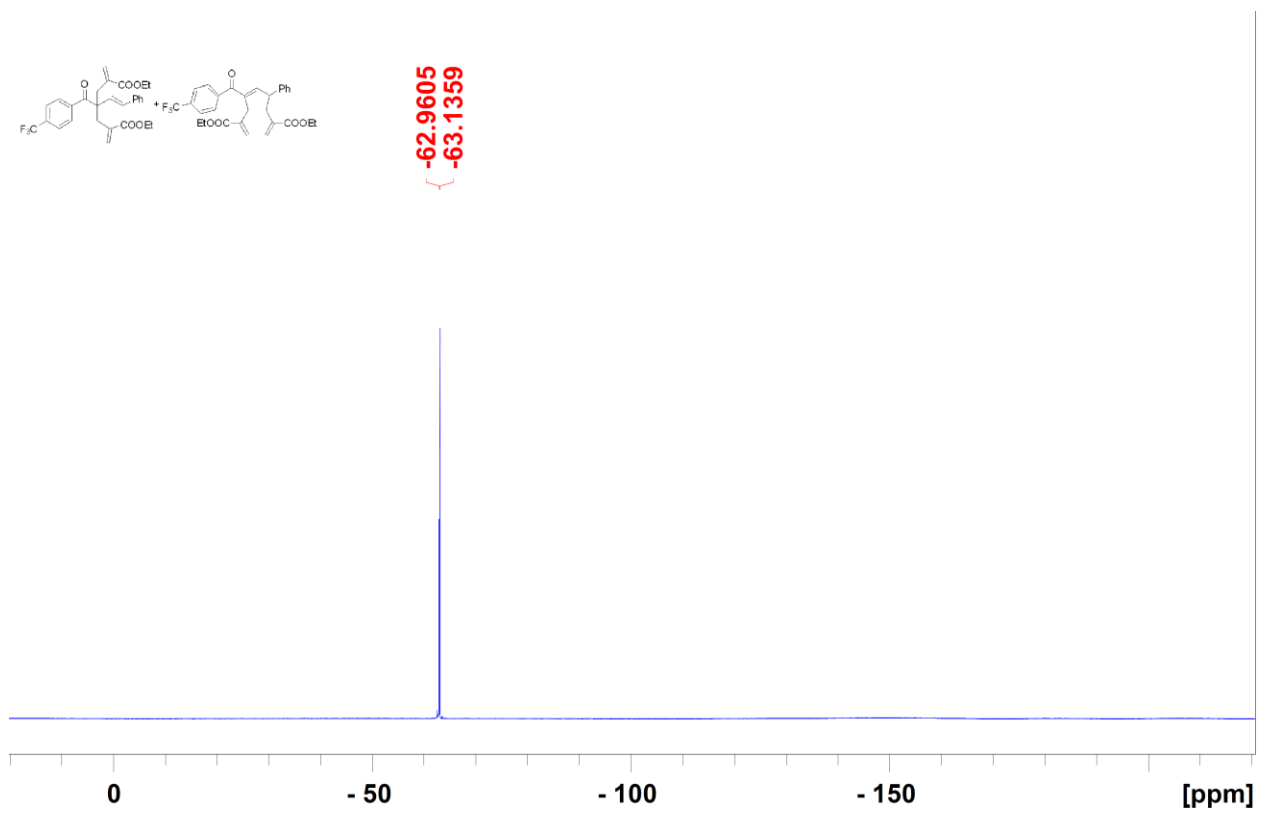

## X. Copes of HRMS for all new compounds

### HRMS for Compound 3a

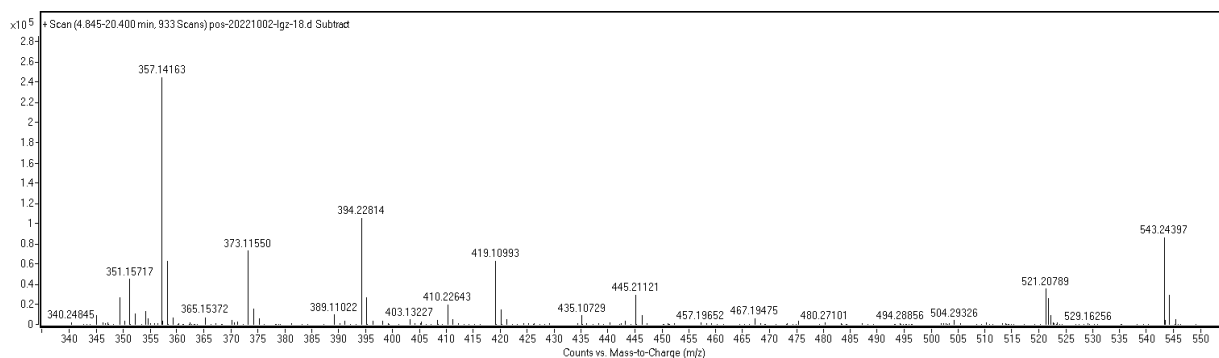

### HRMS for Compound 3b

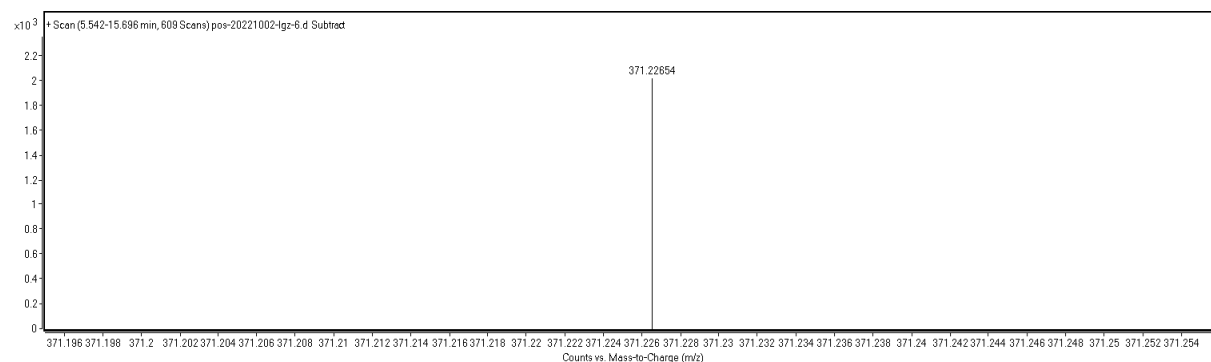

### HRMS for Compound 3c

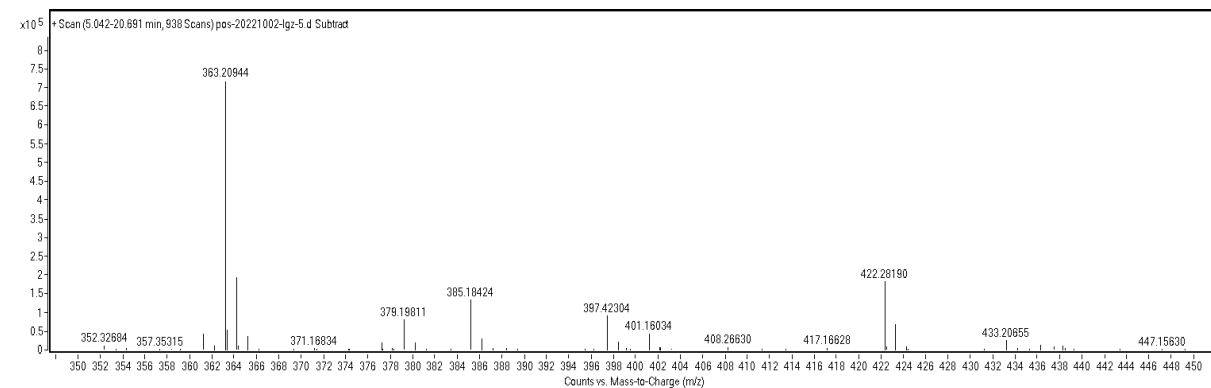

### HRMS for Compound 3d

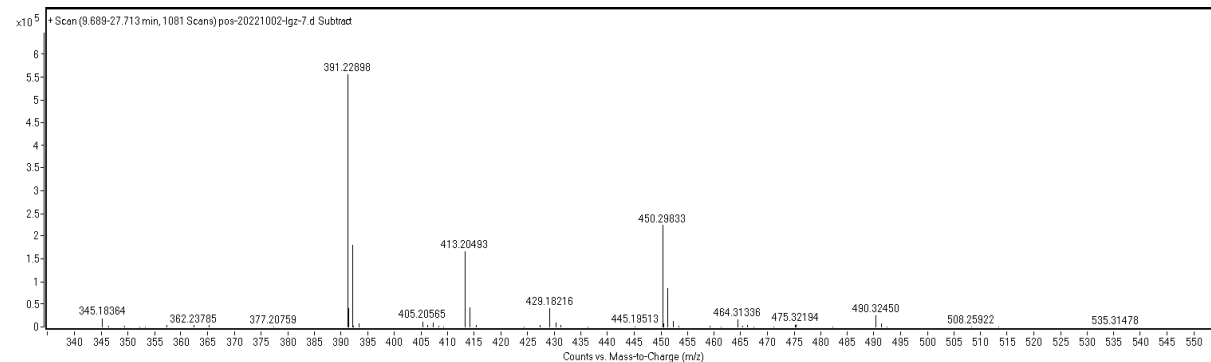

### HRMS for Compound 3e

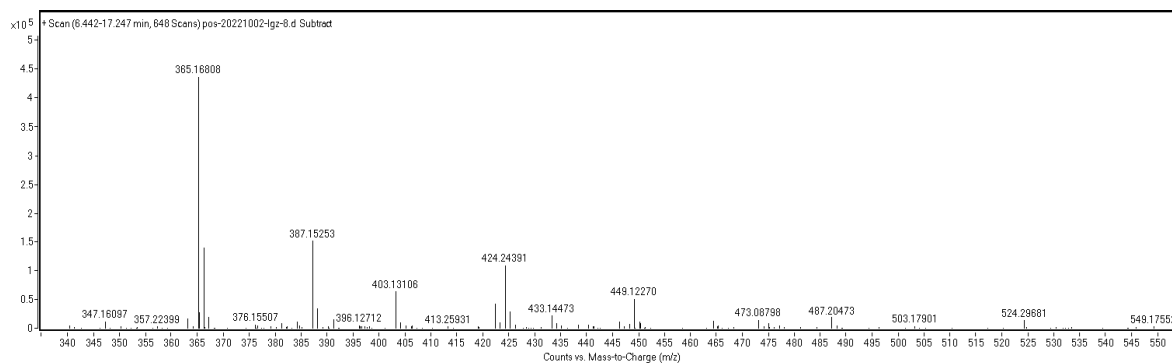

### HRMS for Compound 3f

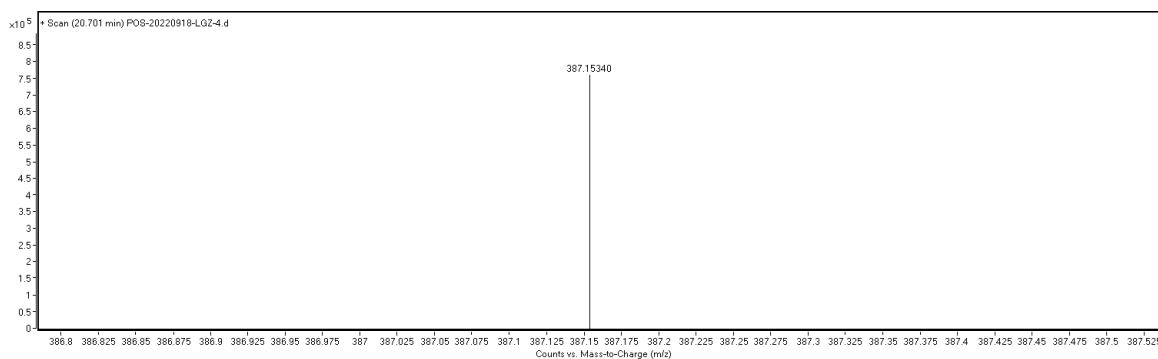

### HRMS for Compound 3g

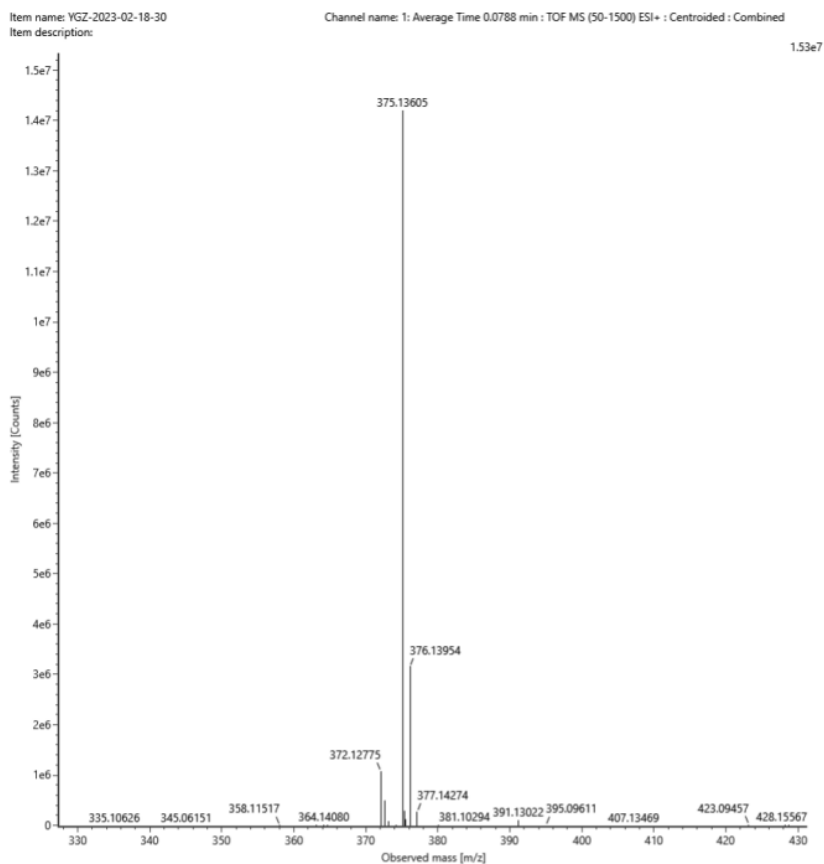

### HRMS for Compound 3h

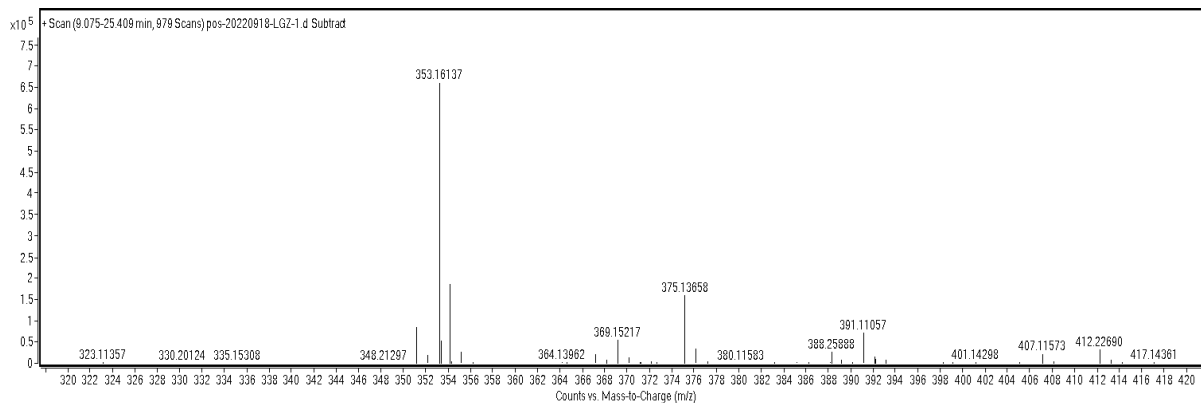

### HRMS for Compound 3i

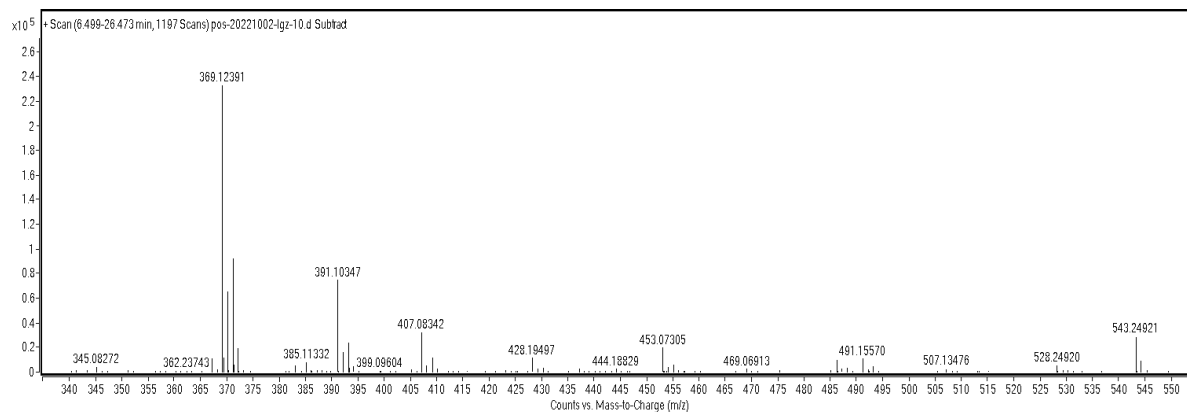

### HRMS for Compound 3j

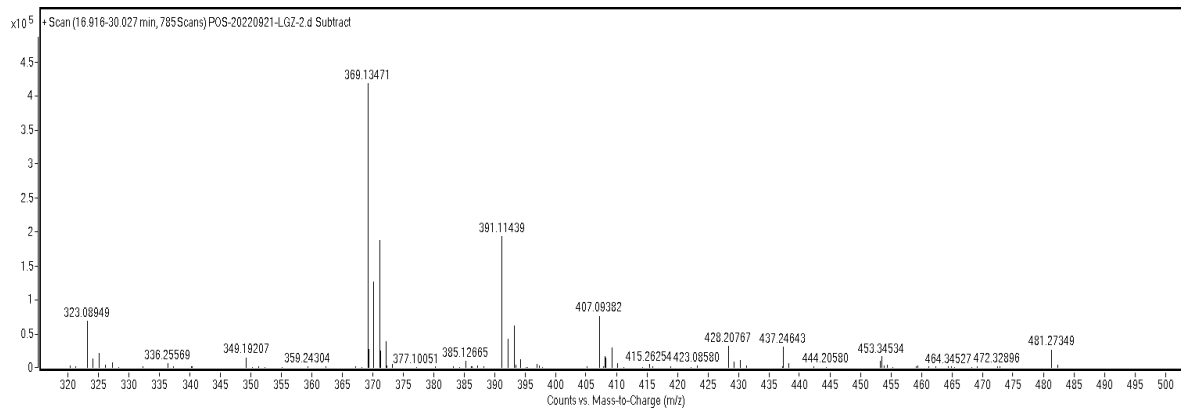

### HRMS for Compound 3k

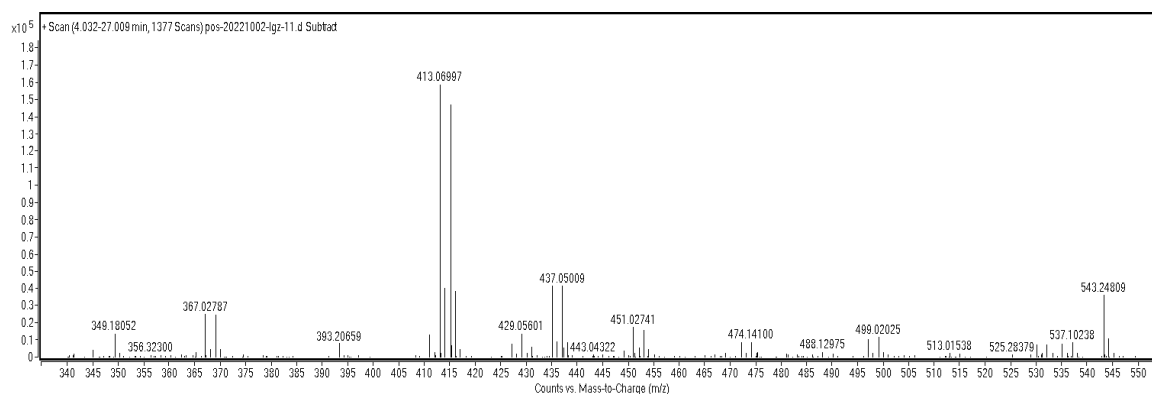

### HRMS for Compound 3l

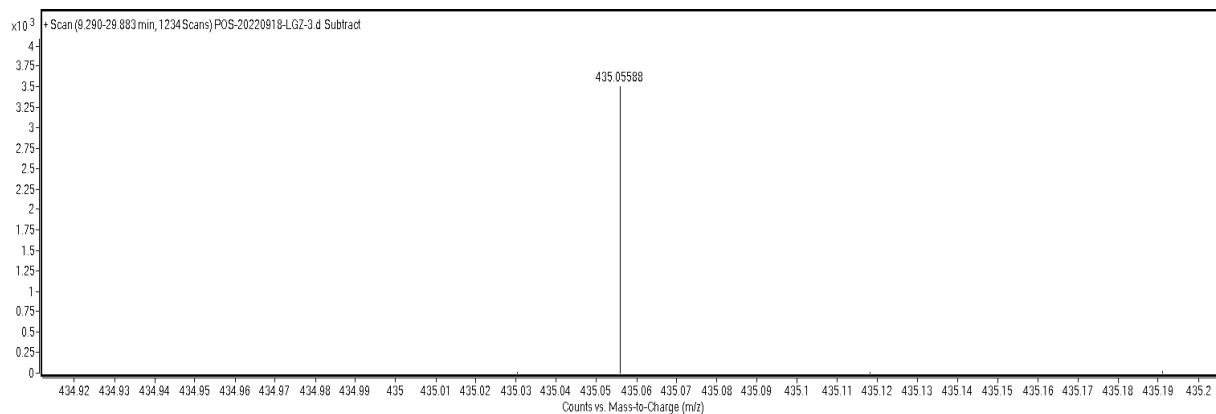

### HRMS for Compound 3m

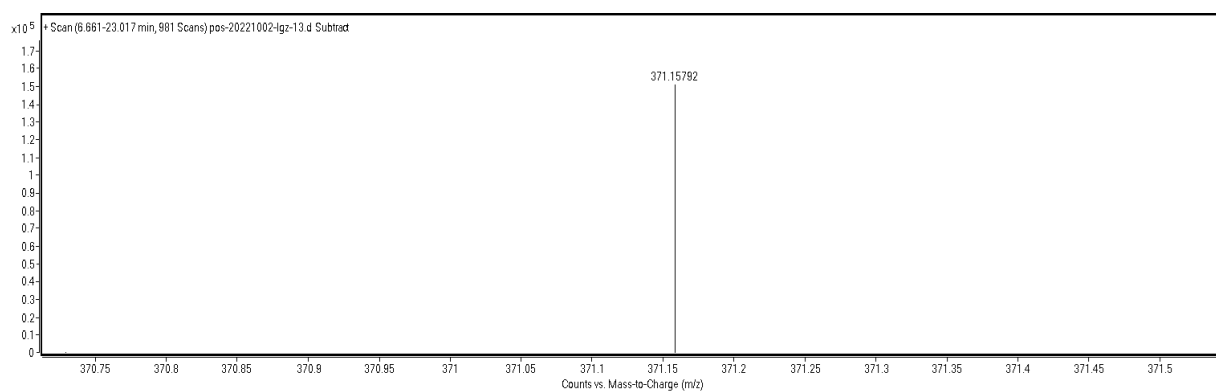

### HRMS for Compound 3n

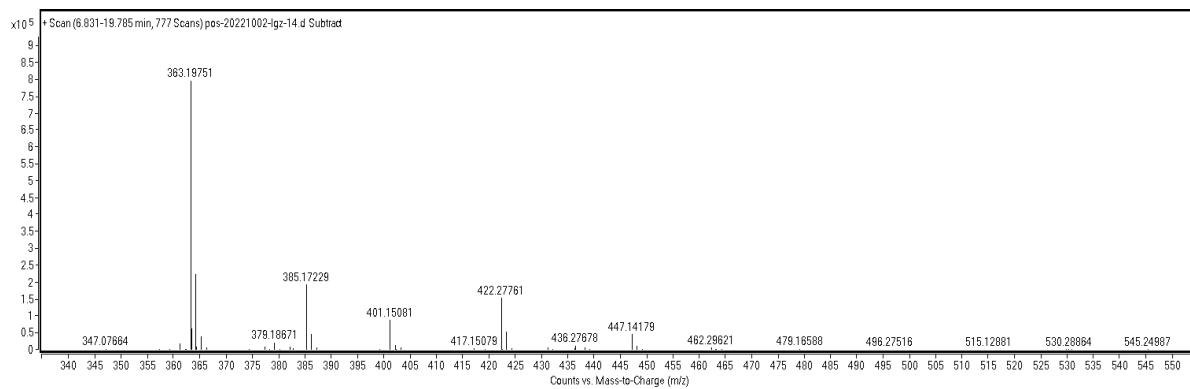

### HRMS for Compound 3o

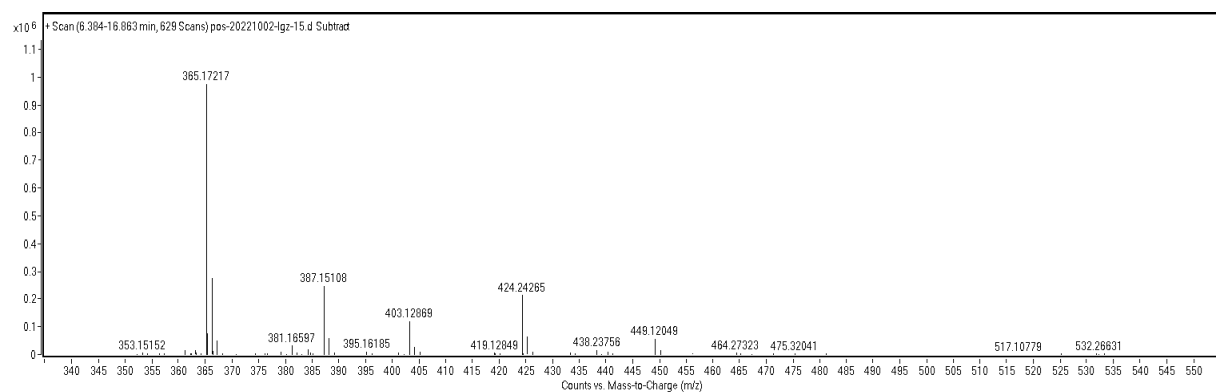

### HRMS for Compound 3p

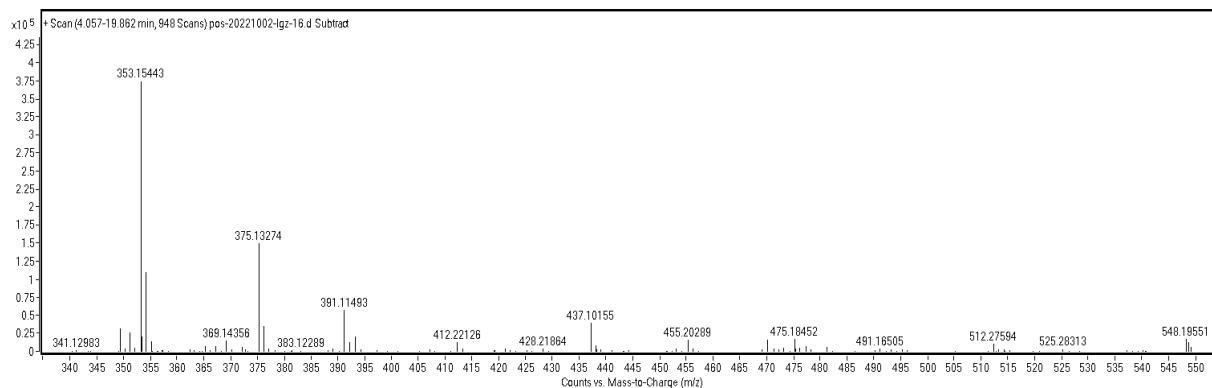

### HRMS for Compound 3q

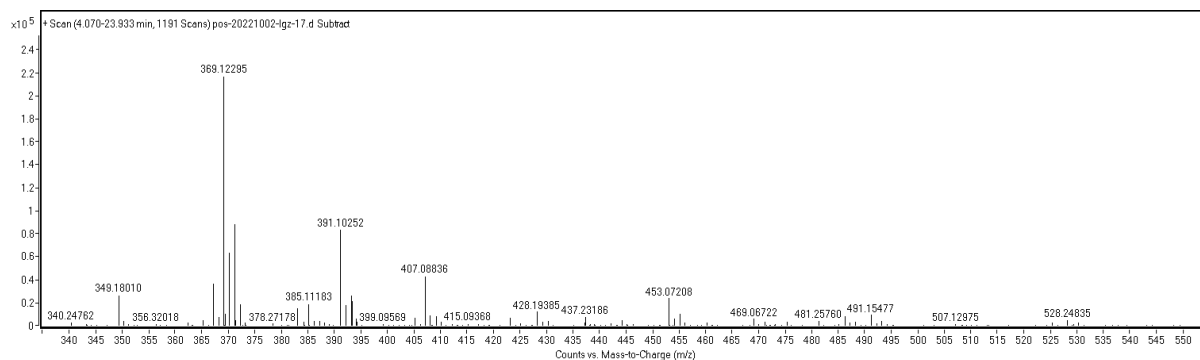

### HRMS for Compound 3r

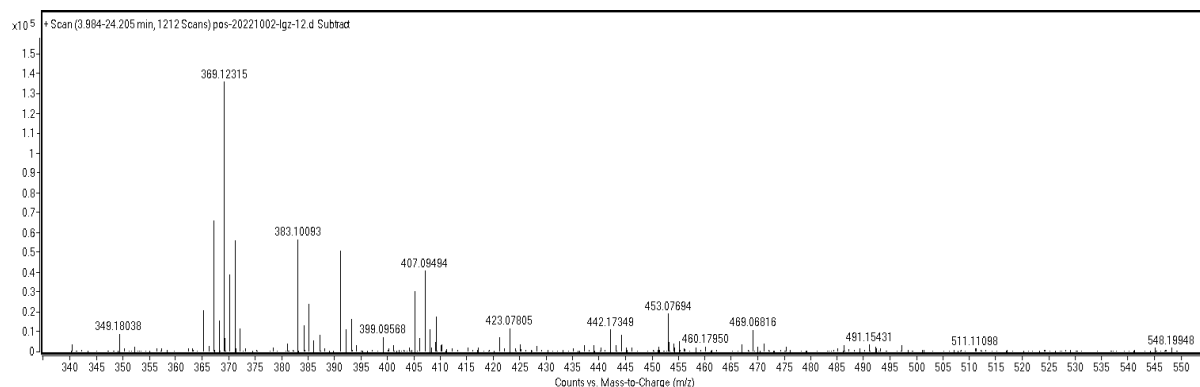

### HRMS for Compound 3s

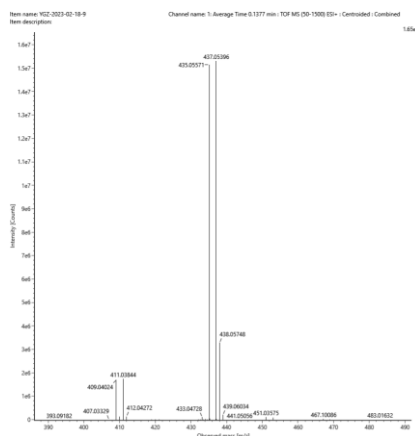

## HRMS for Compound 3t

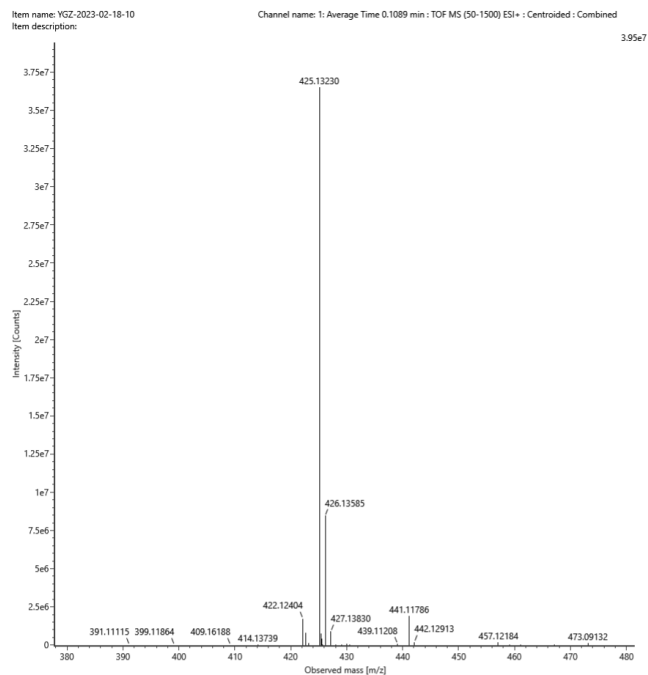

## HRMS for Compound 5a

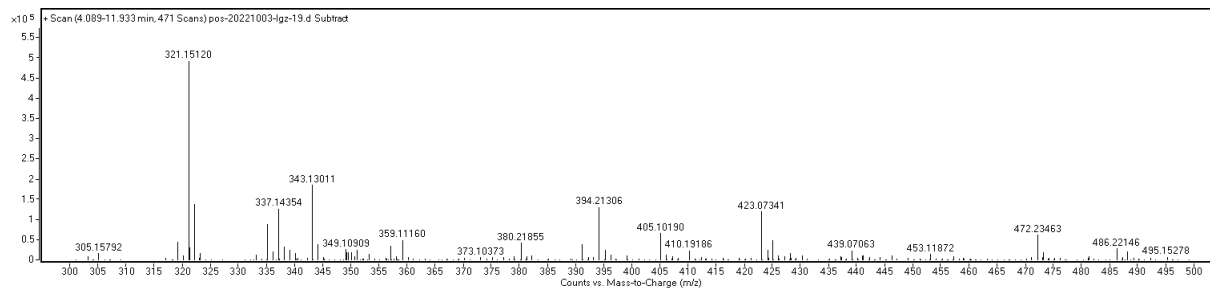

## HRMS for Compound 5b

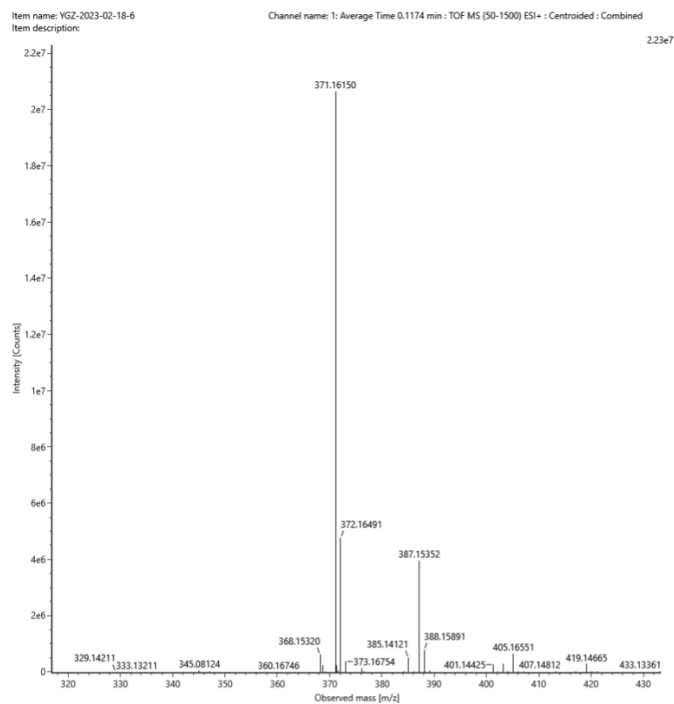



## HRMS for Compound 5c

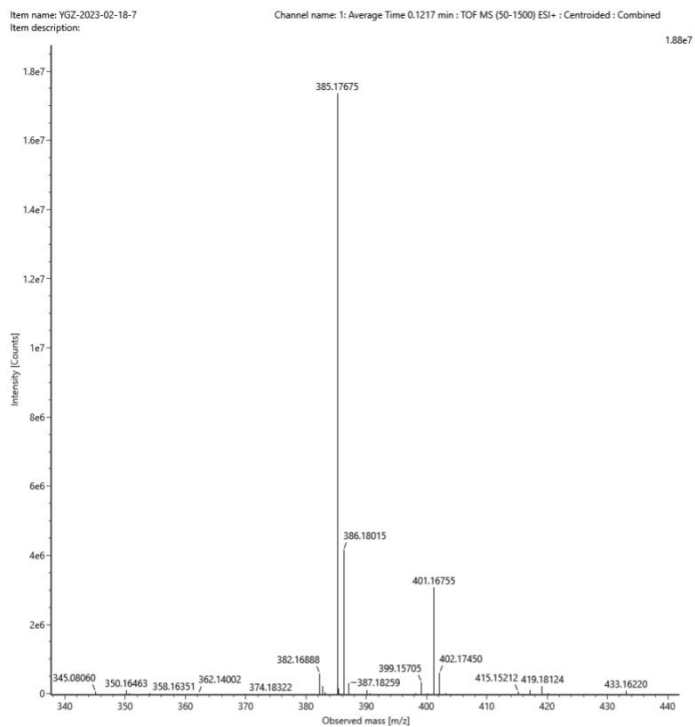

## HRMS for Compound 5d

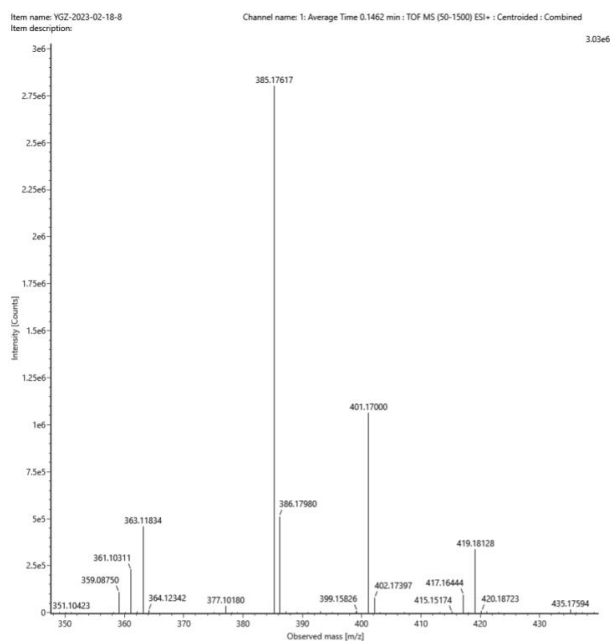

## HRMS for Compound 5e

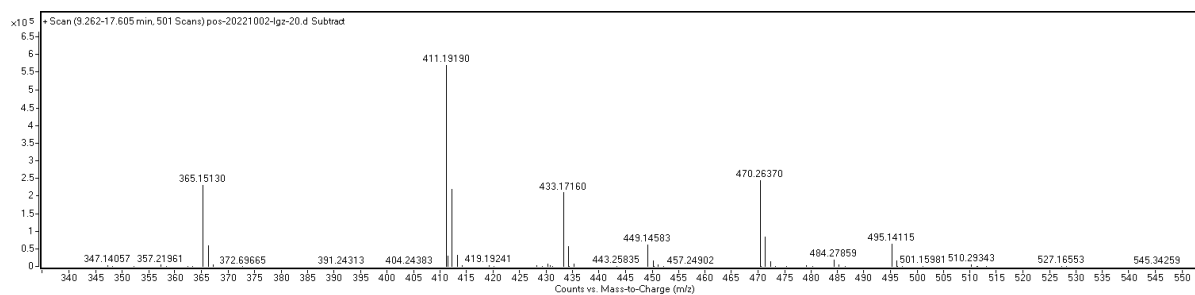

### HRMS for Compound 5f

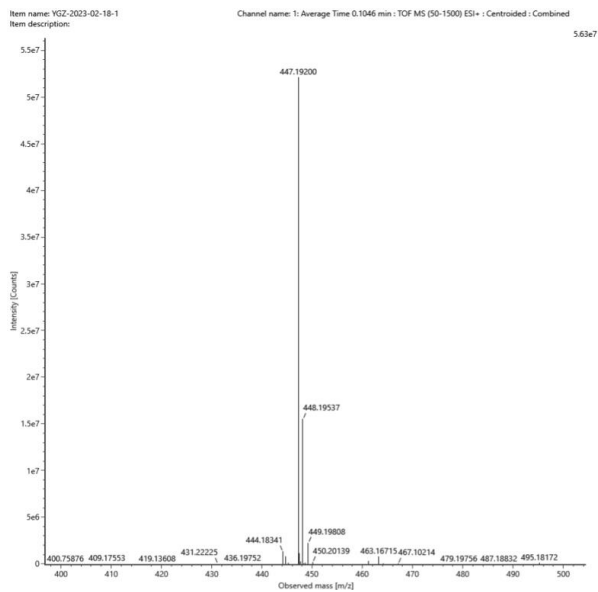

### HRMS for Compound 5g

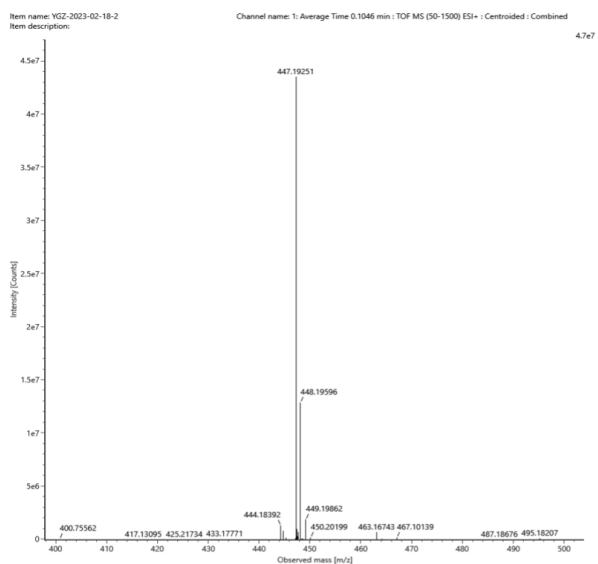

### HRMS for Compound 5h

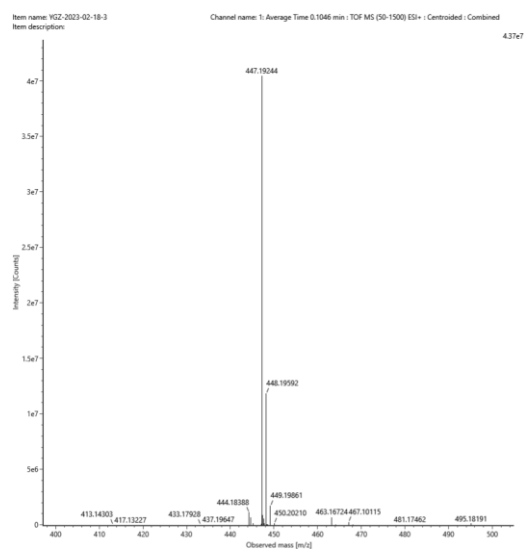

## HRMS for Compound 5i

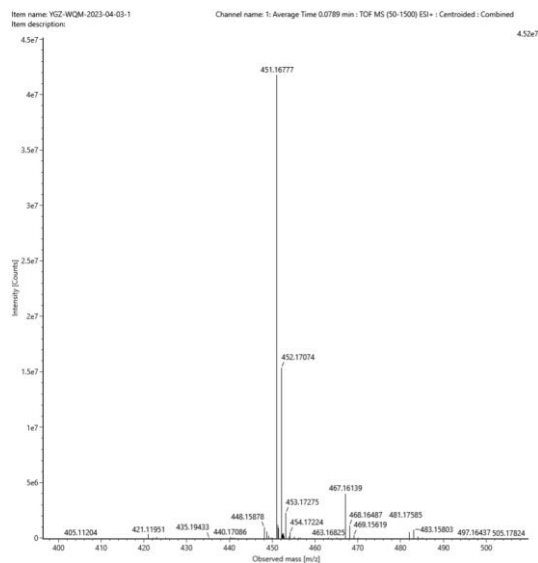

## HRMS for Compound 5j

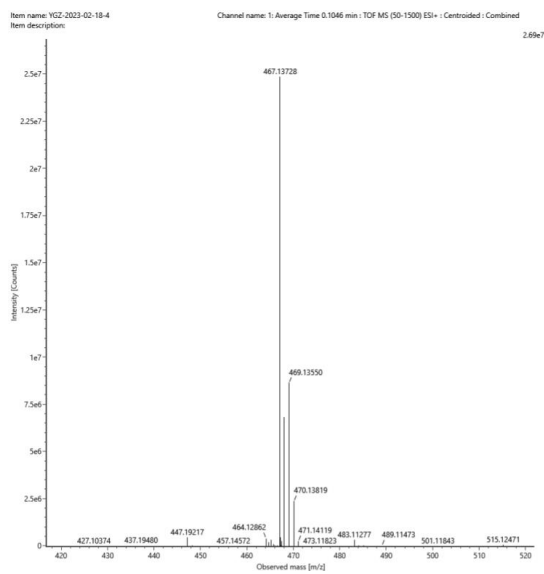

## HRMS for Compound 5k

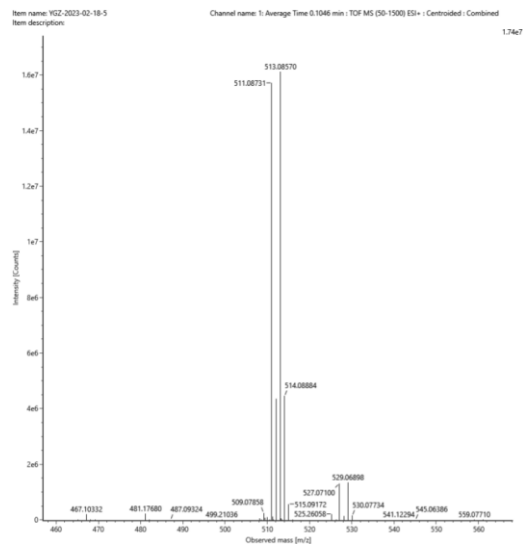

### HRMS for Compound 4a

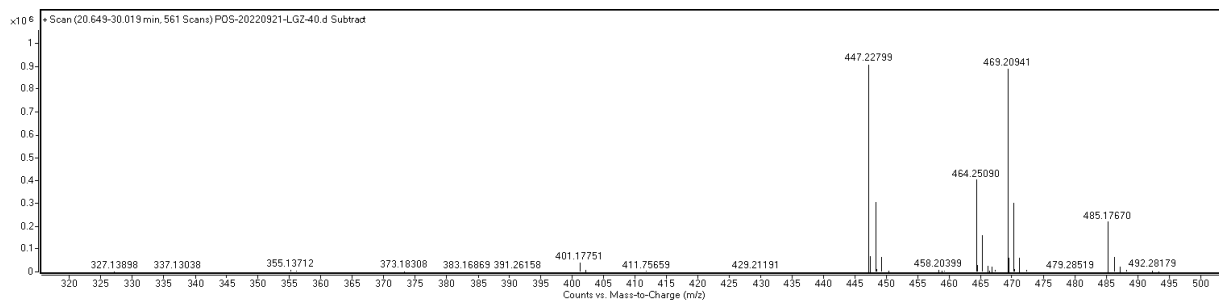

### HRMS for Compound 6a

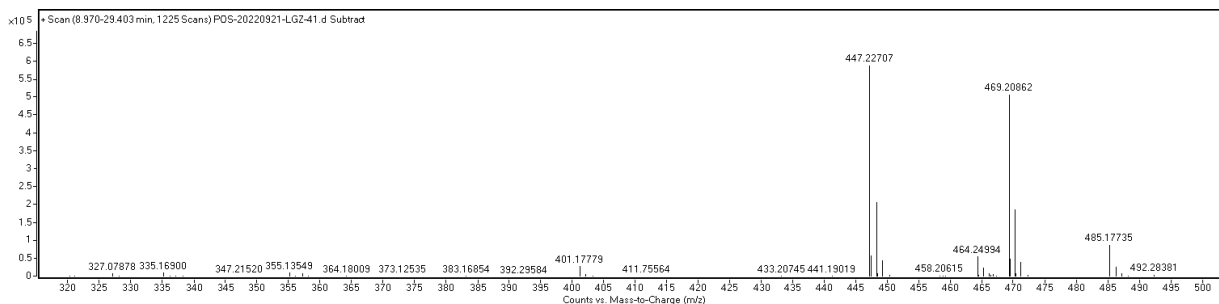

### HRMS for Compound 4b

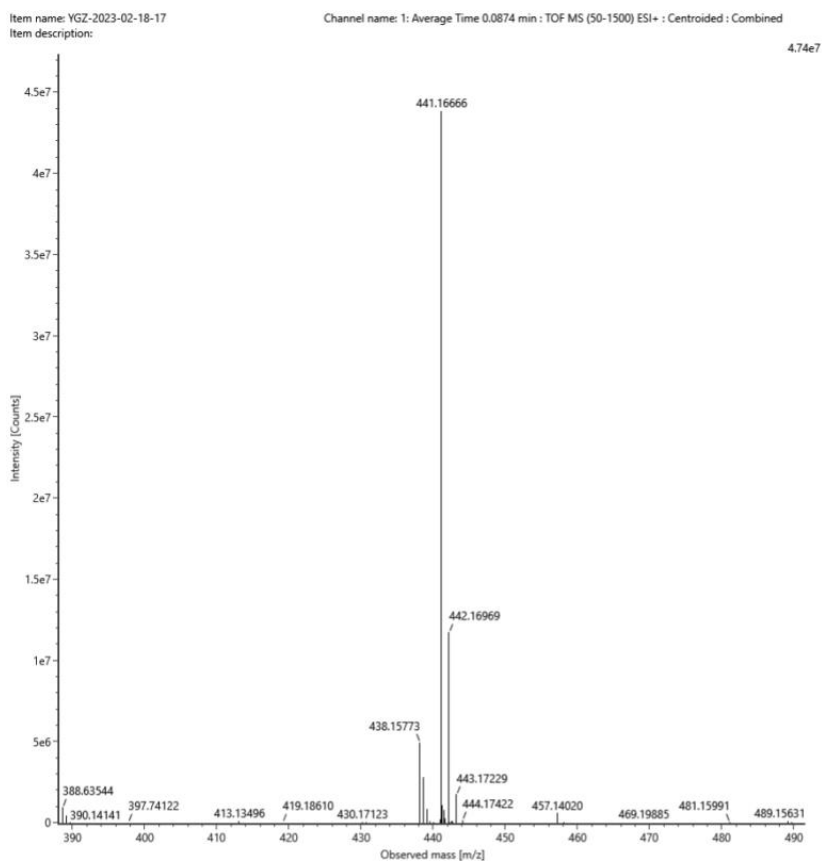

## HRMS for Compound 6b

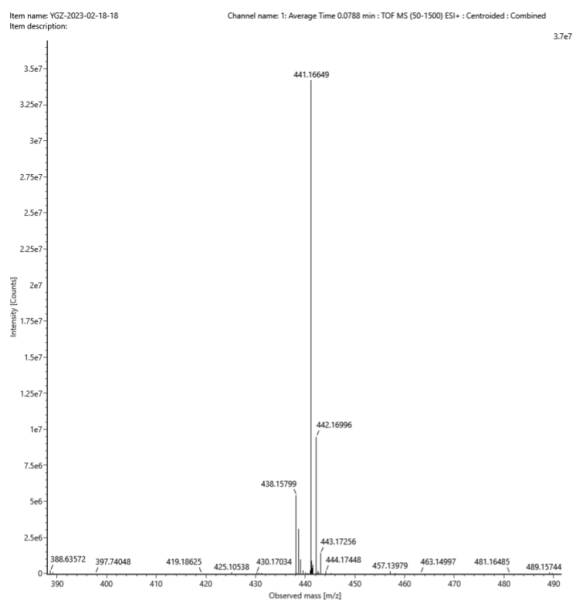

## HRMS for Compound 4c

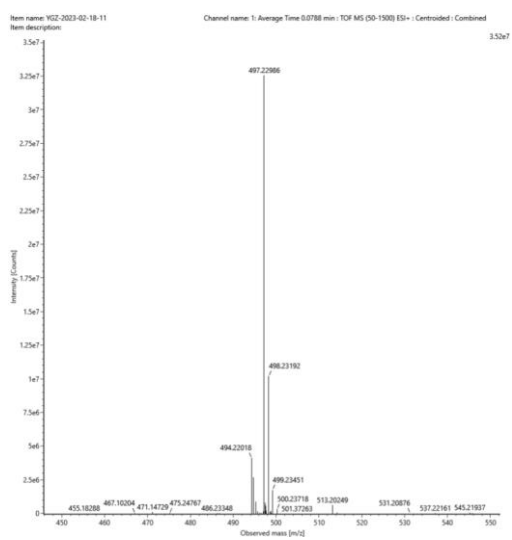

## HRMS for Compound 6c

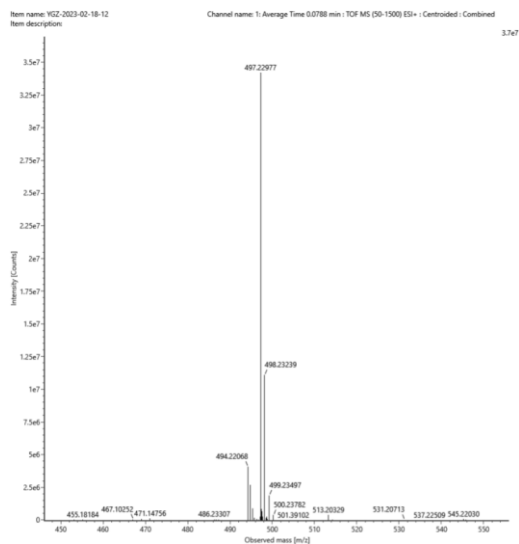

### HRMS for Compound 4d

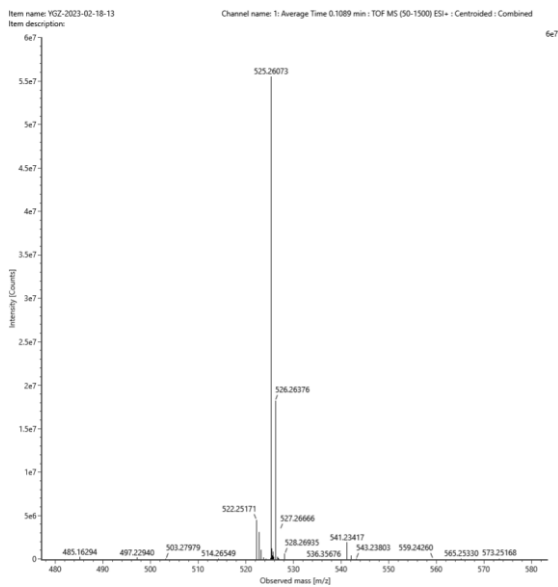

### HRMS for Compound 6d

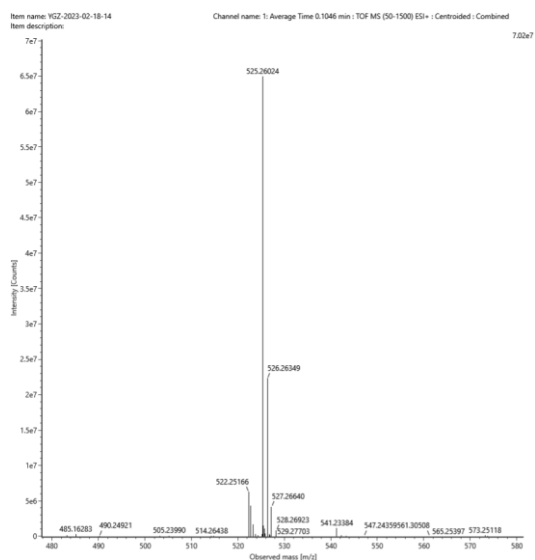

### HRMS for Compound 4e

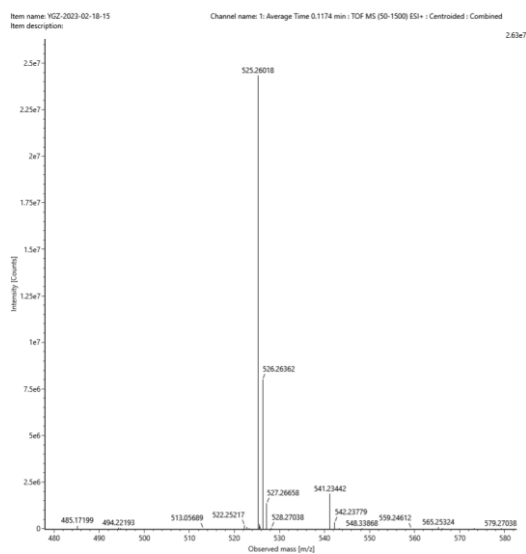

## HRMS for Compound 6e

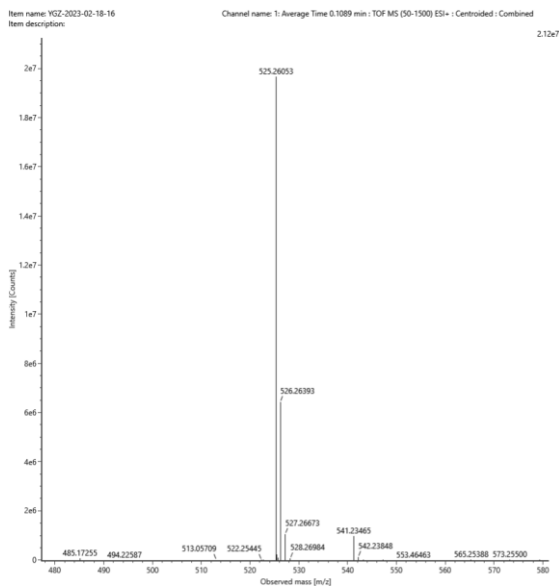

## HRMS for Compound 4f

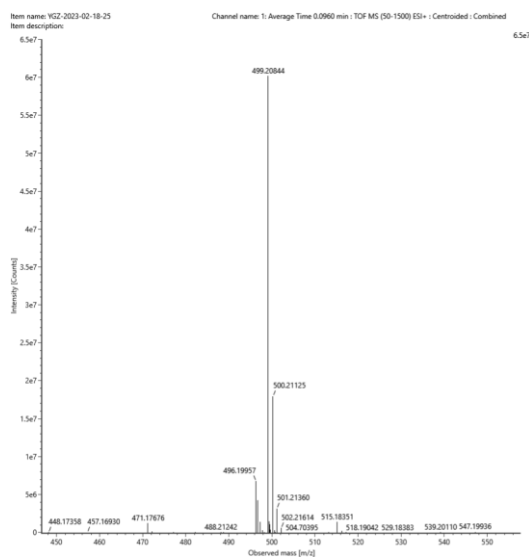

## HRMS for Compound 4h

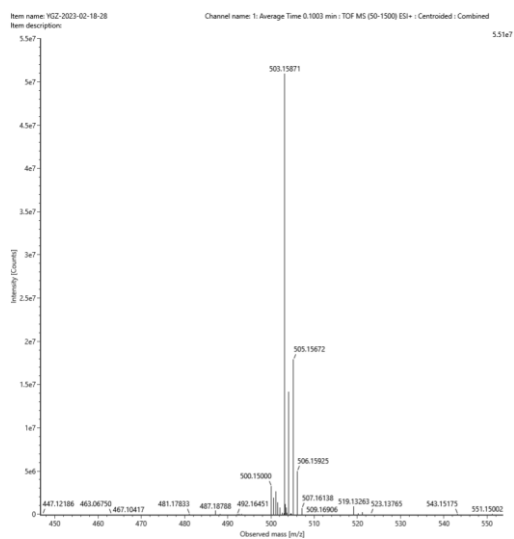

### HRMS for Compound 4i

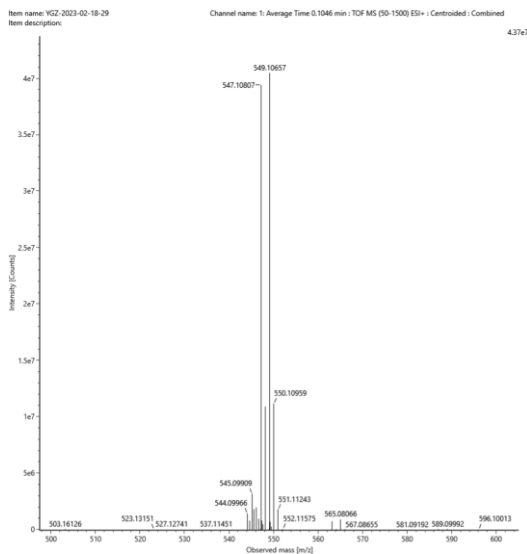

### HRMS for Compound 6i

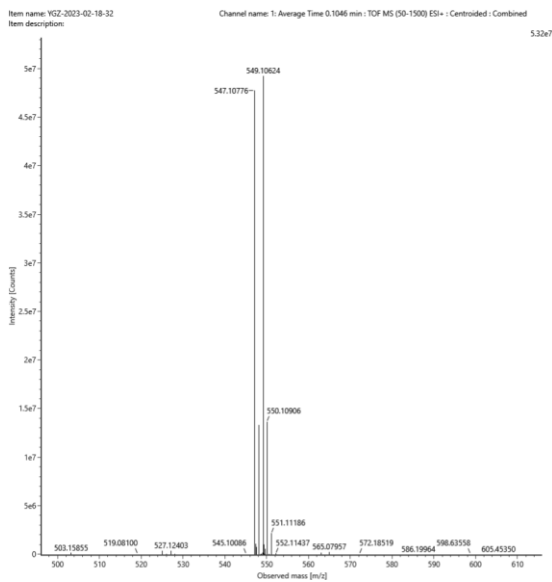

### HRMS for Compounds 4k/6k

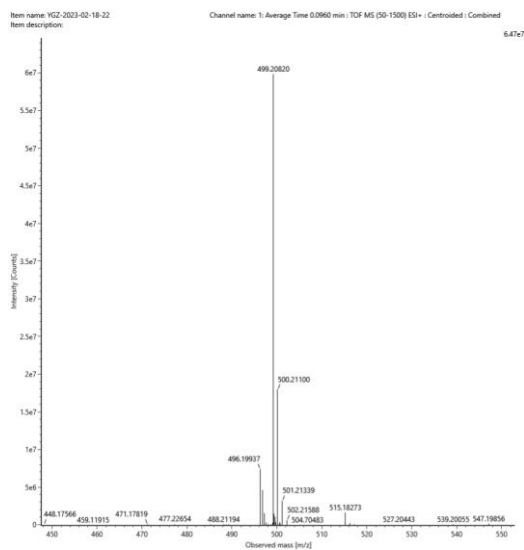



## HRMS for Compounds 4l/6l

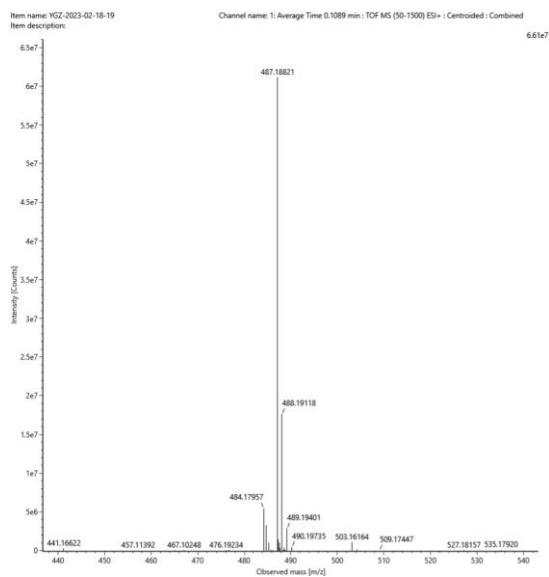

## HRMS for Compounds 4m/6m

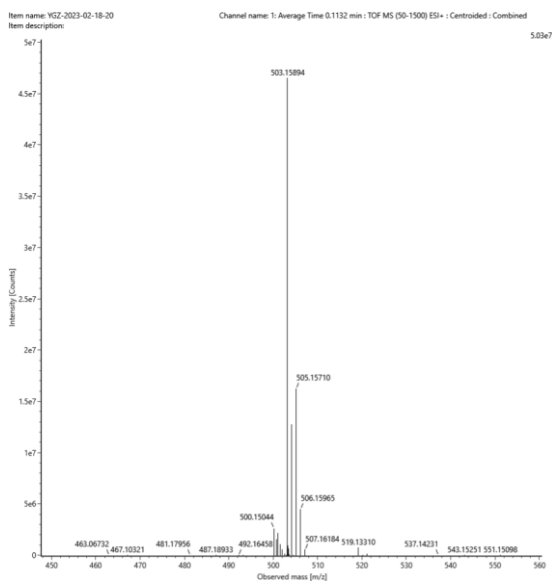

## HRMS for Compounds 4n/6n

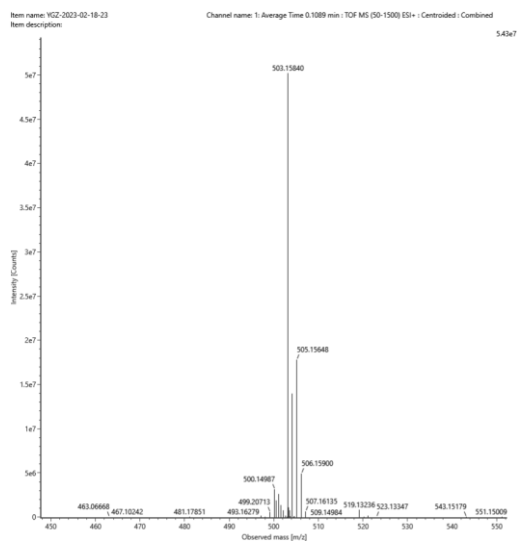

## HRMS for Compounds 4o/6o

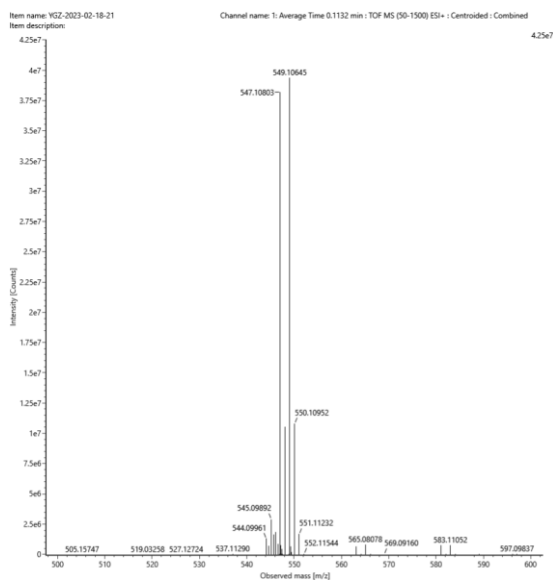

## HRMS for Compounds 4p/6p

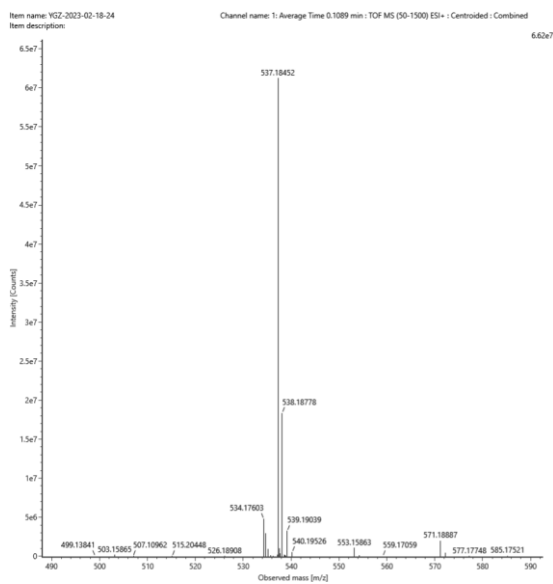





---

The following ALERTS were generated. Each ALERT has the format

**test-name\_ALERT\_alert-type\_alert-level.**

Click on the hyperlinks for more details of the test.

---

● **Alert level C**

PLAT601\_ALERT\_2\_C Unit Cell Contains Solvent Accessible VOIDS of . 47 Ang\*\*3  
PLAT911\_ALERT\_3\_C Missing FCF Refl Between Thmin & STh/L= 0.600 20 Report  
2 0 0, 4 0 0, 2 4 0, 1 5 0, 0 6 0, 0 1 1,  
2 1 1, -3 2 1, 0 3 1, 1 3 1, 1 4 1, 3 4 1,  
-1 0 2, 2 0 2, -5 1 2, -1 1 2, 0 2 2, 0 4 2,  
0 6 2, -5 0 8,  
PLAT913\_ALERT\_3\_C Missing # of Very Strong Reflections in FCF .... 9 Note  
2 4 0, 1 5 0, 0 6 0, -3 2 1, 3 4 1, -5 1 2,  
-1 1 2, 0 2 2, 0 6 2,

---

● **Alert level G**

ABSMU01\_ALERT\_1\_G Calculation of \_exptl\_absorpt\_correction\_mu  
not performed for this radiation type.  
PLAT720\_ALERT\_4\_G Number of Unusual/Non-Standard Labels ..... 1 Note  
Br01  
PLAT793\_ALERT\_4\_G Model has Chirality at C6 (Centro SpGr) S Verify  
PLAT793\_ALERT\_4\_G Model has Chirality at C13 (Centro SpGr) R Verify  
PLAT910\_ALERT\_3\_G Missing # of FCF Reflection(s) Below Theta (Min). 2 Note  
1 0 0, 0 2 0,  
PLAT912\_ALERT\_4\_G Missing # of FCF Reflections Above STh/L= 0.600 15 Note  
PLAT933\_ALERT\_2\_G Number of HKL-OMIT Records in Embedded .res File 3 Note  
2 1 1, 0 1 1, 1 0 0,  
PLAT954\_ALERT\_1\_G Reported (CIF) and Actual (FCF) Kmax Differ by . 1 Units  
PLAT969\_ALERT\_5\_G The 'Henn et al.' R-Factor-gap value ..... 3.741 Note  
Predicted wR2: Based on SigI\*\*2 3.24 or SHELX Weight 11.34  
PLAT978\_ALERT\_2\_G Number C-C Bonds with Positive Residual Density. 6 Info

---

0 **ALERT level A** = Most likely a serious problem - resolve or explain  
0 **ALERT level B** = A potentially serious problem, consider carefully  
3 **ALERT level C** = Check. Ensure it is not caused by an omission or oversight  
10 **ALERT level G** = General information/check it is not something unexpected

2 ALERT type 1 CIF construction/syntax error, inconsistent or missing data  
3 ALERT type 2 Indicator that the structure model may be wrong or deficient  
3 ALERT type 3 Indicator that the structure quality may be low  
4 ALERT type 4 Improvement, methodology, query or suggestion  
1 ALERT type 5 Informative message, check

---

---

It is advisable to attempt to resolve as many as possible of the alerts in all categories. Often the minor alerts point to easily fixed oversights, errors and omissions in your CIF or refinement strategy, so attention to these fine details can be worthwhile. In order to resolve some of the more serious problems it may be necessary to carry out additional measurements or structure refinements. However, the purpose of your study may justify the reported deviations and the more serious of these should normally be commented upon in the discussion or experimental section of a paper or in the "special\_details" fields of the CIF. checkCIF was carefully designed to identify outliers and unusual parameters, but every test has its limitations and alerts that are not important in a particular case may appear. Conversely, the absence of alerts does not guarantee there are no aspects of the results needing attention. It is up to the individual to critically assess their own results and, if necessary, seek expert advice.

### **Publication of your CIF in IUCr journals**

A basic structural check has been run on your CIF. These basic checks will be run on all CIFs submitted for publication in IUCr journals (*Acta Crystallographica*, *Journal of Applied Crystallography*, *Journal of Synchrotron Radiation*); however, if you intend to submit to *Acta Crystallographica Section C* or *E* or *IUCrData*, you should make sure that full publication checks are run on the final version of your CIF prior to submission.

### **Publication of your CIF in other journals**

Please refer to the *Notes for Authors* of the relevant journal for any special instructions relating to CIF submission.

---

**PLATON version of 13/05/2024; check.def file version of 04/05/2024**
